# Supplementary material for: A synthetic biology and green bioprocess approach to recreate agarwood sesquiterpenoid mixtures
Source: Royal Society of Chemistry journal article supplement (doi:10.1039/d3gc03708h), 2023-12-19
Supplement: d3gc03708h1.pdf [file d3gc03708h1.pdf]

## Supplementary information

### **A synthetic biology and green bioprocess approach to recreate agarwood sesquiterpenoid mixtures**

Sergio Gutiérrez<sup>1</sup>, Sebastian Overmans<sup>1</sup>, Gordon B. Wellman<sup>1</sup>, Vasilios G. Samaras<sup>2</sup>, Claudia Oviedo<sup>3,4</sup>, Martin Gede<sup>3,5</sup>, Gyorgy Szekely<sup>3,4,5</sup>, Kyle J. Lauersen<sup>1\*</sup>

<sup>1</sup> Bioengineering Program, Biological, Environmental Sciences and Engineering Division (BESE), King Abdullah University of Science and Technology (KAUST), Thuwal, Saudi Arabia.

<sup>2</sup> Analytical Chemistry Core Lab (ACL), King Abdullah University of Science and Technology (KAUST), Thuwal, Saudi Arabia.

<sup>3</sup> Advanced Membranes and Porous Materials Center (AMPM), Physical Science and Engineering Division (PSE), King Abdullah University of Science and Technology (KAUST), Thuwal, Saudi Arabia.

<sup>4</sup> Environmental Science and Engineering Program, Biological, Environmental Sciences and Engineering Division (BESE), King Abdullah University of Science and Technology (KAUST), Thuwal, Saudi Arabia.

<sup>5</sup> Chemical Engineering Program, Physical Science and Engineering Division (PSE), King Abdullah University of Science and Technology (KAUST), Thuwal, Saudi Arabia

\*Corresponding author: [kyle.lauersen@kaust.edu.sa](mailto:kyle.lauersen@kaust.edu.sa)

## Supplementary Figures

**Supplementary Figure 1** Gardner Colour Scale.

**Supplementary Figure 2.** Correlation of Agarwood Color Intensity.

**Supplementary Figure 3.** Image of ColorChecker Passport.

**Supplementary Figure 4.** Optimisation of *Chlamydomonas reinhardtii* metabolism for heterologous sesquiterpene production.

**Supplementary Figure 5.** Growth assessment of engineered *Chlamydomonas reinhardtii* engineered strains.

**Supplementary Figure 6.** Calibration curves of sesquiterpenoid standards.

**Supplementary Figure 7.** Correlation matrix heatmap of agarwood samples.

## Supplementary Tables

**Supplementary Table 1.** Agarwood samples description.

**Supplementary Table 2.** STPs identified across agarwood (bakhour) samples using GCxGC–TOF/MS.

**Supplementary Table 3.** STPs identified across agarwood distillates (Oudh) samples using GCxGC–TOF/MS.

**Supplementary Table 4.** Terpenoid standard mixture analysed using GCxGC–TOF/MS.

**Supplementary Table 5.** *Chlamydomonas reinhardtii* metabolism optimisation to produce heterologous STPs.

**Supplementary Table 6.** List of plasmids.

**Supplementary Table 7.** Sesquiterpenoid quantification (single transformation).

**Supplementary Table 8.** Sesquiterpenoid quantification (double transformation).

**Supplementary Table 9.** Summary of STP quantification.

**Supplementary Table 10.** Concentrated algal-produced STPs identified in ethanol using GCxGC–TOF/MS.

**Supplementary Table 11.** Sesquiterpenoids identified after hydroboration-oxidation reaction using GCxGC–TOF/MS.

**Supplementary Table 12.** Common sesquiterpenoids identified using GCxGC-TOF/MS in alga-derivate mixture, agarwood and agarwood distillate samples.

**Supplementary Table 13.** Mass spectra of sesquiterpenoids identified by GC – MS.

## Supplementary Files

Files can be downloaded in the following link:

[https://datadryad.org/stash/share/ISU89kHS9Poefgh9g65\\_v6Koerab9ZoBaYyGCclri98](https://datadryad.org/stash/share/ISU89kHS9Poefgh9g65_v6Koerab9ZoBaYyGCclri98)

**Supplementary File 1.** GCxGC-TOF/MS data report of agarwood samples.

**Supplementary File 2.** GCxGC-TOF/MS raw data of agarwood samples.

**Supplementary File 3.** GC-TOF/MS raw data of agarwood samples.

**Supplementary File 4.** GC-MS/FID raw data of engineered algae strains.

**Supplementary File 5.** Genetic constructs.

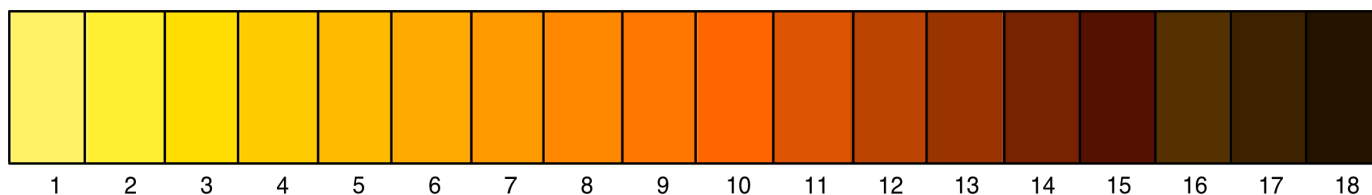

**Supplementary Figure 1.** Gardner Colour Scale.

Gardner Color Scale utilized for agarwood sample assessment. Displaying a progression from pale yellow (1) to dark red (18), this scale provides a standardized method for quantifying the color intensity of agarwood samples. Each number corresponds to a specific hue, enabling precise color matching and consistency evaluation. Analysis of sample images and assignment of color values according to the scale were conducted using ImageJ software (NIH, USA).

**a**

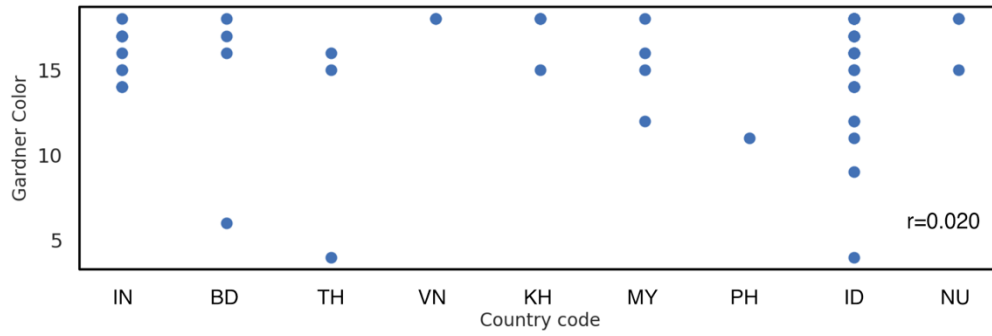

**b**

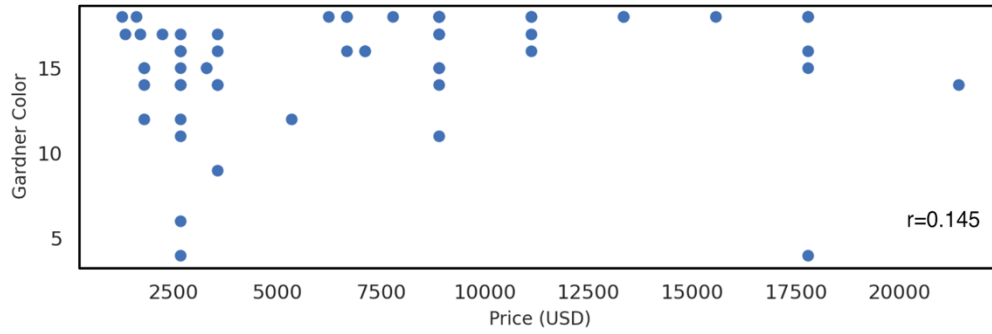

**c**

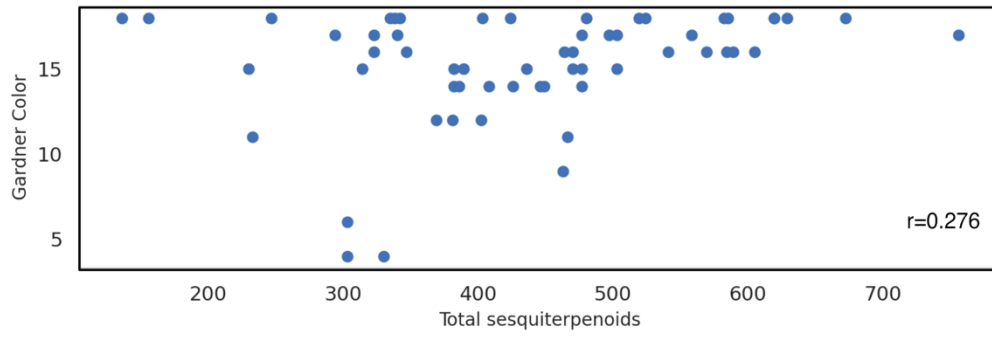

**d**

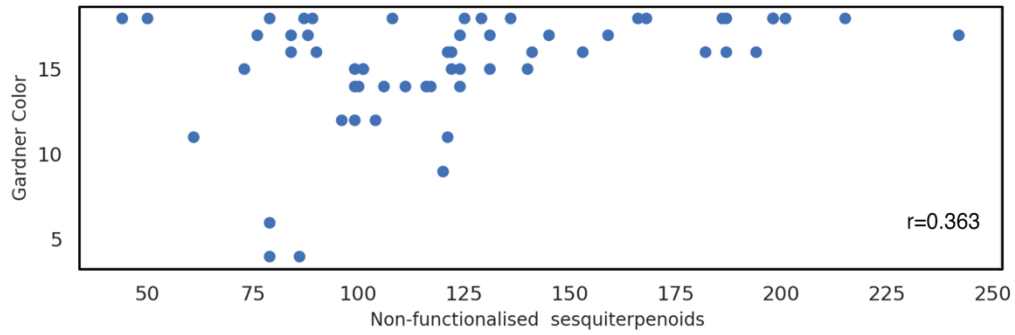

**e**

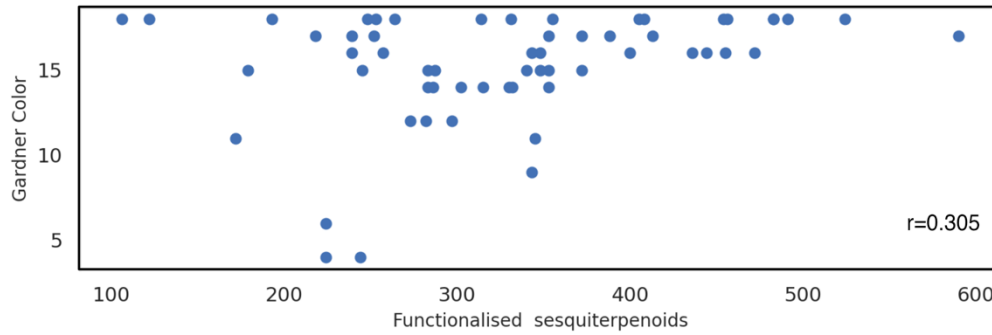

**Supplementary Figure 2.** Correlation of Agarwood Color Intensity.

**a.** presents a negligible correlation ( $r = -0.020$ ) between Gardner Color values and the country of origin, implying no significant influence of geographical source on color intensity. **b.** indicates a slight positive correlation ( $r = 0.145$ ) between color intensity and price, suggesting that more intense coloring could potentially command a higher market price, although the association is weak. **c.** reveals a mild positive correlation ( $r = 0.276$ ) with total sesquiterpenoids content, while **d.** shows a moderate positive correlation ( $r = 0.363$ ) with non-functionalised sesquiterpenoids content, and **e.** displays a similar positive correlation ( $r = 0.305$ ) with functionalised sesquiterpenoids content, each indicating a trend towards darker colors with higher concentrations of these compounds. The correlations hint at a moderate influence of sesquiterpenoid content on the color intensity of agarwood, independent of its country of origin. Statistical performed using R Studio, and the complete set of values utilized for correlation coefficient analysis is available in **Supplementary Table 1**. Country codes are defined as follows: **IN** (India), **BD** (Bangladesh), **TH** (Thailand), **VN** (Vietnam), **KH** (Cambodia), **MY** (Malaysia), **PH** (Philippines), **ID** (Indonesia), **NU** (Unknown).

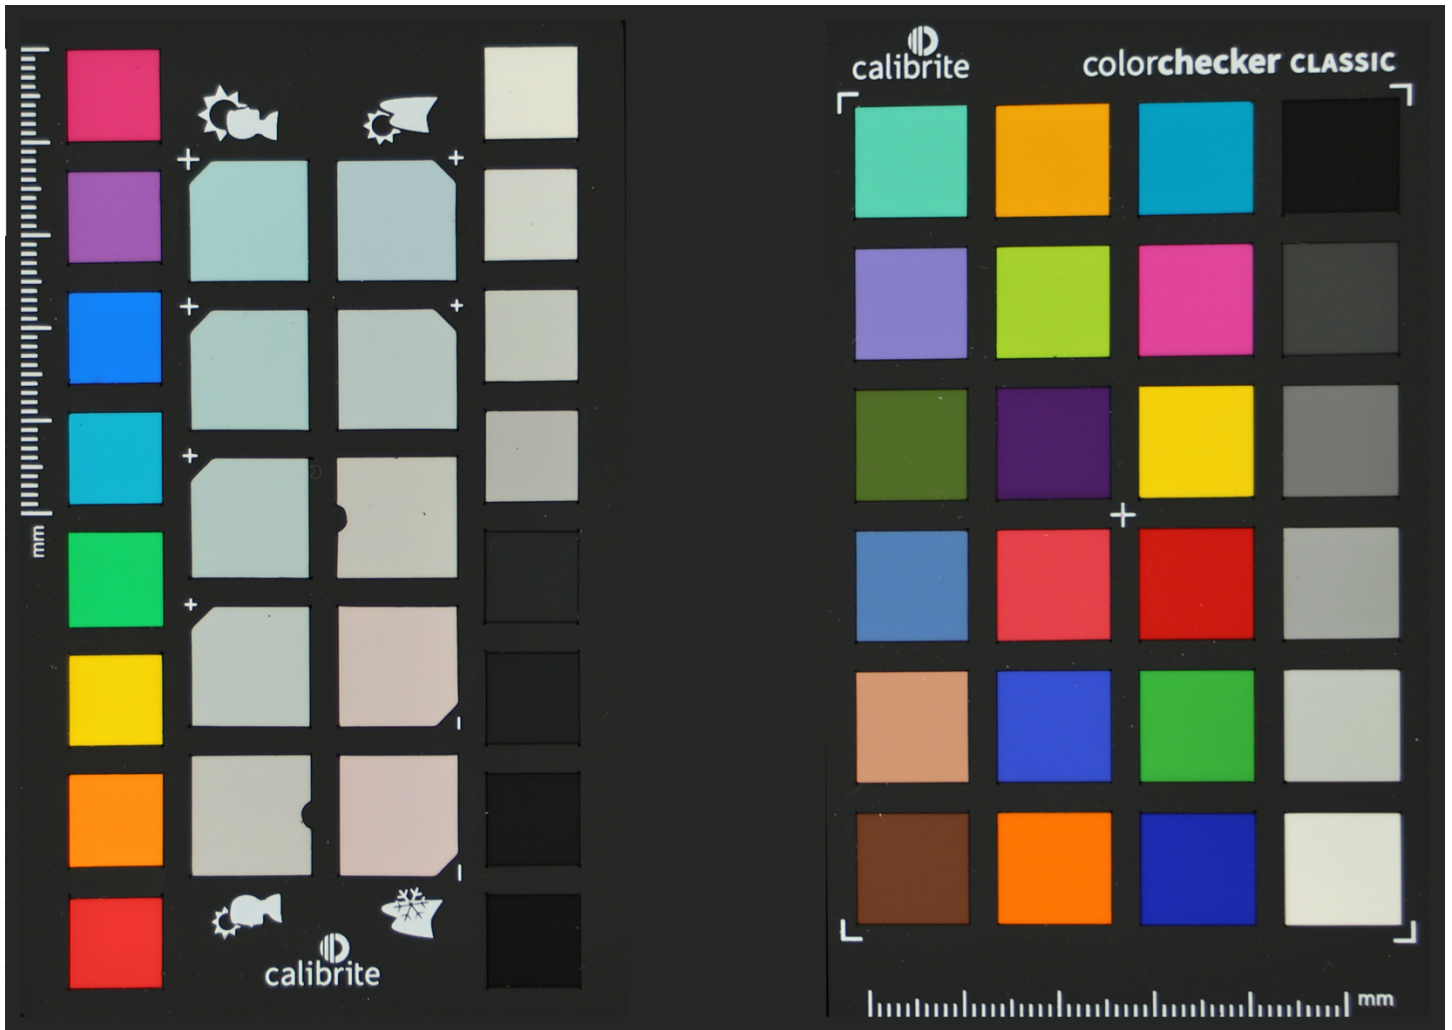

**Supplementary Figure 3.** Image of ColorChecker Passport.

Photograph of the ColorChecker Passport (CCPP2, Calibrite LLC, DE, USA) used for precise colour calibration. The calibration was achieved using the ColorChecker calibration software (Calibrite LLC, DE, USA) in conjunction with Adobe Lightroom (Adobe Inc., CA, USA) for colour correction profiling.

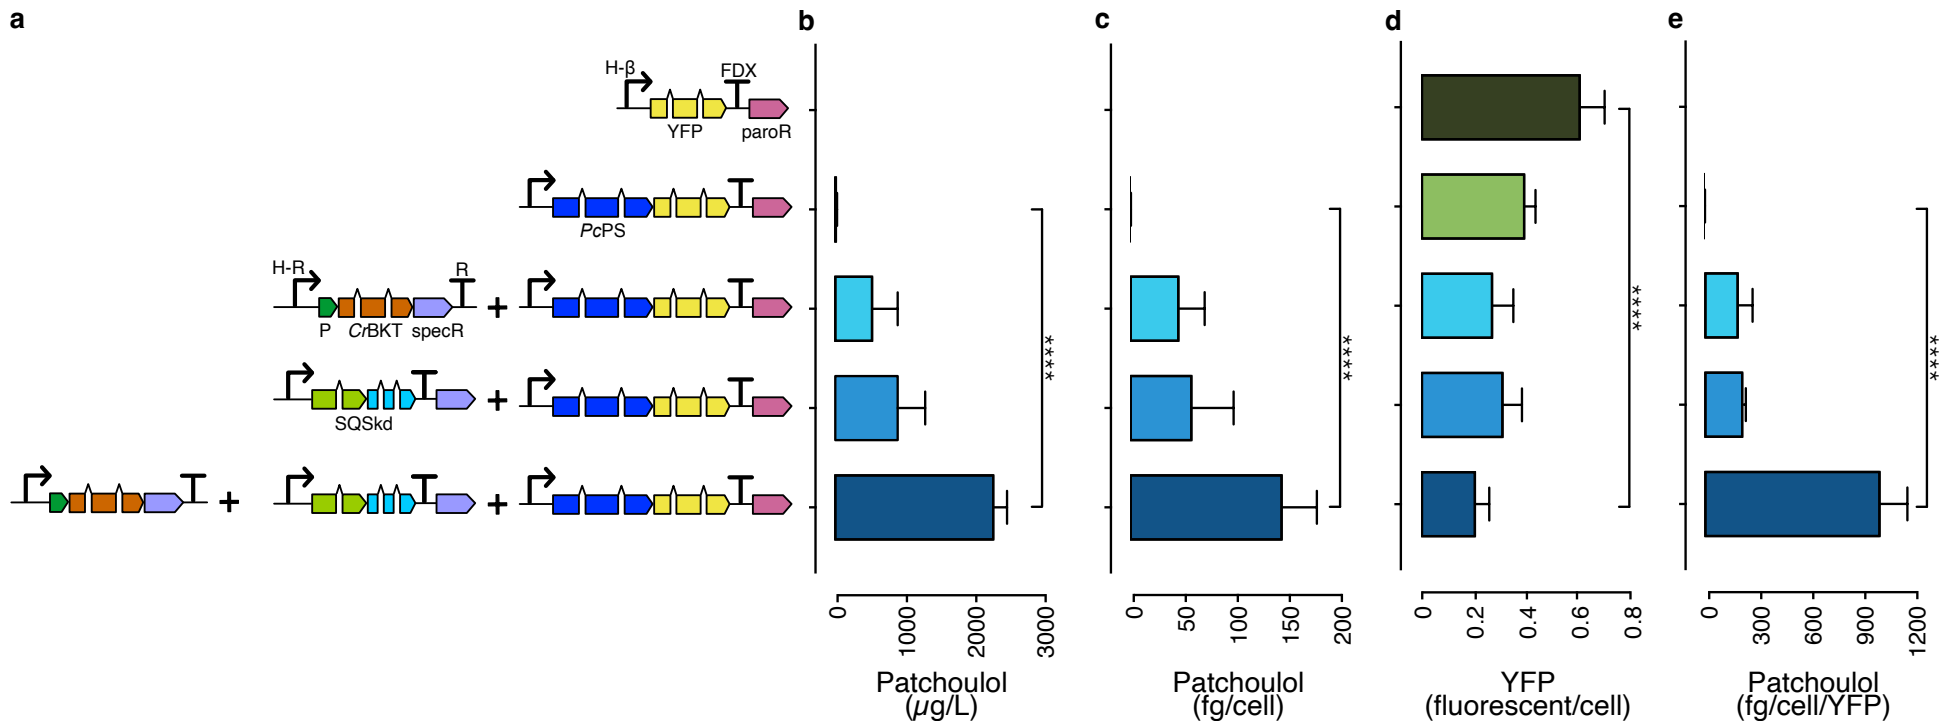

**Supplementary Figure 4.** Optimisation of *Chlamydomonas reinhardtii* metabolism for heterologous sesquiterpene production.

**a.** A variety of vectors, each containing algal-optimized genes such as mVenus (yellow fluorescent protein, YFP), PcPS-mVenus fusion, CrBKT, and CrSQS knockdown (k.d.), all integrated into the *C. reinhardtii* UPN22 parent strain. **b.** Patchoulol yields ( $\mu\text{g/L}$ ) achieved with each engineered construct. **c.** Patchoulol yields (fg/cell) for each unique construct. **d.** Yellow fluorescent signal per cell for individual constructs. **e.** Patchoulol production for each construct normalised per cell by YFP fluorescence. **Definitions:** "k.d." refers to knock down; "PcPS" stands for *Pogostemon cablin* patchoulol synthase; "CrBKT" is *Chlamydomonas reinhardtii*  $\beta$ -carotene ketolase; "SQS" designates squalene synthase; "paroR" symbolises paromomycin resistance; "specR" identifies spectinomycin resistance; "H- $\beta$ " represents the combined HSP70A- $\beta$  tubulin promoter; "FDX" is the abbreviation for the ferredoxin 1 gene terminator; "P" indicates the photosystem I reaction centre subunit II. Statistical variations between groups were identified using ANOVA with Tukey's method for multiple comparisons. **Statistical significances:** \* $P < 0.05$ , \*\* $P < 0.01$ , \*\*\* $P < 0.001$ . Comprehensive calculations, cell concentrations, and p-values are available in Supplementary Table 4.

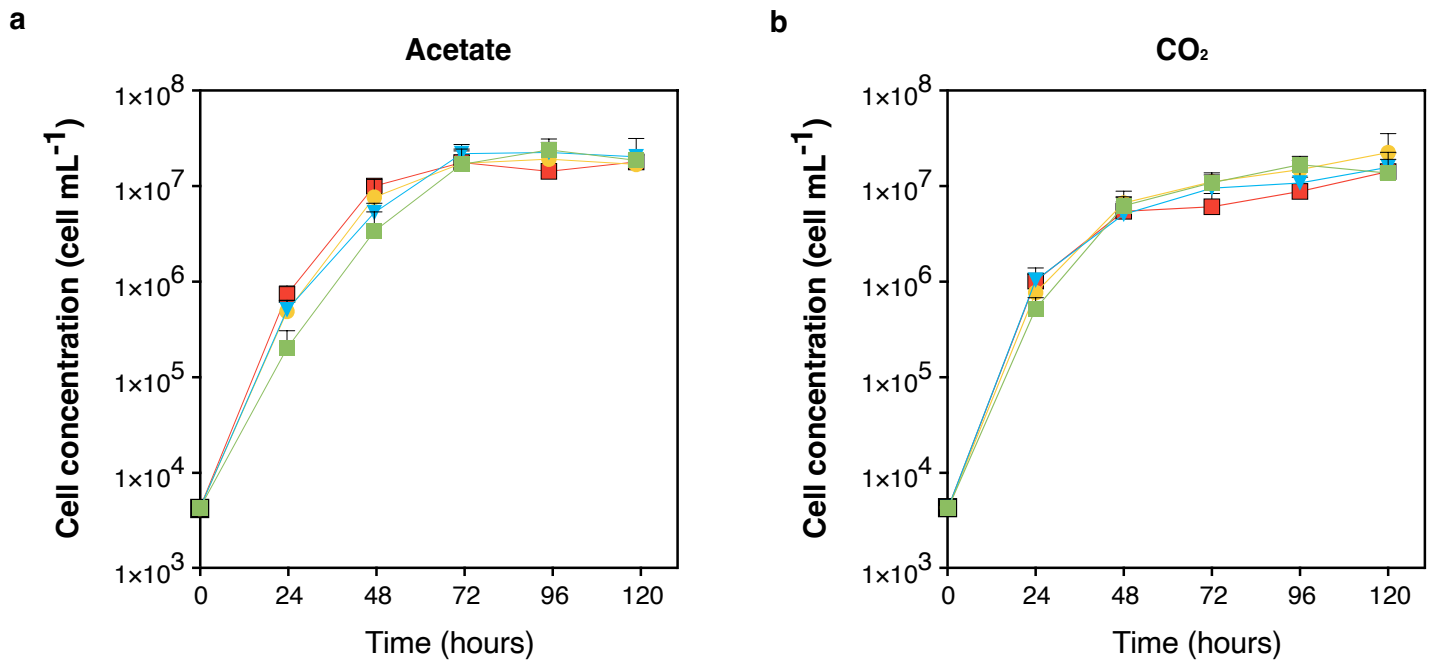

**Supplementary Figure 5.** Growth assessment of engineered *Chlamydomonas reinhardtii* engineered strains.

Analysis of cell concentration over a 120-hour period under two distinct carbon sources: (a) acetate, and (b) carbon dioxide (CO<sub>2</sub>). Four transformants from each cell line were assessed and compared to the parental strain, *C. reinhardtii* UPN22. Sampling was performed every 24 hours using an automated liquid handler (Opentrons Labworks Inc., NY, USA), with cell counts determined by flow cytometry (Thermo Fisher Scientific, MA, USA). Statistical differences between the groups were identified through ANOVA, utilising Tukey's method for multiple comparisons. Significance levels are marked as follows: \* $p < 0.05$ , \*\* $p < 0.01$ , \*\*\* $p < 0.001$ .



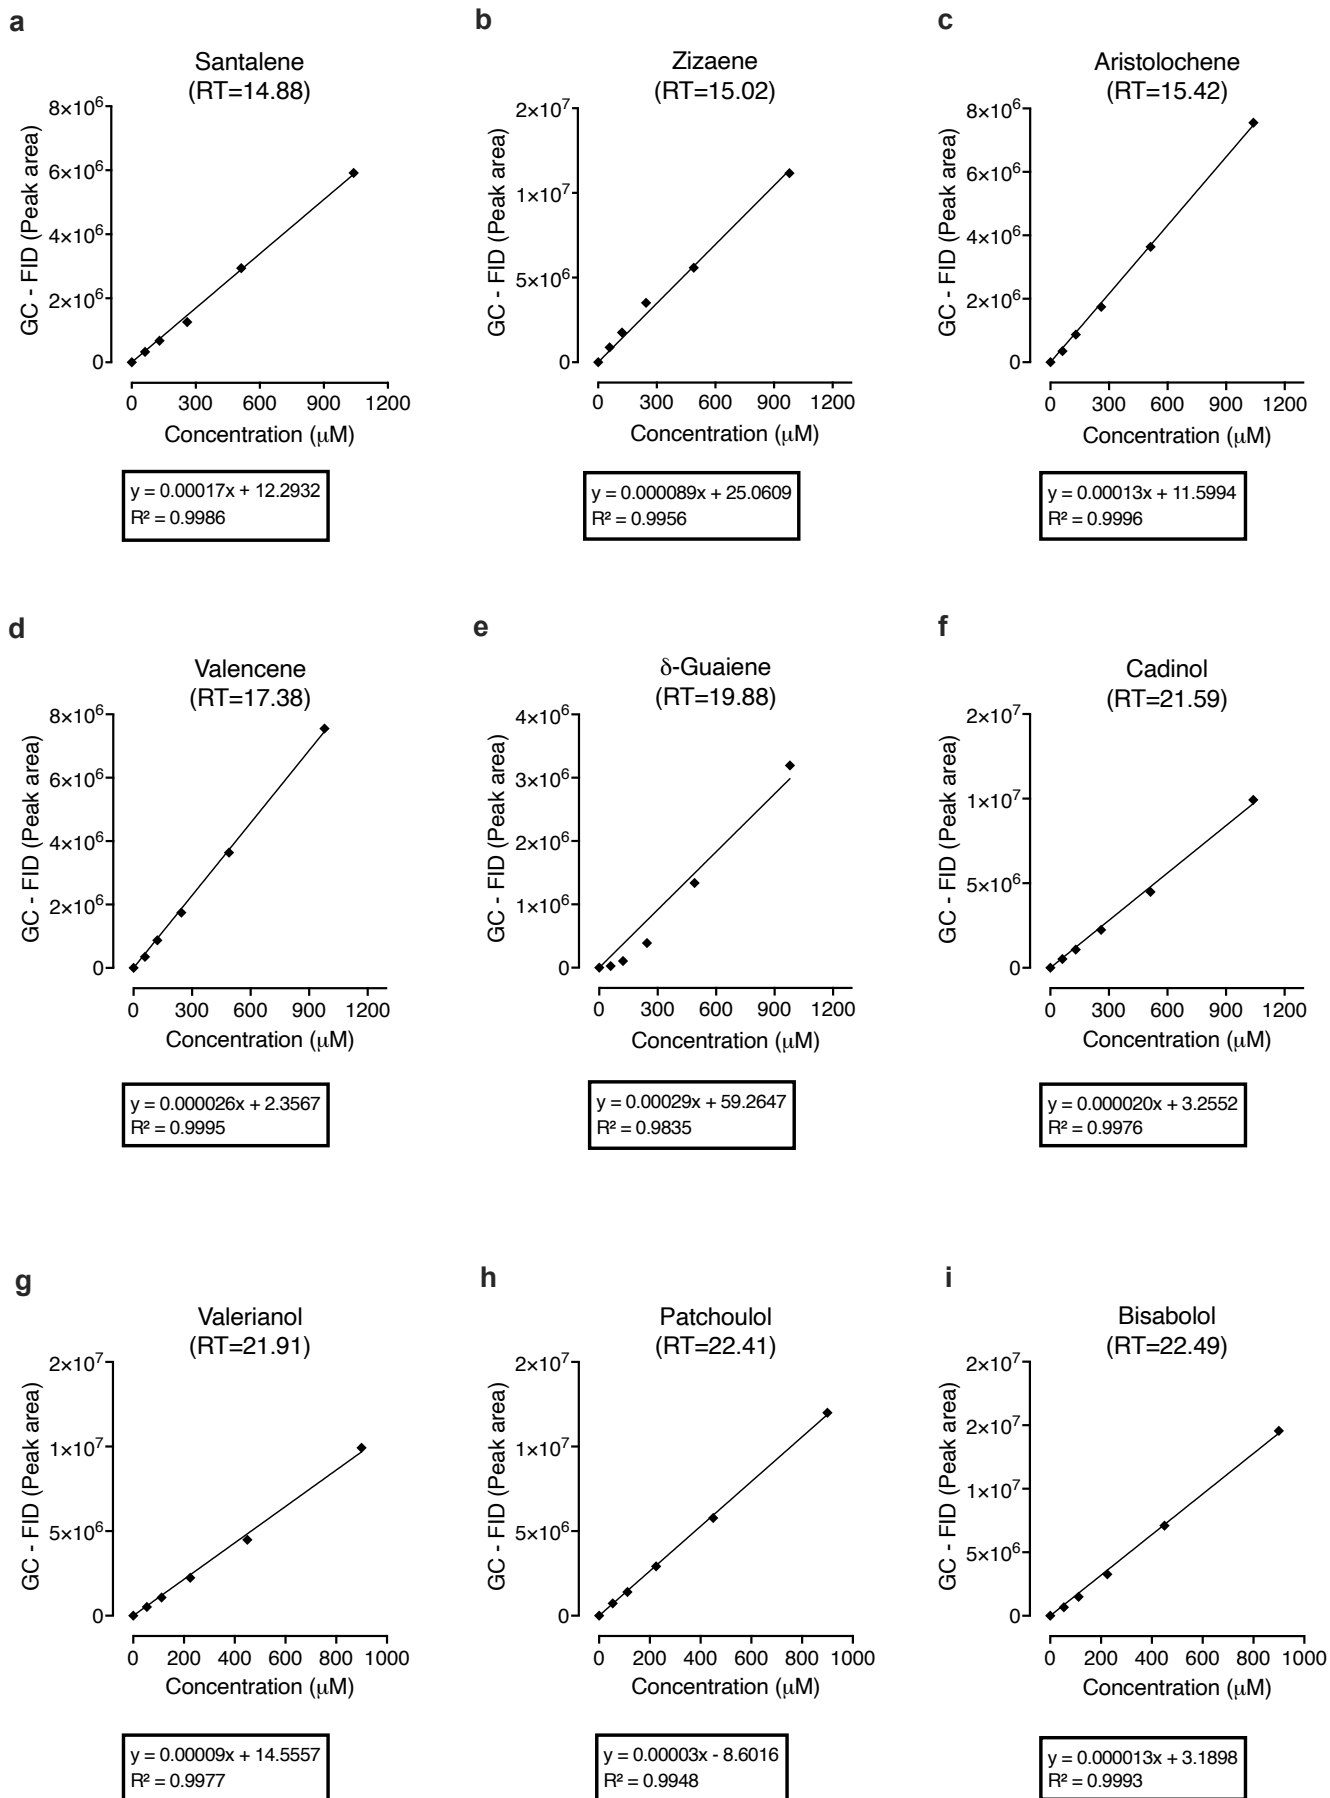

**Supplementary Figure 6.** Calibration curves of sesquiterpenoid standards.

Calibration curves and calculations utilised purified standards, with concentrations ranging from 1–1200  $\mu\text{M}$  in dodecane, of the following sesquiterpenoids:  $\delta$ -guaiene (CAT#B942760), patchoulol (CAT#P206200), santalene (CAT#S15065), valerianol (CAT#V914000, Toronto Research Chemicals, ON, Canada), bisabolol (CAT#95426), valencene (CAT#06808), and cedrene (CAT#22133, Sigma-Aldrich, MO, USA). For compound identification, retention time acquisition, internal digital library calibration, and method development, we used a set of 12 microampules containing a standard terpene mixture, which covered 98 terpenes at 1.0 mM in methanol (CAT# MSITPN101, MetaSci, ON, Canada).

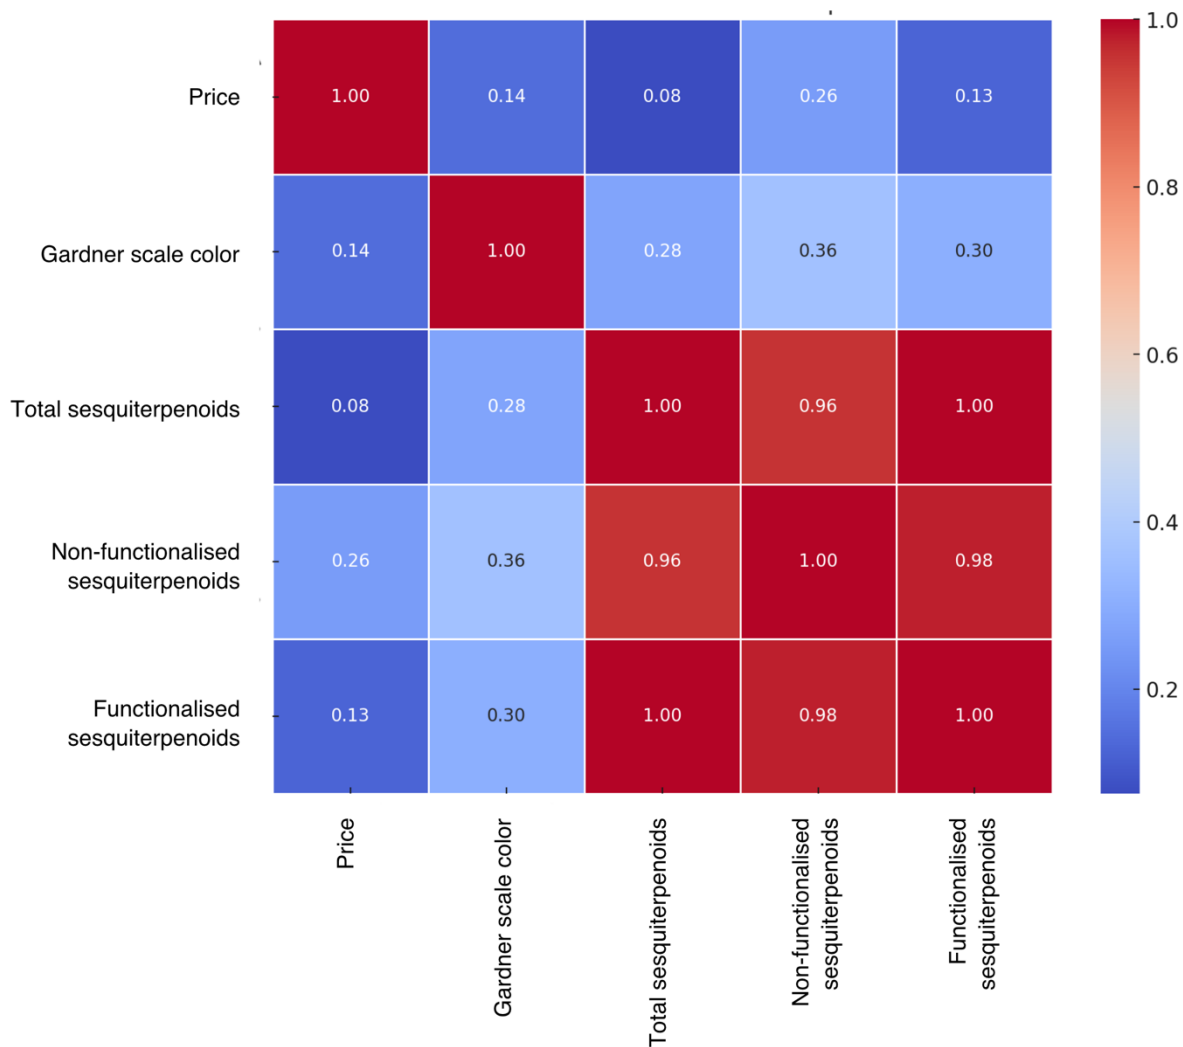

**Supplementary Figure 7.** Correlation matrix heatmap of agarwood samples.

The heatmap offers a comprehensive depiction of the Pearson correlation coefficients, showcasing the linear relationships between price, color, and sesquiterpenoid compound classifications found in the agarwood samples. There is a weak positive correlation ( $r = 0.14$ ) between price and color, indicating that higher prices might be associated with more intense colors. There exists an inverse relationship ( $r = -0.08$ ) between price and total sesquiterpenoid concentration, suggesting that while cost may not primarily depend on sesquiterpenoid content alone, it could still have some impact on pricing decisions to a lesser extent. The color demonstrates highly significant positive correlations with both non-functionalised ( $r = 0.96$ ) and functionalised sesquiterpenoids ( $r = 0.98$ ), implying a strong link between the intensity of color and the sesquiterpenoids.

**Supplementary Table 1.** Agarwood samples description.

| No. Sample | Type     | Origin (Country) | Code (Country) | Price (USD) (Kg or L) | Gardner color standard value | Total sesquiterpenoids (n=) | Non-functionalised sesquiterpenoids (n=) | Functionalised sesquiterpenoids (n=) |
|------------|----------|------------------|----------------|-----------------------|------------------------------|-----------------------------|------------------------------------------|--------------------------------------|
| 1          | Agarwood | Philippines      | PH             | \$ 8,888              | 11                           | 233                         | 61                                       | 172                                  |
| 2          | Agarwood | Indonesia        | ID             | \$ 3,555              | 9                            | 463                         | 120                                      | 343                                  |
| 3          | Agarwood | Indonesia        | ID             | \$ 2,666              | 11                           | 466                         | 121                                      | 345                                  |
| 4          | Agarwood | Indonesia        | ID             | \$ 2,666              | 12                           | 402                         | 104                                      | 297                                  |
| 5          | Agarwood | Indonesia        | ID             | \$ 7,111              | 16                           | 541                         | 141                                      | 400                                  |
| 6          | Agarwood | Malaysia         | MY             | \$ 3,288              | 15                           | 503                         | 131                                      | 372                                  |
| 7          | Agarwood | Indonesia        | ID             | \$ 2,666              | 14                           | 408                         | 106                                      | 302                                  |
| 8          | Agarwood | Indonesia        | ID             | \$ 8,888              | 14                           | 386                         | 100                                      | 286                                  |
| 9          | Agarwood | Indonesia        | ID             | \$ 1,688              | 17                           | 503                         | 131                                      | 372                                  |
| 10         | Agarwood | Indonesia        | ID             | \$ 2,666              | 4                            | 303                         | 79                                       | 224                                  |
| 11         | Agarwood | Bangladesh       | BD             | \$ 2,666              | 6                            | 303                         | 79                                       | 224                                  |
| 12         | Agarwood | Malaysia         | MY             | \$ 5,333              | 12                           | 381                         | 99                                       | 282                                  |
| 13         | Agarwood | Indonesia        | ID             | \$ 3,555              | 17                           | 323                         | 84                                       | 239                                  |
| 14         | Agarwood | India            | IN             | \$ 2,666              | 17                           | 558                         | 145                                      | 413                                  |
| 15         | Agarwood | India            | IN             | \$ 8,888              | 17                           | 294                         | 76                                       | 218                                  |
| 16         | Agarwood | Thailand         | TH             | \$ 17,777             | 4                            | 330                         | 86                                       | 244                                  |
| 17         | Agarwood | Indonesia        | ID             | \$ 3,555              | 16                           | 589                         | 153                                      | 436                                  |
| 18         | Agarwood | Indonesia        | ID             | \$ 7,111              | 16                           | 347                         | 90                                       | 257                                  |
| 19         | Agarwood | Thailand         | TH             | \$ 3,288              | 15                           | 382                         | 99                                       | 283                                  |
| 20         | Agarwood | India            | IN             | \$ 2,666              | 14                           | 382                         | 99                                       | 283                                  |
| 21         | Agarwood | Indonesia        | ID             | \$ 21,422             | 14                           | 477                         | 124                                      | 353                                  |
| 22         | Agarwood | Indonesia        | ID             | \$ 1,777              | 12                           | 369                         | 96                                       | 273                                  |
| 23         | Agarwood | India            | IN             | \$ 3,555              | 14                           | 449                         | 117                                      | 332                                  |
| 24         | Agarwood | Indonesia        | ID             | \$ 3,555              | 14                           | 446                         | 116                                      | 330                                  |
| 25         | Agarwood | India            | IN             | \$ 1,777              | 15                           | 389                         | 101                                      | 287                                  |
| 26         | Agarwood | Indonesia        | ID             | \$ 2,666              | 15                           | 470                         | 122                                      | 348                                  |
| 27         | Agarwood | Indonesia        | ID             | \$ 1,333              | 17                           | 477                         | 124                                      | 353                                  |
| 28         | Agarwood | Indonesia        | ID             | \$ 2,666              | 16                           | 470                         | 122                                      | 348                                  |
| 29         | Agarwood | India            | IN             | \$ 1,777              | 14                           | 426                         | 111                                      | 315                                  |

**Supplementary Table 1. (Cont.)**

| No. Sample | Type       | Origin (Country) | Code (Country) | Price (USD) (Kg or L) | Gardner color standard value | Total sesquiterpenoids (n=) | Non-functionalised sesquiterpenoids (n=) | Functionalised sesquiterpenoids (n=) |
|------------|------------|------------------|----------------|-----------------------|------------------------------|-----------------------------|------------------------------------------|--------------------------------------|
| 30         | Agarwood   | India            | IN             | \$ 2,666              | 16                           | 464                         | 121                                      | 343                                  |
| 31         | Agarwood   | Indonesia        | ID             | \$ 1,600              | 18                           | 480                         | 125                                      | 355                                  |
| 32         | Agarwood   | Indonesia        | ID             | \$ 2,222              | 17                           | 340                         | 88                                       | 252                                  |
| 33         | Agarwood   | Indonesia        | ID             | \$ 6,222              | 18                           | 335                         | 87                                       | 248                                  |
| 34         | Agarwood   | Indonesia        | ID             | \$ 1,777              | 15                           | 477                         | 124                                      | 353                                  |
| 35         | Agarwood   | Thailand         | TH             | \$ 2,666              | 16                           | 323                         | 84                                       | 239                                  |
| 36         | Agarwood   | Vietnam          | VN             | \$ 1,244              | 18                           | 342                         | 89                                       | 253                                  |
| 37         | Distillate | Bangladesh       | BD             | \$ 8,888              | 17                           | 497                         | 159                                      | 388                                  |
| 38         | Distillate | Bangladesh       | BD             | \$ 6,666              | 18                           | 338                         | 108                                      | 264                                  |
| 39         | Distillate | Indonesia        | ID             | \$ 7,777              | 18                           | 524                         | 168                                      | 408                                  |
| 40         | Distillate | Cambodia         | KH             | \$ 11,111             | 18                           | 403                         | 129                                      | 314                                  |
| 41         | Distillate | Indonesia        | ID             | \$ 17,777             | 18                           | 424                         | 136                                      | 331                                  |
| 42         | Distillate | Bangladesh       | BD             | \$ 11,111             | 16                           | 584                         | 187                                      | 455                                  |
| 43         | Distillate | Malaysia         | MY             | \$ 17,777             | 18                           | 582                         | 186                                      | 454                                  |
| 44         | Distillate | Cambodia         | KH             | \$ 8,888              | 18                           | 629                         | 201                                      | 491                                  |
| 45         | Distillate | India            | IN             | \$ 11,111             | 17                           | 756                         | 242                                      | 590                                  |
| 46         | Distillate | Unknown          | NU             | \$ 6,666              | 18                           | 619                         | 198                                      | 483                                  |
| 47         | Distillate | Unknown          | NU             | \$ 8,888              | 18                           | 672                         | 215                                      | 524                                  |
| 48         | Distillate | Indonesia        | ID             | \$ 13,333             | 18                           | 585                         | 187                                      | 456                                  |
| 49         | Distillate | Indonesia        | ID             | \$ 13,333             | 18                           | 519                         | 166                                      | 405                                  |
| 50         | Distillate | Cambodia         | KH             | \$ 8,888              | 15                           | 314                         | 101                                      | 245                                  |
| 51         | Distillate | Vietnam          | VN             | \$ 8,888              | 18                           | 247                         | 79                                       | 193                                  |
| 52         | Distillate | Indonesia        | ID             | \$ 6,666              | 16                           | 605                         | 194                                      | 472                                  |
| 53         | Distillate | Cambodia         | KH             | \$ 8,888              | 18                           | 619                         | 198                                      | 483                                  |
| 54         | Distillate | India            | IN             | \$ 17,777             | 15                           | 436                         | 140                                      | 340                                  |
| 55         | Distillate | Malaysia         | MY             | \$ 17,777             | 16                           | 569                         | 182                                      | 444                                  |
| 56         | Distillate | India            | IN             | \$ 11,111             | 18                           | 156                         | 50                                       | 122                                  |
| 57         | Distillate | Indonesia        | ID             | \$ 15,555             | 18                           | 136                         | 44                                       | 106                                  |
| 58         | Distillate | Unknown          | NU             | \$ 8,888              | 15                           | 230                         | 73                                       | 179                                  |

**Supplementary Table 2.** Sesquiterpenoids identified across agarwood (bakhour) samples using GCxGC-TOF/MS.

| Compound Name                                                                                                   | Mol. formula                      | Clas. | RT I (min) | RT II (sec) | MF  | P (%) |
|-----------------------------------------------------------------------------------------------------------------|-----------------------------------|-------|------------|-------------|-----|-------|
| Aromadendrene                                                                                                   | C <sub>15</sub> H <sub>22</sub>   | STP   | 34.70      | 2.64        | 772 | 94    |
| $\alpha$ -Cubebene                                                                                              | C <sub>15</sub> H <sub>24</sub>   | STP   | 34.70      | 2.22        | 714 | 68    |
| 4a,5-Dimethyl-3-(prop-1-en-2-yl)-1,2,3,4,4a,5,6,7-octahydronaphthalen-1-ol                                      | C <sub>15</sub> H <sub>24</sub> O | FSTP  | 34.70      | 2.62        | 654 | 48    |
| $\beta$ -Vatirenene                                                                                             | C <sub>15</sub> H <sub>22</sub>   | STP   | 35.80      | 3.85        | 624 | 84    |
| Germacrene A                                                                                                    | C <sub>15</sub> H <sub>24</sub>   | STP   | 37.30      | 2.44        | 633 | 85    |
| $\beta$ -copaene                                                                                                | C <sub>15</sub> H <sub>24</sub>   | STP   | 37.30      | 2.42        | 674 | 92    |
| 1,5-Cyclodecadiene, 1,5-dimethyl-8-(1-methylethenyl)-, [S-(Z,E)]-                                               | C <sub>15</sub> H <sub>24</sub>   | STP   | 37.30      | 2.46        | 647 | 94    |
| $\alpha$ -gurjunene                                                                                             | C <sub>15</sub> H <sub>24</sub>   | STP   | 38.20      | 2.66        | 641 | 65    |
| (2R,3R,3aR,6R,8aS)-3,7,7-Trimethyl-8-methyleneoctahydro-1H-3a,6-methanoazulen-2-ol                              | C <sub>15</sub> H <sub>24</sub> O | FSTP  | 38.70      | 3.17        | 654 | 82    |
| muuroladiene                                                                                                    | C <sub>15</sub> H <sub>24</sub>   | STP   | 39.10      | 2.76        | 659 | 75    |
| Caryophyllene                                                                                                   | C <sub>15</sub> H <sub>24</sub>   | STP   | 39.30      | 2.68        | 604 | 82    |
| Patchouladiene                                                                                                  | C <sub>15</sub> H <sub>22</sub>   | STP   | 39.50      | 3.04        | 643 | 84    |
| 1H-Cycloprop[e]azulene, decahydro-1,1,4,7-tetramethyl-                                                          | C <sub>15</sub> H <sub>26</sub>   | STP   | 39.90      | 2.36        | 662 | 86    |
| 4b,5,6,7,8,8a,9,10-Octahydro-1-methylphenanthrene                                                               | C <sub>15</sub> H <sub>20</sub>   | FSTP  | 40.20      | 3.31        | 786 | 90    |
| Cycloisolongifolol                                                                                              | C <sub>15</sub> H <sub>24</sub> O | FSTP  | 40.40      | 2.90        | 709 | 87    |
| $\beta$ -GURJUNENE                                                                                              | C <sub>15</sub> H <sub>24</sub>   | STP   | 40.80      | 2.74        | 791 | 90    |
| 4,7-Methanoazulene, 1,2,3,4,5,6,7,8-octahydro-1,4,9,9-tetramethyl-, [1S-(1 $\alpha$ ,4 $\alpha$ ,7 $\alpha$ )]- | C <sub>15</sub> H <sub>24</sub>   | STP   | 40.80      | 2.76        | 665 | 82    |
| Humulene                                                                                                        | C <sub>15</sub> H <sub>24</sub>   | STP   | 40.90      | 3.91        | 673 | 89    |
| $\beta$ -Selinene                                                                                               | C <sub>15</sub> H <sub>24</sub>   | STP   | 40.90      | 2.58        | 693 | 94    |
| $\alpha$ -bisabolene                                                                                            | C <sub>15</sub> H <sub>24</sub>   | STP   | 41.30      | 2.92        | 603 | 90    |
| Alloaromadendrene                                                                                               | C <sub>15</sub> H <sub>24</sub>   | STP   | 41.30      | 2.98        | 716 | 94    |
| Prezizaene                                                                                                      | C <sub>15</sub> H <sub>24</sub>   | STP   | 41.40      | 3.00        | 673 | 90    |
| Calamene                                                                                                        | C <sub>15</sub> H <sub>22</sub>   | STP   | 41.60      | 3.09        | 650 | 87    |
| 1,4,6-Trimethyl-1,2,3,3a,4,7,8,8a-octahydro-4,7-ethanoazulene                                                   | C <sub>15</sub> H <sub>24</sub>   | STP   | 41.70      | 2.88        | 706 | 54    |
| 2-Methyl-3-(3-methyl-but-2-enyl)-2-(4-methyl-pent-3-enyl)-oxetane                                               | C <sub>15</sub> H <sub>26</sub> O | FSTP  | 41.90      | 2.68        | 688 | 17    |
| Cadinene                                                                                                        | C <sub>15</sub> H <sub>28</sub>   | STP   | 42.10      | 2.38        | 514 | 65    |
| (3S,6S)-6-Isopropyl-3-methyl-2-(propan-2-ylidene)-3-vinylcyclohexanone                                          | C <sub>15</sub> H <sub>24</sub> O | FSTP  | 42.30      | 3.09        | 720 | 89    |
| Diepicedrene oxide                                                                                              | C <sub>15</sub> H <sub>24</sub> O | FSTP  | 42.60      | 3.43        | 600 | 42    |

Supplementary Table 2. (Cont.)

| Compound Name                                                                                                                  | Mol. formula                                   | Class. | RT I (min.) | RT II (sec.) | MF  | P (%) |
|--------------------------------------------------------------------------------------------------------------------------------|------------------------------------------------|--------|-------------|--------------|-----|-------|
| (R,Z)-2-Methyl-6-(4-methylcyclohexa-1,4-dien-1-yl)hept-2-en-1-ol                                                               | C <sub>15</sub> H <sub>24</sub> O              | FSTP   | 42.70       | 3.11         | 610 | 73    |
| 1H-Cycloprop[e]azulene, decahydro-1,1,4,7-tetramethyl-, [1aR-(1a $\alpha$ ,4 $\beta$ ,4a $\beta$ ,7 $\beta$ ,7a $\beta$ ,7ba)- | C <sub>15</sub> H <sub>26</sub>                | STP    | 42.90       | 2.62         | 708 | 81    |
| Caparratriene                                                                                                                  | C <sub>15</sub> H <sub>26</sub>                | STP    | 43.10       | 2.60         | 700 | 83    |
| Cycloisolongifolene                                                                                                            | C <sub>15</sub> H <sub>24</sub>                | STP    | 43.10       | 2.98         | 677 | 91    |
| $\beta$ -Guaiene                                                                                                               | C <sub>15</sub> H <sub>24</sub>                | STP    | 43.10       | 3.04         | 722 | 41    |
| Aristolochene                                                                                                                  | C <sub>15</sub> H <sub>24</sub>                | STP    | 43.10       | 3.00         | 641 | 43    |
| Eremophilene                                                                                                                   | C <sub>15</sub> H <sub>24</sub>                | STP    | 43.10       | 2.98         | 733 | 65    |
| $\alpha$ -himachalene                                                                                                          | C <sub>15</sub> H <sub>20</sub>                | FSTP   | 43.30       | 3.59         | 777 | 41    |
| $\beta$ -Bisabolenol                                                                                                           | C <sub>15</sub> H <sub>24</sub> O              | FSTP   | 43.30       | 3.21         | 572 | 79    |
| Eudesmatriene                                                                                                                  | C <sub>15</sub> H <sub>22</sub>                | STP    | 43.40       | 3.17         | 825 | 72    |
| 2-(4a,8-Dimethyl-2,3,4,5,6,7-hexahydro-1H-naphthalen-2-yl)propan-2-ol                                                          | C <sub>15</sub> H <sub>26</sub> O              | FSTP   | 43.40       | 2.94         | 752 | 76    |
| 10,11-Epoxycalamenene                                                                                                          | C <sub>15</sub> H <sub>20</sub> O              | FSTP   | 43.40       | 3.77         | 753 | 61    |
| $\beta$ -Vetispirene                                                                                                           | C <sub>15</sub> H <sub>22</sub>                | STP    | 43.50       | 3.17         | 588 | 38    |
| (2R,8R,8aS)-8,8a-Dimethyl-2-(prop-1-en-2-yl)-1,2,3,7,8,8a-hexahydronaphthalene                                                 | C <sub>15</sub> H <sub>22</sub>                | STP    | 43.50       | 3.13         | 752 | 56    |
| 6-Methyl-2-(4-methylcyclohex-3-en-1-yl)hepta-1,5-dien-4-ol                                                                     | C <sub>15</sub> H <sub>24</sub> O              | FSTP   | 43.70       | 4.27         | 708 | 38    |
| 1H-3a,7-Methanoazulene, octahydro-1,4,9,9-tetramethyl-                                                                         | C <sub>15</sub> H <sub>26</sub>                | STP    | 43.90       | 2.64         | 709 | 67    |
| (3R,3aR,4aR,8aR,9aR)-3,8a-Dimethyl-5-methylene-3,3a,4,4a,5,6,9,9a-octahydronaphtho[2,3-b]furan-2(8aH)-one                      | C <sub>15</sub> H <sub>20</sub> O <sub>2</sub> | FSTP   | 44.80       | 4.70         | 816 | 42    |
| (3R,3aR,3bR,4S,7R,7aR)-4-Isopropyl-3,7-dimethyloctahydro-1H-cyclopenta[1,3]cyclopropa[1,2]benzen-3-ol                          | C <sub>15</sub> H <sub>26</sub> O              | FSTP   | 44.90       | 2.98         | 824 | 84    |
| Nivalenol                                                                                                                      | C <sub>15</sub> H <sub>20</sub> O <sub>7</sub> | FSTP   | 45.20       | 3.55         | 769 | 61    |
| Calamenene                                                                                                                     | C <sub>15</sub> H <sub>22</sub>                | STP    | 45.30       | 3.41         | 625 | 80    |
| Kessane                                                                                                                        | C <sub>15</sub> H <sub>26</sub> O              | FSTP   | 45.80       | 3.37         | 959 | 71    |
| Cubenene                                                                                                                       | C <sub>15</sub> H <sub>24</sub>                | STP    | 45.80       | 3.08         | 449 | 77    |
| 1-Formyl-2,2-dimethyl-3-cis-(2-methyl-but-2-enyl)-6-methylidene-cyclohexane                                                    | C <sub>15</sub> H <sub>24</sub> O              | FSTP   | 46.00       | 3.85         | 931 | 92    |
| 2,6-Dimethyl-10-methylene-12-oxatricyclo[7.3.1.0(1,6)]tridec-2-ene                                                             | C <sub>15</sub> H <sub>22</sub> O              | FSTP   | 46.20       | 3.61         | 829 | 81    |
| $\alpha$ -Calacorene                                                                                                           | C <sub>15</sub> H <sub>20</sub>                | FSTP   | 46.50       | 3.73         | 737 | 84    |
| Nerolidol                                                                                                                      | C <sub>15</sub> H <sub>26</sub> O              | FSTP   | 46.80       | 3.97         | 709 | 70    |
| $\alpha$ -agorofuran                                                                                                           | C <sub>15</sub> H <sub>24</sub> O              | FSTP   | 46.90       | 3.99         | 735 | 71    |
| 2-Pentadecen-4-yne, (Z)-                                                                                                       | C <sub>15</sub> H <sub>26</sub>                | STP    | 46.90       | 5.22         | 720 | 51    |

Supplementary Table 2. (Cont.)

| Compound Name                                                                                 | Mol. formula                                   | Class. | RT I (min.) | RT II (sec.) | MF  | P (%) |
|-----------------------------------------------------------------------------------------------|------------------------------------------------|--------|-------------|--------------|-----|-------|
| Longifolene                                                                                   | C <sub>15</sub> H <sub>20</sub>                | FSTP   | 47.20       | 3.69         | 728 | 62    |
| Aromadendran                                                                                  | C <sub>15</sub> H <sub>26</sub>                | STP    | 47.40       | 4.25         | 754 | 77    |
| Dihydroagarofurane                                                                            | C <sub>15</sub> H <sub>26</sub> O              | FSTP   | 47.50       | 3.47         | 754 | 90    |
| 4-Isopropyl-6-methyl-1-methylene-1,2,3,4-tetrahydronaphthalene                                | C <sub>15</sub> H <sub>20</sub>                | FSTP   | 47.70       | 3.85         | 749 | 88    |
| 4(15)-Selinene-11,12-diol                                                                     | C <sub>15</sub> H <sub>26</sub> O <sub>2</sub> | FSTP   | 47.90       | 4.58         | 875 | 41    |
| 2-(4a,8-Dimethyl-2,3,4,4a,5,6-hexahydro-naphthalen-2-yl)-prop-2-en-1-ol                       | C <sub>15</sub> H <sub>22</sub> O              | FSTP   | 48.20       | 4.86         | 774 | 81    |
| Lanceol                                                                                       | C <sub>15</sub> H <sub>24</sub> O              | FSTP   | 48.60       | 3.55         | 779 | 72    |
| (5S,6R,7S,10R)-7-Isopropyl-2,10-dimethylspiro[4.5]dec-1-en-6-ol                               | C <sub>15</sub> H <sub>26</sub> O              | FSTP   | 48.80       | 3.27         | 755 | 55    |
| Neoisolongifolene                                                                             | C <sub>15</sub> H <sub>22</sub>                | STP    | 49.30       | 2.72         | 773 | 56    |
| α-Santalol                                                                                    | C <sub>15</sub> H <sub>24</sub> O              | FSTP   | 49.50       | 4.72         | 768 | 43    |
| 3,7-Cycloundecadien-1-ol, 1,5,5,8-tetramethyl-isoledene                                       | C <sub>15</sub> H <sub>26</sub> O              | FSTP   | 49.90       | 3.69         | 729 | 44    |
| β-Oplopenone                                                                                  | C <sub>15</sub> H <sub>24</sub> O              | FSTP   | 50.10       | 3.49         | 803 | 60    |
| Eudesmadien                                                                                   | C <sub>15</sub> H <sub>24</sub> O              | FSTP   | 50.20       | 3.69         | 869 | 80    |
| Taylorione                                                                                    | C <sub>15</sub> H <sub>22</sub> O              | FSTP   | 50.50       | 3.95         | 594 | 40    |
| Humulene epoxide I                                                                            | C <sub>15</sub> H <sub>24</sub> O              | FSTP   | 50.50       | 3.87         | 559 | 80    |
| (1R,4S,5S)-1,8-Dimethyl-4-(prop-1-en-2-yl)spiro[4.5]dec-7-ene                                 | C <sub>15</sub> H <sub>24</sub>                | STP    | 51.00       | 4.03         | 579 | 90    |
| 2-((2S,4aR)-4a,8-Dimethyl-1,2,3,4,4a,5,6,7-octahydronaphthalen-2-yl)propan-2-ol               | C <sub>15</sub> H <sub>26</sub> O              | FSTP   | 51.10       | 3.75         | 509 | 60    |
| γ-himachalene                                                                                 | C <sub>15</sub> H <sub>24</sub>                | STP    | 51.10       | 4.17         | 564 | 81    |
| 4a(2H)-Naphthalenol, 1,3,4,5,6,8a-hexahydro-4,7-dimethyl-1-(1-methylethyl)-, (1S,4R,4aS,8aR)- | C <sub>15</sub> H <sub>26</sub> O              | FSTP   | 51.40       | 3.51         | 584 | 91    |
| 2(1H)-Naphthalenone, 4a,5,6,7,8,8a-hexahydro-7α-isopropyl-4aβ,8aβ-dimethyl-                   | C <sub>15</sub> H <sub>24</sub> O              | FSTP   | 51.90       | 3.43         | 662 | 91    |
| δ-Guaiene                                                                                     | C <sub>15</sub> H <sub>24</sub>                | STP    | 52.00       | 3.75         | 669 | 93    |
| β-Caryophyllene                                                                               | C <sub>15</sub> H <sub>24</sub>                | STP    | 52.10       | 4.09         | 574 | 32    |
| τ-Cadinol                                                                                     | C <sub>15</sub> H <sub>26</sub> O              | FSTP   | 52.10       | 3.71         | 640 | 42    |
| Pogostol                                                                                      | C <sub>15</sub> H <sub>26</sub> O              | FSTP   | 52.20       | 3.79         | 574 | 61    |
| 1H-Cycloprop[e]azulen-4-ol, decahydro-1,1,4,7-tetramethyl-, [1aR-(1aα,4β,4aβ,7α,7aβ,7ba)]-    | C <sub>15</sub> H <sub>26</sub> O              | FSTP   | 52.20       | 3.75         | 494 | 51    |
| α-Guaiene                                                                                     | C <sub>15</sub> H <sub>24</sub>                | STP    | 52.30       | 3.85         | 641 | 72    |
| 5β,7βH,10α-Eudesm-11-en-1α-ol                                                                 | C <sub>15</sub> H <sub>26</sub> O              | FSTP   | 52.40       | 0.42         | 651 | 48    |



Supplementary Table 2. (Cont.)

| Compound Name                                                                                   | Mol. formula                                   | Class. | RT I (min.) | RT II (sec.) | MF  | P (%) |
|-------------------------------------------------------------------------------------------------|------------------------------------------------|--------|-------------|--------------|-----|-------|
| 10s,11s-Himachala-3(12),4-diene                                                                 | C <sub>15</sub> H <sub>24</sub>                | STP    | 52.40       | 3.85         | 861 | 41    |
| Rosifoliol                                                                                      | C <sub>15</sub> H <sub>26</sub> O              | FSTP   | 52.50       | 4.05         | 591 | 51    |
| Aristolene                                                                                      | C <sub>15</sub> H <sub>24</sub>                | STP    | 52.50       | 4.19         | 731 | 58    |
| Agarospinol                                                                                     | C <sub>15</sub> H <sub>26</sub> O              | FSTP   | 52.80       | 4.07         | 525 | 37    |
| Hedycaryol                                                                                      | C <sub>15</sub> H <sub>26</sub> O              | FSTP   | 52.80       | 3.99         | 592 | 71    |
| Maaliol                                                                                         | C <sub>15</sub> H <sub>26</sub> O              | FSTP   | 52.80       | 4.09         | 690 | 56    |
| Globulol                                                                                        | C <sub>15</sub> H <sub>26</sub> O              | FSTP   | 52.80       | 4.31         | 634 | 59    |
| Cubenol                                                                                         | C <sub>15</sub> H <sub>26</sub> O              | FSTP   | 52.90       | 4.13         | 671 | 66    |
| 2-Naphthalenol, 2,3,4,4a,5,6,7-octahydro-1,4a-dimethyl-7-(2-hydroxy-1-methylethyl)              | C <sub>15</sub> H <sub>26</sub> O <sub>2</sub> | FSTP   | 52.90       | 4.52         | 593 | 77    |
| β-BERGAMOTENE                                                                                   | C <sub>15</sub> H <sub>24</sub>                | STP    | 52.90       | 4.48         | 700 | 58    |
| Ledol                                                                                           | C <sub>15</sub> H <sub>26</sub> O              | FSTP   | 52.90       | 5.81         | 735 | 65    |
| 1,2-Naphthalenedione, 3,8-dimethyl-5-(1-methylethyl)-                                           | C <sub>15</sub> H <sub>16</sub> O <sub>2</sub> | FSTP   | 53.00       | 4.58         | 835 | 31    |
| Guaiol                                                                                          | C <sub>15</sub> H <sub>26</sub> O              | FSTP   | 53.00       | 4.09         | 672 | 68    |
| (1S,7S,8aR)-1,8a-Dimethyl-7-(prop-1-en-2-yl)-1,2,3,7,8,8a-hexahydronaphthalene                  | C <sub>15</sub> H <sub>22</sub>                | STP    | 53.00       | 4.38         | 758 | 95    |
| α-Bisabolol oxide B                                                                             | C <sub>15</sub> H <sub>26</sub> O <sub>2</sub> | FSTP   | 53.00       | 3.55         | 701 | 77    |
| Terranol                                                                                        | C <sub>15</sub> H <sub>26</sub> O              | FSTP   | 53.10       | 5.28         | 595 | 77    |
| β-Longipinene                                                                                   | C <sub>15</sub> H <sub>24</sub>                | STP    | 53.20       | 4.33         | 704 | 78    |
| Cedrol                                                                                          | C <sub>15</sub> H <sub>26</sub> O              | FSTP   | 53.30       | 4.33         | 712 | 91    |
| α-coastal                                                                                       | C <sub>15</sub> H <sub>22</sub> O              | FSTP   | 53.50       | 4.50         | 892 | 61    |
| Zonarene                                                                                        | C <sub>15</sub> H <sub>24</sub>                | STP    | 53.60       | 5.00         | 685 | 70    |
| 5-Azulenemethanol, 1,2,3,3a,4,5,6,7-octahydro-α,α,3,8-tetramethyl-, [3S-(3α,3αβ,5α)]-           | C <sub>15</sub> H <sub>26</sub> O              | FSTP   | 53.60       | 3.93         | 789 | 20    |
| α-copaene                                                                                       | C <sub>15</sub> H <sub>24</sub> O              | FSTP   | 53.90       | 4.44         | 552 | 41    |
| Valerenal                                                                                       | C <sub>15</sub> H <sub>22</sub> O              | FSTP   | 54.00       | 4.58         | 735 | 61    |
| Sesquisabinene                                                                                  | C <sub>15</sub> H <sub>26</sub> O              | FSTP   | 54.10       | 3.89         | 612 | 20    |
| (3bR,4S,7aS)-7,7,8,8-Tetramethyloctahydro-2,3b-methanocyclopenta[1,3]cyclopropa[1,2]benzen-4-ol | C <sub>15</sub> H <sub>24</sub> O              | FSTP   | 54.10       | 4.27         | 619 | 21    |
| 1-Buten-1-ol, 2-methyl-4-(2,6,6-trimethyl-1-cyclohexen-1-yl)-, formate, (E)-                    | C <sub>15</sub> H <sub>24</sub> O <sub>2</sub> | FSTP   | 54.30       | 4.78         | 558 | 25    |
| α.-Eudesmol                                                                                     | C <sub>15</sub> H <sub>24</sub> O              | FSTP   | 54.60       | 4.21         | 641 | 31    |
| Valerenol                                                                                       | C <sub>15</sub> H <sub>24</sub> O              | FSTP   | 54.70       | 4.36         | 537 | 61    |

Supplementary Table 2. (Cont.)

| Compound Name                                                                                            | Mol. formula                                   | Class. | RT I (min.) | RT II (sec.) | MF  | P (%) |
|----------------------------------------------------------------------------------------------------------|------------------------------------------------|--------|-------------|--------------|-----|-------|
| $\alpha$ -isocomene                                                                                      | C <sub>15</sub> H <sub>24</sub>                | STP    | 54.90       | 4.21         | 589 | 57    |
| Acorenone B                                                                                              | C <sub>15</sub> H <sub>24</sub> O              | FSTP   | 54.90       | 4.23         | 625 | 44    |
| Valencene                                                                                                | C <sub>15</sub> H <sub>24</sub>                | STP    | 54.90       | 4.21         | 602 | 49    |
| Carvyl angelate                                                                                          | C <sub>15</sub> H <sub>22</sub> O <sub>2</sub> | FSTP   | 55.00       | 3.77         | 641 | 34    |
| Spathulenol                                                                                              | C <sub>15</sub> H <sub>24</sub> O              | FSTP   | 55.00       | 4.33         | 641 | 61    |
| Widdrenal                                                                                                | C <sub>15</sub> H <sub>22</sub> O              | FSTP   | 55.00       | 4.42         | 605 | 72    |
| Germacatrienol                                                                                           | C <sub>15</sub> H <sub>24</sub> O              | FSTP   | 55.10       | 4.36         | 658 | 40    |
| Epiprocurcumenol                                                                                         | C <sub>15</sub> H <sub>22</sub> O              | FSTP   | 55.20       | 4.09         | 619 | 11    |
| 2,2,6-Trimethyl-1-(2-methyl-cyclobut-2-enyl)-hepta-4,6-dien-3-one                                        | C <sub>15</sub> H <sub>22</sub> O              | FSTP   | 55.20       | 4.09         | 694 | 61    |
| 2-((3R,3aR,3bS,4R,7R,7aS)-3,7-Dimethyloctahydro-1H-cyclopenta[1,3]cyclopropa[1,2]benzen-4-yl)propan-2-ol | C <sub>15</sub> H <sub>26</sub> O              | FSTP   | 55.90       | 3.81         | 592 | 91    |
| Solstitialin A                                                                                           | C <sub>15</sub> H <sub>20</sub> O <sub>5</sub> | FSTP   | 56.00       | 4.82         | 714 | 59    |
| Calarene epoxide                                                                                         | C <sub>15</sub> H <sub>24</sub> O              | FSTP   | 56.10       | 5.24         | 725 | 51    |
| $\alpha$ -Santalol                                                                                       | C <sub>15</sub> H <sub>24</sub> O              | FSTP   | 56.10       | 4.05         | 760 | 42    |
| $\alpha$ -cyperone                                                                                       | C <sub>15</sub> H <sub>20</sub> O              | FSTP   | 56.60       | 4.38         | 459 | 55    |
| 2,2,5-Trimethyl-1-phenylhexa-3,4-dien-1-one                                                              | C <sub>15</sub> H <sub>18</sub> O              | FSTP   | 56.80       | 4.82         | 627 | 64    |
| 6-Dehydropetasol                                                                                         | C <sub>15</sub> H <sub>20</sub> O <sub>2</sub> | FSTP   | 56.80       | 4.86         | 683 | 41    |
| (R)-1,5,8-Trimethyl-6,7,8,9-tetrahydronaphtho[2,1-b]furan                                                | C <sub>15</sub> H <sub>18</sub> O              | FSTP   | 57.20       | 4.72         | 714 | 4     |
| Cycloseychellene                                                                                         | C <sub>15</sub> H <sub>24</sub>                | STP    | 57.20       | 5.59         | 665 | 7     |
| Elemol                                                                                                   | C <sub>15</sub> H <sub>26</sub> O              | FSTP   | 57.30       | 5.73         | 668 | 20    |
| Thujopsene-I3                                                                                            | C <sub>15</sub> H <sub>24</sub>                | STP    | 57.40       | 5.93         | 722 | 8     |
| $\alpha$ -Hexylcinnamaldehyde                                                                            | C <sub>15</sub> H <sub>20</sub> O              | FSTP   | 57.50       | 4.44         | 726 | 20    |
| Vetiselinenol                                                                                            | C <sub>15</sub> H <sub>24</sub> O              | FSTP   | 57.50       | 4.52         | 692 | 4     |
| Eudesmenol                                                                                               | C <sub>15</sub> H <sub>26</sub> O              | FSTP   | 57.60       | 5.46         | 652 | 6     |
| Khusimyl acid                                                                                            | C <sub>15</sub> H <sub>22</sub> O              | FSTP   | 57.90       | 4.86         | 585 | 6     |
| 7-Isopropenyl-1,4a-dimethyl-4,4a,5,6,7,8-hexahydro-3H-naphthalen-2-one                                   | C <sub>15</sub> H <sub>22</sub> O              | FSTP   | 58.00       | 4.64         | 669 | 10    |
| 3,7-Cyclodecadien-1-one, 3,7-dimethyl-10-(1-methylethylidene)-, (E,E)-                                   | C <sub>15</sub> H <sub>22</sub> O              | FSTP   | 58.20       | 5.04         | 721 | 15    |
| 5(1H)-Azulenone, 2,4,6,7,8,8a-hexahydro-3,8-dimethyl-4-(1-methylethylidene)-, (8S-cis)-                  | C <sub>15</sub> H <sub>22</sub> O              | FSTP   | 58.30       | 5.63         | 615 | 11    |
| Valerenic acid                                                                                           | C <sub>15</sub> H <sub>22</sub> O <sub>2</sub> | FSTP   | 58.60       | 5.73         | 741 | 9     |

Supplementary Table 2. (Cont.)

| Compound Name                                                                                           | Mol. formula                                   | Class. | RT I (min.) | RT II (sec.) | MF  | P (%) |
|---------------------------------------------------------------------------------------------------------|------------------------------------------------|--------|-------------|--------------|-----|-------|
| 6-Isopropenyl-4,8a-dimethyl-4a,5,6,7,8,8a-hexahydro-1H-naphthalen-2-one                                 | C <sub>15</sub> H <sub>22</sub> O              | FSTP   | 58.70       | 5.14         | 676 | 13    |
| 1H-3a,7-Methanoazulene-6-methanol, 2,3,4,7,8,8a-hexahydro-3,8,8-trimethyl-, [3R-(3α,3αβ,7β,8αα)]-       | C <sub>15</sub> H <sub>24</sub> O              | FSTP   | 58.80       | 0.69         | 729 | 12    |
| 4-(3,3-Dimethyl-but-1-ynyl)-4-hydroxy-2,6,6-trimethylcyclohex-2-enone                                   | C <sub>15</sub> H <sub>22</sub> O <sub>2</sub> | FSTP   | 58.90       | 5.32         | 687 | 4     |
| (S,Z)-2-Methyl-6-(p-tolyl)hept-2-en-1-ol                                                                | C <sub>15</sub> H <sub>22</sub> O              | FSTP   | 58.90       | 4.94         | 677 | 9     |
| 7-(1,3-Dimethylbuta-1,3-dienyl)-1,6,6-trimethyl-3,8-dioxatricyclo[5.1.0.0(2,4)]octane                   | C <sub>15</sub> H <sub>22</sub> O <sub>2</sub> | FSTP   | 59.40       | 4.98         | 652 | 6     |
| Valerenic acid                                                                                          | C <sub>15</sub> H <sub>22</sub> O <sub>2</sub> | FSTP   | 58.60       | 5.73         | 741 | 9     |
| 6-Isopropenyl-4,8a-dimethyl-4a,5,6,7,8,8a-hexahydro-1H-naphthalen-2-one                                 | C <sub>15</sub> H <sub>22</sub> O              | FSTP   | 58.70       | 5.14         | 676 | 13    |
| 1H-3a,7-Methanoazulene-6-methanol, 2,3,4,7,8,8a-hexahydro-3,8,8-trimethyl-, [3R-(3α,3αβ,7β,8αα)]-       | C <sub>15</sub> H <sub>24</sub> O              | FSTP   | 58.80       | 0.69         | 729 | 12    |
| γ-Gurjunenepoxide                                                                                       | C <sub>15</sub> H <sub>24</sub> O              | FSTP   | 59.50       | 4.64         | 690 | 19    |
| (E,Z)-α-Farnesene                                                                                       | C <sub>15</sub> H <sub>24</sub>                | STP    | 59.80       | 0.26         | 657 | 8     |
| 1(2H)Phenanthrenone, 3,4,4a,9,10,10a-hexahydro-4a-methyl-                                               | C <sub>15</sub> H <sub>18</sub> O              | FSTP   | 60.00       | 4.80         | 759 | 10    |
| (R)-3-Methylene-6-((S)-1,2,2-trimethylcyclopentyl)cyclohex-1-ene                                        | C <sub>15</sub> H <sub>24</sub>                | STP    | 60.20       | 5.95         | 763 | 5     |
| 1H-Benzocyclohepten-7-ol, 2,3,4,4a,5,6,7,8-octahydro-1,1,4a,7-tetramethyl-, cis-                        | C <sub>15</sub> H <sub>26</sub> O              | FSTP   | 60.30       | 5.93         | 674 | 12    |
| Ylangenal                                                                                               | C <sub>15</sub> H <sub>22</sub> O              | FSTP   | 60.40       | 5.77         | 516 | 22    |
| Proximadiol                                                                                             | C <sub>15</sub> H <sub>28</sub> O <sub>2</sub> | FSTP   | 60.60       | 5.16         | 711 | 23    |
| 3H-Cyclodeca[b]furan-2-one, 4,9-dihydroxy-6-methyl-3,10-dimethylene-3a,4,7,8,9,10,11,11a-octahydro-     | C <sub>15</sub> H <sub>20</sub> O <sub>4</sub> | FSTP   | 60.80       | 4.70         | 666 | 10    |
| Nootkatone                                                                                              | C <sub>15</sub> H <sub>22</sub> O              | FSTP   | 61.00       | 5.28         | 740 | 12    |
| β-acoradienol                                                                                           | C <sub>15</sub> H <sub>24</sub> O              | FSTP   | 61.00       | 4.23         | 689 | 29    |
| 2H-Cyclopropa[a]naphthalen-2-one, 1,1a,4,5,6,7,7a,7b-octahydro-1,1,7,7a-tetramethyl-, (1aa,7a,7aa,7ba)- | C <sub>15</sub> H <sub>22</sub> O              | FSTP   | 61.00       | 5.20         | 703 | 29    |
| Dehydrofukinone                                                                                         | C <sub>15</sub> H <sub>22</sub> O              | FSTP   | 61.10       | 5.38         | 674 | 41    |
| Caryophylladienol                                                                                       | C <sub>15</sub> H <sub>26</sub> O              | FSTP   | 61.10       | 6.01         | 667 | 16    |
| Elemadiol                                                                                               | C <sub>15</sub> H <sub>26</sub> O <sub>2</sub> | FSTP   | 61.30       | 4.82         | 656 | 14    |
| β-Eudesmol                                                                                              | C <sub>15</sub> H <sub>26</sub> O              | FSTP   | 61.60       | 5.12         | 656 | 12    |
| 4,4-Dimethyl-3-(3-methylbut-2-enylidene)octane-2,7-dione                                                | C <sub>15</sub> H <sub>24</sub> O <sub>2</sub> | FSTP   | 61.70       | 5.63         | 584 | 7     |
| 4,6,6-Trimethyl-2-(3-methylbuta-1,3-dienyl)-3-oxatricyclo[5.1.0.0(2,4)]octane                           | C <sub>15</sub> H <sub>22</sub> O              | FSTP   | 61.90       | 6.09         | 609 | 15    |
| Cyperotundone                                                                                           | C <sub>15</sub> H <sub>22</sub> O              | FSTP   | 62.10       | 4.88         | 677 | 7     |
| 2-Cyclohexene-1-carboxaldehyde, 2,6-dimethyl-6-(4-methyl-3-pentenyl)-                                   | C <sub>15</sub> H <sub>24</sub> O              | FSTP   | 62.20       | 4.33         | 618 | 25    |
| 6-Isopropenyl-4,8a-dimethyl-1,2,3,5,6,7,8,8a-octahydro-naphthalen-2-ol                                  | C <sub>15</sub> H <sub>24</sub> O              | FSTP   | 62.60       | 1.96         | 666 | 18    |

Supplementary Table 2. (Cont.)

| Compound Name                                                                           | Mol. formula                                   | Class. | RT I (min.) | RT II (sec.) | MF  | P (%) |
|-----------------------------------------------------------------------------------------|------------------------------------------------|--------|-------------|--------------|-----|-------|
| Hexahydronaphthalenone                                                                  | C <sub>15</sub> H <sub>22</sub> O              | FSTP   | 62.60       | 5.83         | 708 | 11    |
| Isovelleral                                                                             | C <sub>15</sub> H <sub>20</sub> O <sub>2</sub> | FSTP   | 62.70       | 5.77         | 572 | 94    |
| 6-(p-Tolyl)-2-methyl-2-heptenol, trans-                                                 | C <sub>15</sub> H <sub>22</sub> O              | FSTP   | 62.70       | 0.99         | 675 | 18    |
| 1(2H)-Naphthalenone, octahydro-4,8a-dimethyl-6-(1-methylethenyl)-, (4α,4aβ,6α,8aβ)-     | C <sub>15</sub> H <sub>24</sub> O              | FSTP   | 63.00       | 0.87         | 608 | 65    |
| Alloaromadendrene oxide                                                                 | C <sub>15</sub> H <sub>24</sub> O              | FSTP   | 63.00       | 5.08         | 639 | 10    |
| Uvidin C                                                                                | C <sub>15</sub> H <sub>26</sub> O <sub>2</sub> | FSTP   | 63.10       | 5.85         | 553 | 13    |
| Costal                                                                                  | C <sub>15</sub> H <sub>22</sub> O              | FSTP   | 63.10       | 5.95         | 590 | 15    |
| 1,1,4,7-Tetramethyl-1a,2,3,4,6,7,7a,7b-octahydro-1H-cyclopropa[e]azulene                | C <sub>15</sub> H <sub>24</sub>                | STP    | 63.20       | 5.08         | 677 | 17    |
| α-Farnesene                                                                             | C <sub>15</sub> H <sub>24</sub>                | STP    | 63.50       | 0.40         | 659 | 15    |
| Isoaromadendrene epoxide                                                                | C <sub>15</sub> H <sub>24</sub> O              | FSTP   | 63.50       | 5.24         | 529 | 32    |
| 2-((2R,4aR,8aR)-4a,8-Dimethyl-1,2,3,4,4a,5,6,8a-octahydronaphthalen-2-yl)prop-2-en-1-ol | C <sub>15</sub> H <sub>24</sub> O              | FSTP   | 63.50       | 5.20         | 580 | 40    |
| 4-Isopropyl-6-methyl-3,4,4a,7,8,8a-hexahydronaphthalene-1-carbaldehyde                  | C <sub>15</sub> H <sub>22</sub> O              | FSTP   | 63.50       | 5.20         | 547 | 15    |
| Bergamoto                                                                               | C <sub>15</sub> H <sub>24</sub> O              | FSTP   | 63.80       | 0.73         | 607 | 23    |
| Silphiperfol-4,7(14)-diene                                                              | C <sub>15</sub> H <sub>22</sub>                | STP    | 63.80       | 0.65         | 504 | 25    |
| 1-Cyclopropene-1-pentanol, α,ε,ε,2-tetramethyl-3-(1-methylethenyl)-                     | C <sub>15</sub> H <sub>26</sub> O              | FSTP   | 63.90       | 5.54         | 698 | 15    |
| Ledene oxide                                                                            | C <sub>15</sub> H <sub>24</sub> O              | FSTP   | 64.30       | 0.77         | 552 | 7     |
| Carabrol                                                                                | C <sub>15</sub> H <sub>22</sub> O <sub>3</sub> | FSTP   | 64.30       | 4.72         | 549 | 14    |
| γ-gurjunene                                                                             | C <sub>15</sub> H <sub>24</sub>                | STP    | 64.30       | 5.20         | 534 | 26    |
| 10-Epigazaniolide                                                                       | C <sub>15</sub> H <sub>18</sub> O <sub>2</sub> | FSTP   | 64.40       | 1.55         | 593 | 15    |
| 14-Hydroxycaryophyllene                                                                 | C <sub>15</sub> H <sub>24</sub> O              | FSTP   | 64.40       | 5.65         | 557 | 9     |
| 7-Tetracyclo[6.2.1.0(3.8)0(3.9)]undecanol, 4,4,11,11-tetramethyl-                       | C <sub>15</sub> H <sub>24</sub> O              | FSTP   | 64.80       | 5.87         | 562 | 24    |
| Isospathulenol                                                                          | C <sub>15</sub> H <sub>24</sub> O              | FSTP   | 65.50       | 5.50         | 653 | 29    |
| 2,4a,5,8a-Tetramethyl-1,2,3,4,4a,7,8,8a-octahydronaphthalen-1-yl formate (isomer 1)     | C <sub>15</sub> H <sub>24</sub> O <sub>2</sub> | FSTP   | 65.50       | 0.52         | 547 | 11    |
| Cumanin                                                                                 | C <sub>15</sub> H <sub>22</sub> O <sub>4</sub> | FSTP   | 66.50       | 1.88         | 528 | 20    |
| 11,11-Dimethyl-4,8-dimethylenebicyclo[7.2.0]undecan-3-ol                                | C <sub>15</sub> H <sub>24</sub> O              | FSTP   | 66.70       | 0.58         | 598 | 5     |
| (2S,4aR,8aR)-4a,8-Dimethyl-2-(prop-1-en-2-yl)-1,2,3,4,4a,5,6,8a-octahydronaphthalene    | C <sub>15</sub> H <sub>24</sub>                | STP    | 66.80       | 0.65         | 549 | 46    |
| α-Panasinsen                                                                            | C <sub>15</sub> H <sub>24</sub>                | STP    | 66.80       | 0.62         | 547 | 26    |
| 3-Cyclohexene-1-ethanol, α-ethenyl-α,3-dimethyl-6-(1-methylethylidene)-                 | C <sub>15</sub> H <sub>24</sub> O              | FSTP   | 66.90       | 5.56         | 556 | 28    |

Supplementary Table 2. (Cont.)

| Compound Name                                                                                             | Mol. formula                                   | Class. | RT I (min.) | RT II (sec.) | MF  | P (%) |
|-----------------------------------------------------------------------------------------------------------|------------------------------------------------|--------|-------------|--------------|-----|-------|
| 2,3,3-Trimethyl-2-(3-methylbuta-1,3-dienyl)-6-methylenecyclohexanone                                      | C <sub>15</sub> H <sub>22</sub> O              | FSTP   | 66.90       | 6.19         | 686 | 19    |
| Jaeskeanadiol                                                                                             | C <sub>15</sub> H <sub>26</sub> O <sub>2</sub> | FSTP   | 67.00       | 1.09         | 590 | 60    |
| Parthenolide                                                                                              | C <sub>15</sub> H <sub>20</sub> O <sub>3</sub> | FSTP   | 67.00       | 6.13         | 614 | 31    |
| Valerenolic acid                                                                                          | C <sub>15</sub> H <sub>22</sub> O <sub>3</sub> | FSTP   | 67.00       | 5.57         | 556 | 91    |
| 7-(hydroxymethyl)-2,2,4-trimethyl-3,3a,4,8a-tetrahydro-1H-azulen-6-yl]methanol                            | C <sub>15</sub> H <sub>24</sub> O <sub>2</sub> | FSTP   | 67.10       | 6.13         | 578 | 29    |
| 7-Oxabicyclo[4.1.0]heptane, 2,2,6-trimethyl-1-(3-methyl-1,3-butadienyl)-5-methylene-                      | C <sub>15</sub> H <sub>22</sub> O              | FSTP   | 67.10       | 6.11         | 583 | 26    |
| α-Bisabolene epoxide                                                                                      | C <sub>15</sub> H <sub>24</sub> O              | FSTP   | 67.30       | 6.21         | 591 | 50    |
| Aromadendrene oxide                                                                                       | C <sub>15</sub> H <sub>24</sub> O              | FSTP   | 67.30       | 5.85         | 610 | 66    |
| Squamulosone                                                                                              | C <sub>15</sub> H <sub>22</sub> O              | FSTP   | 67.60       | 5.97         | 570 | 64    |
| Verrucarol                                                                                                | C <sub>15</sub> H <sub>22</sub> O <sub>4</sub> | FSTP   | 67.80       | 0.40         | 680 | 79    |
| 12-Hydroxy-6-epi-albrassitriol                                                                            | C <sub>15</sub> H <sub>26</sub> O <sub>2</sub> | FSTP   | 67.90       | 6.09         | 596 | 52    |
| Curcumenol                                                                                                | C <sub>15</sub> H <sub>22</sub> O <sub>2</sub> | FSTP   | 67.90       | 0.44         | 638 | 28    |
| Shizukanolide                                                                                             | C <sub>15</sub> H <sub>18</sub> O <sub>2</sub> | FSTP   | 68.20       | 0.18         | 600 | 30    |
| Longiverbenone                                                                                            | C <sub>15</sub> H <sub>22</sub> O              | FSTP   | 68.30       | 6.21         | 598 | 59    |
| Asperilin                                                                                                 | C <sub>15</sub> H <sub>20</sub> O <sub>3</sub> | FSTP   | 68.30       | 5.75         | 619 | 65    |
| Dihydrocolumellarin                                                                                       | C <sub>15</sub> H <sub>22</sub> O <sub>2</sub> | FSTP   | 68.50       | 5.93         | 912 | 30    |
| Solavetivone                                                                                              | C <sub>15</sub> H <sub>22</sub> O              | FSTP   | 68.60       | 6.15         | 593 | 71    |
| Occidentalol                                                                                              | C <sub>15</sub> H <sub>24</sub> O              | FSTP   | 68.60       | 3.87         | 727 | 39    |
| β-Cyclodihydrocostunolide                                                                                 | C <sub>15</sub> H <sub>22</sub> O <sub>2</sub> | FSTP   | 68.70       | 0.62         | 565 | 66    |
| Arctiol                                                                                                   | C <sub>15</sub> H <sub>26</sub> O <sub>2</sub> | FSTP   | 68.80       | 3.75         | 585 | 58    |
| γ-Elemene                                                                                                 | C <sub>15</sub> H <sub>24</sub>                | STP    | 69.10       | 5.83         | 604 | 65    |
| (2R,3R,4aR,5S,8aS)-2-Hydroxy-4a,5-dimethyl-3-(prop-1-en-2-yl)-2,3,4,4a,5,6-hexahydronaphthalen-1(8aH)-one | C <sub>15</sub> H <sub>22</sub> O <sub>2</sub> | FSTP   | 69.10       | 0.36         | 605 | 35    |
| α-Humulene-14-oic acid                                                                                    | C <sub>15</sub> H <sub>22</sub> O <sub>2</sub> | FSTP   | 69.30       | 0.79         | 603 | 54    |
| Nordeoxynivalenol                                                                                         | C <sub>15</sub> H <sub>22</sub> O <sub>3</sub> | FSTP   | 69.30       | 1.33         | 654 | 33    |
| Humulenol-II                                                                                              | C <sub>15</sub> H <sub>24</sub> O              | FSTP   | 69.40       | 6.17         | 654 | 61    |
| Velleral                                                                                                  | C <sub>15</sub> H <sub>20</sub> O <sub>2</sub> | FSTP   | 69.50       | 0.46         | 585 | 40    |
| α-selinene                                                                                                | C <sub>15</sub> H <sub>24</sub> O              | FSTP   | 69.60       | 6.19         | 628 | 19    |
| (3R,3aR,5R,6R,7aR)-3,6-Dimethyl-5-(prop-1-en-2-yl)-6-vinylhexahydrobenzofuran-2(3H)-one                   | C <sub>15</sub> H <sub>22</sub> O <sub>2</sub> | FSTP   | 69.70       | 5.81         | 638 | 48    |

Supplementary Table 2. (Cont.)

| Compound Name                                                                                      | Mol. formula                                   | Class. | RT I (min.) | RT II (sec.) | MF  | P (%) |
|----------------------------------------------------------------------------------------------------|------------------------------------------------|--------|-------------|--------------|-----|-------|
| Calarene                                                                                           | C <sub>15</sub> H <sub>24</sub>                | STP    | 69.70       | 4.07         | 609 | 71    |
| 4aH-Cycloprop[e]azulen-4a-ol, decahydro-1,1,4,7-tetramethyl-, [1aR-(1aα,4β,4aβ,7α,7aβ,7ba)]-       | C <sub>15</sub> H <sub>26</sub> O              | FSTP   | 70.10       | 1.39         | 479 | 25    |
| Isoalantolactone                                                                                   | C <sub>15</sub> H <sub>20</sub> O <sub>2</sub> | FSTP   | 70.50       | 1.27         | 610 | 18    |
| Aromaticin                                                                                         | C <sub>15</sub> H <sub>20</sub> O <sub>2</sub> | FSTP   | 70.60       | 6.19         | 694 | 37    |
| (E)-6-Hydroxy-2-methyl-6-(4-methylphenyl)hept-2-enoic acid                                         | C <sub>15</sub> H <sub>20</sub> O <sub>3</sub> | FSTP   | 70.70       | 2.36         | 619 | 81    |
| Ambrosin                                                                                           | C <sub>15</sub> H <sub>18</sub> O <sub>3</sub> | FSTP   | 70.80       | 1.21         | 488 | 64    |
| (2S)-2-((1R,3aR,4R,5S,7aS)-1,7a-Dimethyloctahydro-1H-1,2,4-(epimethanetriyl)inden-5-yl)propan-1-ol | C <sub>15</sub> H <sub>24</sub> O              | FSTP   | 70.80       | 3.81         | 639 | 97    |
| Reynosin                                                                                           | C <sub>15</sub> H <sub>20</sub> O <sub>3</sub> | FSTP   | 70.80       | 0.69         | 493 | 81    |
| β-Cyclocostunolide                                                                                 | C <sub>15</sub> H <sub>20</sub> O <sub>2</sub> | FSTP   | 70.90       | 1.43         | 497 | 94    |
| Velleral                                                                                           | C <sub>15</sub> H <sub>20</sub> O <sub>2</sub> | FSTP   | 69.50       | 0.46         | 585 | 40    |
| α-selinene                                                                                         | C <sub>15</sub> H <sub>24</sub> O              | FSTP   | 69.60       | 6.19         | 628 | 19    |
| 6-(2-Hydroxypropan-2-yl)-4,8a-dimethyl-2,3,4,6,7,8-hexahydro-1H-naphthalen-1-ol                    | C <sub>15</sub> H <sub>26</sub> O <sub>2</sub> | FSTP   | 71.30       | 1.90         | 641 | 44    |
| 2H-2,4a-Ethanonaphthalen-8(5H)-one, hexahydro-2,5,5-trimethyl-                                     | C <sub>15</sub> H <sub>24</sub> O              | FSTP   | 71.40       | 0.28         | 632 | 49    |
| 2,5-Dimethylbenzophenone                                                                           | C <sub>15</sub> H <sub>14</sub> O              | FSTP   | 71.40       | 0.69         | 738 | 20    |
| 4a,7-Methano-4aH-naphth[1,8a-b]oxirene, octahydro-4,4,8,8-tetramethyl-                             | C <sub>15</sub> H <sub>24</sub> O              | FSTP   | 71.40       | 0.36         | 632 | 61    |
| 2,4-Dimethylbenzophenone                                                                           | C <sub>15</sub> H <sub>14</sub> O              | FSTP   | 71.40       | 0.69         | 654 | 22    |
| (1S,4aR,7R)-1,4a-Dimethyl-7-(prop-1-en-2-yl)-1,2,3,4,4a,5,6,7-octahydronaphthalene                 | C <sub>15</sub> H <sub>24</sub>                | STP    | 71.50       | 1.31         | 567 | 86    |
| Bohlmann k2631                                                                                     | C <sub>15</sub> H <sub>20</sub> O <sub>2</sub> | FSTP   | 71.50       | 1.35         | 668 | 18    |
| Nootkaton epoxide                                                                                  | C <sub>15</sub> H <sub>22</sub> O <sub>2</sub> | FSTP   | 71.70       | 1.09         | 682 | 21    |
| 11,13-Dihydrolactucin                                                                              | C <sub>15</sub> H <sub>18</sub> O <sub>3</sub> | FSTP   | 71.80       | 5.73         | 869 | 80    |
| Isopetasol                                                                                         | C <sub>15</sub> H <sub>22</sub> O <sub>2</sub> | FSTP   | 72.20       | 1.07         | 675 | 47    |
| α-Eudesmol                                                                                         | C <sub>15</sub> H <sub>22</sub> O <sub>2</sub> | FSTP   | 72.40       | 1.03         | 675 | 48    |
| Limonenol                                                                                          | C <sub>15</sub> H <sub>24</sub> O <sub>2</sub> | FSTP   | 72.70       | 1.96         | 535 | 83    |
| Tourneforin                                                                                        | C <sub>15</sub> H <sub>18</sub> O <sub>3</sub> | FSTP   | 72.80       | 2.34         | 782 | 42    |
| 1-Penten-3-one, 4-methyl-1-[2,6,6-trimethyl-2-cyclohexen-1-yl]-                                    | C <sub>15</sub> H <sub>24</sub> O              | FSTP   | 72.90       | 3.61         | 720 | 28    |
| Spirafolide                                                                                        | C <sub>15</sub> H <sub>18</sub> O <sub>3</sub> | FSTP   | 72.90       | 2.46         | 701 | 78    |
| 7-Methyl-3-methylidene-6-(3-oxobutyl)-4,7,8,8a-tetrahydro-3aH-cyclohepta[b]furan-2-one             | C <sub>15</sub> H <sub>20</sub> O <sub>3</sub> | FSTP   | 73.30       | 5.97         | 755 | 91    |
| Hydroxymurolene                                                                                    | C <sub>15</sub> H <sub>24</sub> O              | FSTP   | 73.60       | 6.33         | 649 | 81    |

Supplementary Table 2. (Cont.)

| Compound Name                                                                          | Mol. formula                                   | Class. | RT I (min.) | RT II (sec.) | MF  | P (%) |
|----------------------------------------------------------------------------------------|------------------------------------------------|--------|-------------|--------------|-----|-------|
| Cedrandiol                                                                             | C <sub>15</sub> H <sub>26</sub> O <sub>2</sub> | FSTP   | 73.90       | 1.41         | 545 | 21    |
| α-cedrene                                                                              | C <sub>15</sub> H <sub>24</sub>                | STP    | 74.00       | 2.04         | 698 | 82    |
| 4,7-Methanofuro[3,2-c]oxacycloundecin-6(4H)-one, 7,8,9,12-tetrahydro-3,11-dimethyl-    | C <sub>15</sub> H <sub>18</sub> O <sub>3</sub> | FSTP   | 74.00       | 3.09         | 717 | 72    |
| Germacrene D                                                                           | C <sub>15</sub> H <sub>24</sub>                | STP    | 74.20       | 1.23         | 774 | 76    |
| Phomenone                                                                              | C <sub>15</sub> H <sub>20</sub> O <sub>4</sub> | FSTP   | 74.20       | 0.89         | 525 | 94    |
| Shyobunol                                                                              | C <sub>15</sub> H <sub>26</sub> O              | FSTP   | 75.40       | 0.54         | 710 | 93    |
| 1,8-Cyclopentadecadiyne                                                                | C <sub>15</sub> H <sub>22</sub>                | STP    | 76.00       | 0.46         | 750 | 21    |
| 3-Oxo-10(14)-epoxyguai-11(13)-en-6,12-olide                                            | C <sub>15</sub> H <sub>18</sub> O <sub>3</sub> | FSTP   | 76.20       | 3.17         | 742 | 54    |
| 2,7-Cyclodecadiene-1-methanol, α,α,4,8-tetramethyl-                                    | C <sub>15</sub> H <sub>26</sub> O              | FSTP   | 76.60       | 1.43         | 546 | 91    |
| Aureonitol                                                                             | C <sub>15</sub> H <sub>20</sub> O <sub>3</sub> | FSTP   | 76.70       | 4.60         | 551 | 92    |
| 7-Methoxy-3,4-dihydro-1(2H)-phenanthrenone                                             | C <sub>15</sub> H <sub>14</sub> O <sub>2</sub> | FSTP   | 77.20       | 2.12         | 488 | 48    |
| Santamarine                                                                            | C <sub>15</sub> H <sub>20</sub> O <sub>3</sub> | FSTP   | 77.30       | 3.13         | 750 | 92    |
| Spirafolide                                                                            | C <sub>15</sub> H <sub>18</sub> O <sub>3</sub> | FSTP   | 72.90       | 2.46         | 701 | 78    |
| 7-Methyl-3-methylidene-6-(3-oxobutyl)-4,7,8,8a-tetrahydro-3aH-cyclohepta[b]furan-2-one | C <sub>15</sub> H <sub>20</sub> O <sub>3</sub> | FSTP   | 73.30       | 5.97         | 755 | 91    |
| Hydroxymurolene                                                                        | C <sub>15</sub> H <sub>24</sub> O              | FSTP   | 73.60       | 6.33         | 649 | 81    |
| Cedrandiol                                                                             | C <sub>15</sub> H <sub>26</sub> O <sub>2</sub> | FSTP   | 73.90       | 1.41         | 545 | 21    |
| α-cedrene                                                                              | C <sub>15</sub> H <sub>24</sub>                | STP    | 74.00       | 2.04         | 698 | 82    |
| 4,7-Methanofuro[3,2-c]oxacycloundecin-6(4H)-one, 7,8,9,12-tetrahydro-3,11-dimethyl-    | C <sub>15</sub> H <sub>18</sub> O <sub>3</sub> | FSTP   | 74.00       | 3.09         | 717 | 72    |
| Graveolide                                                                             | C <sub>15</sub> H <sub>20</sub> O <sub>3</sub> | FSTP   | 77.30       | 2.12         | 549 | 81    |
| 1-n-Pentyladamantane                                                                   | C <sub>15</sub> H <sub>26</sub>                | STP    | 78.70       | 2.86         | 741 | 94    |
| Ivalin                                                                                 | C <sub>15</sub> H <sub>20</sub> O <sub>4</sub> | FSTP   | 79.20       | 1.61         | 552 | 51    |
| Costunolide                                                                            | C <sub>15</sub> H <sub>20</sub> O <sub>2</sub> | FSTP   | 79.40       | 1.77         | 752 | 45    |
| Achalensolide                                                                          | C <sub>15</sub> H <sub>18</sub> O <sub>3</sub> | FSTP   | 80.40       | 2.74         | 580 | 72    |
| T-2 Tetraol                                                                            | C <sub>15</sub> H <sub>22</sub> O <sub>6</sub> | FSTP   | 80.70       | 1.31         | 836 | 32    |
| Gazaniolide                                                                            | C <sub>15</sub> H <sub>18</sub> O <sub>2</sub> | FSTP   | 80.80       | 5.65         | 565 | 36    |
| Cyperanic acid                                                                         | C <sub>15</sub> H <sub>22</sub> O <sub>4</sub> | FSTP   | 80.90       | 3.39         | 629 | 95    |
| Pallensin                                                                              | C <sub>15</sub> H <sub>20</sub> O <sub>4</sub> | FSTP   | 82.10       | 2.52         | 544 | 40    |
| Caryophyllene oxide                                                                    | C <sub>15</sub> H <sub>24</sub> O              | FSTP   | 82.40       | 3.65         | 717 | 36    |

Supplementary Table 2. (Cont.)

| Compound Name                                                                                 | Mol. formula                                   | Class. | RT I (min.) | RT II (sec.) | MF  | P (%) |
|-----------------------------------------------------------------------------------------------|------------------------------------------------|--------|-------------|--------------|-----|-------|
| δ-Elemene                                                                                     | C <sub>15</sub> H <sub>24</sub>                | STP    | 82.80       | 4.01         | 561 | 96    |
| 6-Hydroxy-5a,9-dimethyl-3-methylidene-4,5,6,7,9a,9b-hexahydro-3aH-benzo[g][1]benzofuran-2-one | C <sub>15</sub> H <sub>20</sub> O <sub>3</sub> | FSTP   | 82.90       | 3.17         | 887 | 25    |
| Achillin                                                                                      | C <sub>15</sub> H <sub>18</sub> O <sub>3</sub> | FSTP   | 86.90       | 3.89         | 929 | 51    |
| Achillicin                                                                                    | C <sub>15</sub> H <sub>18</sub> O <sub>3</sub> | FSTP   | 86.90       | 4.11         | 729 | 32    |
| 5-[2-(Benzyloxy)ethyl]cyclohex-2-en-1-one                                                     | C <sub>15</sub> H <sub>18</sub> O <sub>2</sub> | FSTP   | 87.40       | 4.03         | 831 | 95    |
| Pentadecanal                                                                                  | C <sub>15</sub> H <sub>30</sub> O              | FSTP   | 87.60       | 3.17         | 772 | 97    |
| 3,7,7-Trimethyl-8-(2-methyl-propenyl)-bicyclo[4.2.0]oct-2-ene                                 | C <sub>15</sub> H <sub>24</sub>                | STP    | 88.90       | 5.12         | 615 | 66    |
| sesquithujene                                                                                 | C <sub>15</sub> H <sub>24</sub>                | STP    | 91.80       | 3.67         | 541 | 71    |
| 2-Ethyl-5-methyl-2-phenyl-4-hexen-1-ol                                                        | C <sub>15</sub> H <sub>22</sub> O              | FSTP   | 92.40       | 1.71         | 538 | 91    |
| 1-(2-Methylenecyclohexyl)-1-phenylethanol                                                     | C <sub>15</sub> H <sub>20</sub> O              | FSTP   | 95.00       | 3.39         | 587 | 78    |
| 1-Cyclohexylnonene                                                                            | C <sub>15</sub> H <sub>28</sub>                | STP    | 95.10       | 3.27         | 580 | 40    |
| 1,4-Dimethyl 2-[(3,4-dimethoxyphenyl)methyl]butanedioate                                      | C <sub>15</sub> H <sub>20</sub> O <sub>6</sub> | FSTP   | 100.80      | 5.93         | 578 | 27    |
| 3-Pentadecanone                                                                               | C <sub>15</sub> H <sub>30</sub> O              | FSTP   | 101.10      | 3.37         | 572 | 97    |
| 1-Methylene-2b-hydroxymethyl-3,3-dimethyl-4b-(3-methylbut-2-enyl)-cyclohexane                 | C <sub>15</sub> H <sub>26</sub> O              | FSTP   | 102.50      | 4.03         | 784 | 81    |
| 2,6,10-Dodecatrien-1-ol, 3,7,11-trimethyl-, (Z,E)-                                            | C <sub>15</sub> H <sub>26</sub> O              | FSTP   | 102.60      | 3.99         | 769 | 52    |
| 2,6,10-Dodecatrien-1-ol, 3,7,11-trimethyl-                                                    | C <sub>15</sub> H <sub>26</sub> O              | FSTP   | 102.60      | 3.85         | 608 | 52    |
| Ylangenol                                                                                     | C <sub>15</sub> H <sub>24</sub> O              | FSTP   | 103.10      | 1.15         | 541 | 96    |
| 2-Pentadecanone                                                                               | C <sub>15</sub> H <sub>30</sub> O              | FSTP   | 104.60      | 3.49         | 441 | 26    |
| 1-Formyl-2,2,6-trimethyl-3-cis-(3-methylbut-2-enyl)-5-cyclohexene                             | C <sub>15</sub> H <sub>24</sub> O              | FSTP   | 107.30      | 4.74         | 582 | 60    |
| 1,7-Dimethyl-4-(1-methylethyl)cyclodecane                                                     | C <sub>15</sub> H <sub>30</sub>                | STP    | 108.90      | 3.11         | 530 | 43    |
| 7-Oxabicyclo[4.1.0]heptane, 1-(1,3-dimethyl-1,3-butadienyl)-2,2,6-trimethyl-, (E)-            | C <sub>15</sub> H <sub>24</sub> O              | FSTP   | 110.50      | 0.93         | 574 | 97    |
| 1H-Indene, 2,3,3a,4,7,7a-hexahydro-2,2,4,4,7,7-hexamethyl-                                    | C <sub>15</sub> H <sub>26</sub>                | STP    | 113.40      | 2.02         | 597 | 32    |
| 5,7-Decadien-3-yne, 2,9-dihydroxy-5-(1-hydroxy-1-methylethyl)-2,9-dimethyl-, (Z,E)-           | C <sub>15</sub> H <sub>24</sub> O <sub>3</sub> | FSTP   | 114.60      | 1.51         | 545 | 67    |
| Guaiadiene                                                                                    | C <sub>15</sub> H <sub>24</sub>                | STP    | 118.10      | 1.17         | 607 | 96    |
| Anisole                                                                                       | C <sub>15</sub> H <sub>24</sub> O              | FSTP   | 120.90      | 4.64         | 667 | 72    |



**Supplementary Table 3.** Sesquiterpenoids identified across agarwood distillates (Oudh) samples using GCxGC-TOF/MS.

| Compound Name                                                                                      | Mol. formula                                   | Clas. | RT I (min) | RT II (sec) | MF  | P (%) |
|----------------------------------------------------------------------------------------------------|------------------------------------------------|-------|------------|-------------|-----|-------|
| Aureonitol                                                                                         | C <sub>15</sub> H <sub>20</sub> O <sub>3</sub> | FSTP  | 33.50      | 3.51        | 787 | 60    |
| 1,2-Dihydrothujopsene-(11)                                                                         | C <sub>15</sub> H <sub>26</sub>                | STP   | 34.30      | 4.03        | 889 | 63    |
| (8R,8aS)-8,8a-Dimethyl-2-(propan-2-ylidene)-1,2,3,7,8,8a-hexahydronaphthalene                      | C <sub>15</sub> H <sub>22</sub>                | STP   | 36.60      | 2.78        | 832 | 95    |
| Germacrene D                                                                                       | C <sub>15</sub> H <sub>24</sub>                | STP   | 36.60      | 2.44        | 432 | 92    |
| Copaene                                                                                            | C <sub>15</sub> H <sub>24</sub>                | STP   | 36.70      | 2.46        | 799 | 56    |
| α-Bergamotene                                                                                      | C <sub>15</sub> H <sub>24</sub>                | STP   | 37.30      | 2.54        | 933 | 81    |
| 4b,5,6,7,8,8a,9,10-Octahydro-1-methylphenanthrene                                                  | C <sub>15</sub> H <sub>20</sub>                | FSTP  | 37.90      | 3.25        | 471 | 79    |
| (R)-1-Methyl-4-(6-methylhept-5-en-2-yl)cyclohexa-1,4-diene                                         | C <sub>15</sub> H <sub>24</sub>                | STP   | 38.00      | 3.09        | 662 | 71    |
| isolekene                                                                                          | C <sub>15</sub> H <sub>24</sub>                | STP   | 38.70      | 2.56        | 916 | 65    |
| 1H-Cycloprop[e]azulene, 1a,2,3,4,4a,5,6,7b-octahydro-1,1,4,7-tetramethyl-, [1aR-(1aα,4a,4aβ,7bα)]- | C <sub>15</sub> H <sub>24</sub>                | STP   | 38.70      | 2.58        | 944 | 69    |
| 1H-Cyclopropa[a]naphthalene, decahydro-1,1,3a-trimethyl-7-methylene-, [1aS-(1aα,3aα,7aβ,7bα)]-     | C <sub>15</sub> H <sub>24</sub>                | STP   | 38.80      | 3.13        | 695 | 54    |
| Cyperene                                                                                           | C <sub>15</sub> H <sub>24</sub>                | STP   | 38.80      | 2.68        | 738 | 68    |
| Bicyclo[5.3.0]decane, 2-methylene-5-(1-methylvinyl)-8-methyl-                                      | C <sub>15</sub> H <sub>24</sub>                | STP   | 39.00      | 2.64        | 712 | 64    |
| α-Bergamotene                                                                                      | C <sub>15</sub> H <sub>24</sub>                | STP   | 39.00      | 2.76        | 736 | 41    |
| Cubenene                                                                                           | C <sub>15</sub> H <sub>24</sub>                | STP   | 39.20      | 2.74        | 889 | 36    |
| 1H-3a,7-Methanoazulene, 2,3,4,7,8,8a-hexahydro-3,6,8,8-tetramethyl-, [3R-(3a,3aβ,7β,8aα)]-         | C <sub>15</sub> H <sub>24</sub>                | STP   | 39.30      | 2.78        | 588 | 81    |
| Caryophyllene                                                                                      | C <sub>15</sub> H <sub>24</sub>                | STP   | 39.40      | 2.72        | 947 | 83    |
| 6-Methyl-2-(4-methylcyclohex-3-en-1-yl)hepta-1,5-dien-4-ol                                         | C <sub>15</sub> H <sub>24</sub> O              | FSTP  | 39.60      | 2.94        | 655 | 24    |
| 3-methyl-5-(2,6-dimethylheptyl)-1,5-Pent-2-enolide                                                 | C <sub>15</sub> H <sub>26</sub> O <sub>2</sub> | FSTP  | 39.60      | 3.97        | 734 | 19    |
| Bicyclo[4.1.0]-3-heptene, 2-isopropenyl-5-isopropyl-7,7-dimethyl-                                  | C <sub>15</sub> H <sub>24</sub>                | STP   | 39.60      | 2.82        | 915 | 56    |
| 1,3,7,11-Cyclotetradecatetraene, 2-methyl-                                                         | C <sub>15</sub> H <sub>22</sub>                | STP   | 39.80      | 3.13        | 733 | 62    |
| γ-Elemene                                                                                          | C <sub>15</sub> H <sub>24</sub>                | STP   | 40.10      | 3.55        | 790 | 48    |
| β-Calarene                                                                                         | C <sub>15</sub> H <sub>24</sub>                | STP   | 40.20      | 2.80        | 769 | 62    |
| 4a,5-Dimethyl-3-(prop-1-en-2-yl)-1,2,3,4,4a,5,6,7-octahydronaphthalen-1-ol                         | C <sub>15</sub> H <sub>24</sub> O              | FSTP  | 40.30      | 3.15        | 640 | 28    |
| α-Guaiene                                                                                          | C <sub>15</sub> H <sub>24</sub>                | STP   | 40.60      | 2.62        | 604 | 41    |
| 2-Pentadecen-4-yne, (Z)-                                                                           | C <sub>15</sub> H <sub>26</sub>                | STP   | 40.60      | 4.23        | 862 | 98    |
| 6,10-Dodecadien-1-yn-3-ol, 3,7,11-trimethyl-                                                       | C <sub>15</sub> H <sub>24</sub> O              | FSTP  | 40.80      | 3.15        | 841 | 41    |
| Caryophyllenyl alcohol                                                                             | C <sub>15</sub> H <sub>26</sub> O              | FSTP  | 41.00      | 3.67        | 754 | 72    |

Supplementary Table 3. (Cont.)

| Compound Name                                                                                                                                                      | Mol. formula                      | Clas. | RT I (min) | RT II (sec) | MF  | P (%) |
|--------------------------------------------------------------------------------------------------------------------------------------------------------------------|-----------------------------------|-------|------------|-------------|-----|-------|
| Cycloisolongifolene                                                                                                                                                | C <sub>15</sub> H <sub>24</sub>   | STP   | 41.30      | 3.04        | 846 | 41    |
| Humulene                                                                                                                                                           | C <sub>15</sub> H <sub>24</sub>   | STP   | 41.40      | 2.88        | 588 | 44    |
| 6,10-Dodecadien-3-ol, 3,7,11-trimethyl-                                                                                                                            | C <sub>15</sub> H <sub>28</sub>   | FSTP  | 41.50      | 2.32        | 666 | 29    |
| 1,5-Cyclodecadiene, 1,5-dimethyl-8-(1-methylethenyl)-, [S-(Z,E)]-                                                                                                  | C <sub>15</sub> H <sub>24</sub>   | STP   | 41.50      | 3.08        | 719 | 49    |
| 1R,3Z,9S-4,11,11-Trimethyl-8-methylenebicyclo[7.2.0]undec-3-ene                                                                                                    | C <sub>15</sub> H <sub>24</sub>   | STP   | 41.50      | 2.84        | 630 | 50    |
| Prezizaene                                                                                                                                                         | C <sub>15</sub> H <sub>24</sub>   | STP   | 41.60      | 3.11        | 787 | 24    |
| 1H-3a,7-Methanoazulene, octahydro-1,4,9,9-tetramethyl-, (1 $\alpha$ ,3 $\alpha$ ,4 $\beta$ ,7 $\alpha$ ,8 $\alpha\beta$ )-                                         | C <sub>15</sub> H <sub>26</sub>   | STP   | 41.80      | 2.70        | 248 | 95    |
| Rotundene                                                                                                                                                          | C <sub>15</sub> H <sub>24</sub>   | STP   | 41.90      | 3.04        | 841 | 43    |
| Alloaromadendrene                                                                                                                                                  | C <sub>15</sub> H <sub>24</sub>   | STP   | 41.90      | 2.90        | 764 | 31    |
| Aromandendrene                                                                                                                                                     | C <sub>15</sub> H <sub>24</sub>   | STP   | 41.90      | 2.88        | 679 | 49    |
| $\beta$ -Caryophyllene                                                                                                                                             | C <sub>15</sub> H <sub>24</sub>   | STP   | 42.00      | 2.98        | 828 | 33    |
| Sesquithujene                                                                                                                                                      | C <sub>15</sub> H <sub>24</sub>   | STP   | 42.10      | 2.94        | 637 | 67    |
| $\beta$ -Acoradiene                                                                                                                                                | C <sub>15</sub> H <sub>24</sub>   | STP   | 42.30      | 2.94        | 706 | 33    |
| (4R,4aS,6S)-4,4a-Dimethyl-6-(prop-1-en-2-yl)-1,2,3,4,4a,5,6,7-octahydronaphthalene                                                                                 | C <sub>15</sub> H <sub>24</sub>   | STP   | 42.40      | 2.90        | 828 | 52    |
| (R)-3-Methylene-6-((S)-1,2,2-trimethylcyclopentyl)cyclohex-1-ene                                                                                                   | C <sub>15</sub> H <sub>24</sub>   | STP   | 42.50      | 3.93        | 749 | 49    |
| $\gamma$ -Gurjunene                                                                                                                                                | C <sub>15</sub> H <sub>24</sub>   | STP   | 42.50      | 2.86        | 542 | 10    |
| 4a,8-Dimethyl-2-(prop-1-en-2-yl)-1,2,3,4,4a,5,6,7-octahydronaphthalene                                                                                             | C <sub>15</sub> H <sub>24</sub>   | STP   | 42.60      | 2.84        | 545 | 42    |
| Cedrene oxide                                                                                                                                                      | C <sub>15</sub> H <sub>24</sub> O | FSTP  | 42.70      | 3.57        | 661 | 33    |
| Spathulenol                                                                                                                                                        | C <sub>15</sub> H <sub>24</sub> O | FSTP  | 42.70      | 3.55        | 722 | 14    |
| $\beta$ -Acoradienol                                                                                                                                               | C <sub>15</sub> H <sub>24</sub> O | FSTP  | 42.70      | 3.19        | 616 | 27    |
| $\alpha$ -Eremophilane                                                                                                                                             | C <sub>15</sub> H <sub>28</sub>   | STP   | 42.80      | 2.62        | 762 | 60    |
| 1,2,4-Metheno-1H-indene, octahydro-1,7a-dimethyl-5-(1-methylethyl)-, [1S-(1 $\alpha$ ,2 $\alpha$ ,3 $\alpha\beta$ ,4 $\alpha$ ,5 $\alpha$ ,7 $\alpha\beta$ ,8S*)]- | C <sub>15</sub> H <sub>24</sub>   | STP   | 42.80      | 2.96        | 558 | 11    |
| Cedrenol                                                                                                                                                           | C <sub>15</sub> H <sub>24</sub> O | FSTP  | 42.80      | 3.00        | 837 | 84    |
| $\alpha$ -Amorphene                                                                                                                                                | C <sub>15</sub> H <sub>24</sub>   | STP   | 42.80      | 3.02        | 679 | 98    |
| Zizanene                                                                                                                                                           | C <sub>15</sub> H <sub>24</sub>   | STP   | 42.90      | 3.00        | 808 | 35    |
| Muroladiene                                                                                                                                                        | C <sub>15</sub> H <sub>24</sub>   | STP   | 43.10      | 3.93        | 714 | 48    |
| 1,4-Dimethyl-7-(prop-1-en-2-yl)decahydroazulen-4-ol                                                                                                                | C <sub>15</sub> H <sub>26</sub> O | FSTP  | 43.20      | 3.09        | 734 | 48    |
| Aristolochene                                                                                                                                                      | C <sub>15</sub> H <sub>24</sub>   | STP   | 43.20      | 3.02        | 833 | 65    |

Supplementary Table 3. (Cont.)

| Compound Name                                                                                | Mol. formula                                   | Clas. | RT I (min) | RT II (sec) | MF  | P (%) |
|----------------------------------------------------------------------------------------------|------------------------------------------------|-------|------------|-------------|-----|-------|
| Selinadiene                                                                                  | C <sub>15</sub> H <sub>24</sub>                | STP   | 43.20      | 3.06        | 805 | 66    |
| β-Selinene                                                                                   | C <sub>15</sub> H <sub>24</sub>                | STP   | 43.40      | 3.06        | 785 | 41    |
| Epoxycalamenene                                                                              | C <sub>15</sub> H <sub>20</sub> O              | FSTP  | 43.50      | 3.81        | 581 | 41    |
| β-Vetispirene                                                                                | C <sub>15</sub> H <sub>22</sub>                | STP   | 43.60      | 3.21        | 659 | 91    |
| β-Longipinene                                                                                | C <sub>15</sub> H <sub>24</sub>                | STP   | 43.70      | 3.08        | 731 | 42    |
| δ-Guaiene                                                                                    | C <sub>15</sub> H <sub>24</sub>                | STP   | 44.00      | 3.04        | 589 | 31    |
| Valencene                                                                                    | C <sub>15</sub> H <sub>24</sub>                | STP   | 44.00      | 2.92        | 811 | 21    |
| α-Farnesene                                                                                  | C <sub>15</sub> H <sub>24</sub>                | STP   | 44.00      | 3.65        | 690 | 81    |
| Murolane                                                                                     | C <sub>15</sub> H <sub>24</sub>                | STP   | 44.00      | 2.96        | 511 | 62    |
| Guaiadiene                                                                                   | C <sub>15</sub> H <sub>24</sub>                | STP   | 44.40      | 3.25        | 759 | 53    |
| Cuparene                                                                                     | C <sub>15</sub> H <sub>22</sub>                | STP   | 44.50      | 3.75        | 649 | 91    |
| α-Curcumene                                                                                  | C <sub>15</sub> H <sub>22</sub>                | STP   | 44.60      | 3.69        | 462 | 59    |
| 1,1,4,7-Tetramethyldecahydro-1H-cyclopropa[e]azulene-4,7-diol                                | C <sub>15</sub> H <sub>26</sub> O <sub>2</sub> | FSTP  | 44.70      | 3.31        | 752 | 69    |
| Humulenol-II                                                                                 | C <sub>15</sub> H <sub>24</sub> O              | FSTP  | 44.90      | 3.29        | 928 | 49    |
| Nootkatene                                                                                   | C <sub>15</sub> H <sub>22</sub>                | STP   | 45.10      | 3.23        | 769 | 21    |
| γ-Muurolene                                                                                  | C <sub>15</sub> H <sub>24</sub>                | STP   | 45.20      | 3.15        | 778 | 54    |
| 4aH-Cycloprop[e]azulen-4a-ol, decahydro-1,1,4,7-tetramethyl-, [1aR-(1aα,4β,4aβ,7α,7aβ,7ba)]- | C <sub>15</sub> H <sub>26</sub> O              | FSTP  | 45.20      | 2.96        | 687 | 44    |
| Carotol                                                                                      | C <sub>15</sub> H <sub>26</sub> O              | FSTP  | 45.20      | 3.11        | 563 | 41    |
| Caparratriene                                                                                | C <sub>15</sub> H <sub>26</sub>                | STP   | 45.30      | 4.38        | 770 | 61    |
| α-Panasinsen                                                                                 | C <sub>15</sub> H <sub>24</sub>                | STP   | 45.30      | 3.11        | 791 | 24    |
| β-Cadinene                                                                                   | C <sub>15</sub> H <sub>24</sub>                | STP   | 45.40      | 3.15        | 676 | 22    |
| 1-Isopropyl-4,7-dimethyl-1,2,3,5,6,8a-hexahydronaphthalene                                   | C <sub>15</sub> H <sub>24</sub>                | STP   | 45.40      | 3.06        | 607 | 95    |
| Calamenene                                                                                   | C <sub>15</sub> H <sub>22</sub>                | STP   | 45.50      | 3.47        | 634 | 12    |
| 1-Isopropyl-4,7-dimethyl-1,2,3,5,6,8a-hexahydronaphthalene                                   | C <sub>15</sub> H <sub>24</sub>                | STP   | 45.60      | 3.13        | 738 | 19    |
| α-Muurolene                                                                                  | C <sub>15</sub> H <sub>24</sub> O              | FSTP  | 45.60      | 3.63        | 745 | 52    |
| γ-Vetivenene                                                                                 | C <sub>15</sub> H <sub>22</sub>                | STP   | 45.70      | 3.37        | 530 | 10    |
| Kessane                                                                                      | C <sub>15</sub> H <sub>26</sub> O              | FSTP  | 45.80      | 3.29        | 652 | 12    |
| Cyperene epoxide                                                                             | C <sub>15</sub> H <sub>24</sub> O              | FSTP  | 46.10      | 3.75        | 614 | 15    |

Supplementary Table 3. (Cont.)

| Compound Name                                                                                                                            | Mol. formula                                   | Clas. | RT I (min) | RT II (sec) | MF  | P (%) |
|------------------------------------------------------------------------------------------------------------------------------------------|------------------------------------------------|-------|------------|-------------|-----|-------|
| $\alpha$ -Cadinene                                                                                                                       | C <sub>15</sub> H <sub>24</sub>                | STP   | 46.20      | 3.06        | 705 | 17    |
| (4aR,8aS)-4a-Methyl-1-methylene-7-(propan-2-ylidene)decahydronaphthalene                                                                 | C <sub>15</sub> H <sub>24</sub>                | STP   | 46.30      | 3.21        | 621 | 26    |
| Himachalene                                                                                                                              | C <sub>15</sub> H <sub>22</sub>                | STP   | 46.30      | 3.65        | 586 | 18    |
| 4-Isopropyl-6-methyl-1-methylene-1,2,3,4-tetrahydronaphthalene                                                                           | C <sub>15</sub> H <sub>20</sub>                | FSTP  | 46.60      | 3.75        | 611 | 31    |
| $\alpha$ -Calacorene                                                                                                                     | C <sub>15</sub> H <sub>20</sub>                | FSTP  | 46.60      | 3.89        | 780 | 62    |
| Cyclopentadecadiyne                                                                                                                      | C <sub>15</sub> H <sub>22</sub>                | STP   | 46.80      | 5.65        | 754 | 36    |
| Selina-3,7(11)-diene                                                                                                                     | C <sub>15</sub> H <sub>24</sub>                | STP   | 46.80      | 3.19        | 743 | 35    |
| Longiverbenone                                                                                                                           | C <sub>15</sub> H <sub>22</sub> O              | FSTP  | 46.90      | 3.85        | 725 | 15    |
| 2-(4a,8-Dimethyl-1,2,3,4,4a,5,6,7-octahydro-naphthalen-2-yl)-prop-2-en-1-ol                                                              | C <sub>15</sub> H <sub>24</sub> O              | FSTP  | 47.00      | 3.87        | 795 | 53    |
| $\alpha$ -Agarofuran                                                                                                                     | C <sub>15</sub> H <sub>24</sub> O              | FSTP  | 47.00      | 3.93        | 591 | 27    |
| $\alpha$ -Calacorene                                                                                                                     | C <sub>15</sub> H <sub>20</sub>                | FSTP  | 47.00      | 4.07        | 720 | 18    |
| (3aS,8aS)-6,8a-Dimethyl-3-(propan-2-ylidene)-1,2,3,3a,4,5,8,8a-octahydroazulene                                                          | C <sub>15</sub> H <sub>24</sub>                | STP   | 47.10      | 4.29        | 601 | 20    |
| Coronene                                                                                                                                 | C <sub>15</sub> H <sub>20</sub>                | FSTP  | 47.30      | 3.75        | 793 | 77    |
| Nerolidol                                                                                                                                | C <sub>15</sub> H <sub>26</sub> O              | FSTP  | 47.40      | 3.08        | 724 | 43    |
| 1,6,10-Dodecatrien-3-ol, 3,7,11-trimethyl-, (E)-                                                                                         | C <sub>15</sub> H <sub>26</sub> O              | FSTP  | 47.40      | 3.00        | 666 | 14    |
| Hydroxycaryophyllene                                                                                                                     | C <sub>15</sub> H <sub>24</sub> O              | FSTP  | 47.70      | 3.59        | 702 | 13    |
| $\alpha$ -Vetivone                                                                                                                       | C <sub>15</sub> H <sub>22</sub> O              | FSTP  | 47.70      | 3.63        | 779 | 37    |
| Bicyclo[4.4.0]dec-2-ene-4-ol, 2-methyl-9-(prop-1-en-3-ol-2-yl)-                                                                          | C <sub>15</sub> H <sub>24</sub> O <sub>2</sub> | FSTP  | 47.80      | 3.65        | 729 | 18    |
| Bicyclo[4.4.0]dec-5-ene, 1,5-dimethyl-3-hydroxy-8-(1-methylene-2-hydroxyethyl-1)-                                                        | C <sub>15</sub> H <sub>24</sub> O <sub>2</sub> | FSTP  | 47.80      | 3.79        | 817 | 69    |
| 4(15)-Selinene-11,12-diol                                                                                                                | C <sub>15</sub> H <sub>26</sub> O <sub>2</sub> | FSTP  | 48.00      | 4.76        | 684 | 18    |
| 1H-Cycloprop[e]azulene, decahydro-1,1,4,7-tetramethyl-, [1aR-(1a $\alpha$ ,4 $\beta$ ,4a $\beta$ ,7 $\beta$ ,7a $\beta$ ,7b $\alpha$ )]- | C <sub>15</sub> H <sub>26</sub>                | STP   | 48.10      | 4.40        | 702 | 14    |
| 2H-3,9a-Methano-1-benzoxepin, octahydro-2,2,5a,9-tetramethyl-, [3R-(3 $\alpha$ ,5 $\alpha\alpha$ ,9 $\alpha$ ,9 $\alpha\alpha$ )]-       | C <sub>15</sub> H <sub>26</sub> O              | FSTP  | 48.30      | 4.80        | 652 | 12    |
| 4aH-cycloprop[e]azulen-4a-ol, decahydro-1,1,4,7-tetramethyl-                                                                             | C <sub>15</sub> H <sub>26</sub> O              | FSTP  | 48.30      | 3.69        | 722 | 28    |
| (S,1Z,6Z)-8-Isopropyl-1-methyl-5-methylenecyclodeca-1,6-diene                                                                            | C <sub>15</sub> H <sub>24</sub>                | STP   | 48.40      | 4.31        | 758 | 66    |
| 2-(4a,8-Dimethyl-2,3,4,4a,5,6-hexahydro-naphthalen-2-yl)-prop-2-en-1-ol                                                                  | C <sub>15</sub> H <sub>22</sub> O              | FSTP  | 48.40      | 3.89        | 748 | 16    |
| Isolongifolene                                                                                                                           | C <sub>15</sub> H <sub>20</sub>                | FSTP  | 48.40      | 3.87        | 729 | 26    |
| 1H-3a,7-Methanoazulene, octahydro-1,4,9,9-tetramethyl-                                                                                   | C <sub>15</sub> H <sub>26</sub>                | STP   | 48.60      | 4.48        | 750 | 26    |
| 2-((2R,4aR)-4a,8-Dimethyl-1,2,3,4,4a,5,6,7-octahydronaphthalen-2-yl)prop-2-en-1-ol                                                       | C <sub>15</sub> H <sub>24</sub> O              | FSTP  | 48.90      | 3.93        | 759 | 14    |

Supplementary Table 3. (Cont.)

| Compound Name                                                                                                                                             | Mol. formula                                   | Clas. | RT I (min) | RT II (sec) | MF  | P (%) |
|-----------------------------------------------------------------------------------------------------------------------------------------------------------|------------------------------------------------|-------|------------|-------------|-----|-------|
| 1,4-Dihydrothujopsene-(I1)                                                                                                                                | C <sub>15</sub> H <sub>26</sub>                | STP   | 49.00      | 0.46        | 861 | 28    |
| Humulene epoxide I                                                                                                                                        | C <sub>15</sub> H <sub>24</sub> O              | FSTP  | 49.00      | 0.34        | 799 | 28    |
| Humulene oxide II                                                                                                                                         | C <sub>15</sub> H <sub>24</sub> O              | FSTP  | 49.40      | 0.50        | 682 | 36    |
| 5-Azulenemethanol, 1,2,3,4,5,6,7,8-octahydro- $\alpha,\alpha,3,8$ -tetramethyl-                                                                           | C <sub>15</sub> H <sub>26</sub> O              | FSTP  | 49.70      | 3.57        | 824 | 16    |
| 2-((2R,4aR,8aR)-4a,8-Dimethyl-1,2,3,4,4a,5,6,8a-octahydronaphthalen-2-yl)prop-2-en-1-ol                                                                   | C <sub>15</sub> H <sub>24</sub> O              | FSTP  | 49.70      | 3.93        | 785 | 31    |
| 1,4-Methanoazulen-9-ol, decahydro-1,5,5,8a-tetramethyl-, [1R-(1 $\alpha$ ..                                                                               | C <sub>15</sub> H <sub>26</sub> O              | FSTP  | 49.90      | 3.91        | 552 | 34    |
| Isoaromadendrene epoxide                                                                                                                                  | C <sub>15</sub> H <sub>24</sub> O              | FSTP  | 50.00      | 3.79        | 794 | 24    |
| (R)-3,5,8a-Trimethyl-7,8,8a,9-tetrahydronaphtho[2,3-b]furan-4(6H)-one                                                                                     | C <sub>15</sub> H <sub>18</sub> O <sub>2</sub> | FSTP  | 50.10      | 4.72        | 720 | 13    |
| $\alpha$ -Isocomene                                                                                                                                       | C <sub>15</sub> H <sub>24</sub>                | STP   | 50.10      | 4.42        | 769 | 17    |
| $\alpha$ -cyperone                                                                                                                                        | C <sub>15</sub> H <sub>20</sub> O              | FSTP  | 50.60      | 4.60        | 873 | 43    |
| 4a(2H)-Naphthalenol, 1,3,4,5,6,8a-hexahydro-4,7-dimethyl-1-(1-methylethyl)-, (1S,4R,4aS,8aR)-                                                             | C <sub>15</sub> H <sub>26</sub> O              | FSTP  | 50.70      | 3.63        | 783 | 35    |
| 2H-2,4a-Ethanonaphthalen-8(5H)-one, hexahydro-2,5,5-trimethyl-                                                                                            | C <sub>15</sub> H <sub>24</sub> O              | FSTP  | 50.70      | 4.27        | 517 | 21    |
| Neointermedeol                                                                                                                                            | C <sub>15</sub> H <sub>26</sub> O              | FSTP  | 50.70      | 3.75        | 612 | 65    |
| 1H-Benzocyclohepten-7-ol, 2,3,4,4a,5,6,7,8-octahydro-1,1,4a,7-tetramethyl-, cis-                                                                          | C <sub>15</sub> H <sub>26</sub> O              | FSTP  | 50.80      | 3.53        | 562 | 18    |
| Cyperen-8-one                                                                                                                                             | C <sub>15</sub> H <sub>22</sub> O              | FSTP  | 50.90      | 4.34        | 803 | 12    |
| Maaliol                                                                                                                                                   | C <sub>15</sub> H <sub>26</sub> O              | FSTP  | 50.90      | 3.73        | 618 | 27    |
| Junenol                                                                                                                                                   | C <sub>15</sub> H <sub>26</sub> O              | FSTP  | 51.10      | 3.85        | 872 | 58    |
| $\beta$ -Guaiene                                                                                                                                          | C <sub>15</sub> H <sub>24</sub>                | STP   | 51.10      | 4.15        | 657 | 69    |
| 1,3a-Ethano-3aH-indene, 1,2,3,6,7,7a-hexahydro-2,2,4,7a-tetramethyl-, [1R-(1 $\alpha$ ,3 $\alpha\alpha$ ,7 $\alpha\alpha$ )]-                             | C <sub>15</sub> H <sub>24</sub>                | STP   | 51.30      | 5.46        | 615 | 48    |
| 2H-Cyclopropa[a]naphthalen-2-one, 1,1a,4,5,6,7,7a,7b-octahydro-1,1,7,7a-tetramethyl-, (1 $\alpha\alpha$ ,7 $\alpha$ ,7 $\alpha\alpha$ ,7 $\beta\alpha$ )- | C <sub>15</sub> H <sub>22</sub> O              | FSTP  | 51.30      | 4.68        | 757 | 16    |
| $\beta$ -Acorenol                                                                                                                                         | C <sub>15</sub> H <sub>26</sub> O              | FSTP  | 51.50      | 0.36        | 795 | 23    |
| 2-(4a,8-Dimethyl-2,3,4,5,6,7-hexahydro-1H-naphthalen-2-yl)propan-2-ol                                                                                     | C <sub>15</sub> H <sub>26</sub> O              | FSTP  | 51.80      | 3.93        | 840 | 83    |
| 2-(4a,8-Dimethyl-2,3,4,5,6,7-hexahydro-1H-naphthalen-2-yl)propan-2-ol                                                                                     | C <sub>15</sub> H <sub>26</sub> O              | FSTP  | 51.80      | 3.93        | 840 | 83    |
| Aristolene                                                                                                                                                | C <sub>15</sub> H <sub>24</sub>                | STP   | 51.80      | 5.22        | 770 | 53    |
| Curcumenol                                                                                                                                                | C <sub>15</sub> H <sub>22</sub> O <sub>2</sub> | FSTP  | 51.90      | 4.74        | 625 | 34    |
| Zonarene                                                                                                                                                  | C <sub>15</sub> H <sub>24</sub>                | STP   | 52.00      | 4.40        | 569 | 44    |
| Agarospinol                                                                                                                                               | C <sub>15</sub> H <sub>26</sub> O              | FSTP  | 52.00      | 3.93        | 821 | 52    |
| 4,7-Methanoazulene, 1,2,3,4,5,6,7,8-octahydro-1,4,9,9-tetramethyl-, [1S-(1 $\alpha$ ,4 $\alpha$ ,7 $\alpha$ )]-                                           | C <sub>15</sub> H <sub>24</sub>                | STP   | 52.00      | 4.50        | 823 | 59    |

**Supplementary Table 3. (Cont.)**

| Compound Name                                                                                                                        | Mol. formula                                   | Clas. | RT I (min) | RT II (sec) | MF  | P (%) |
|--------------------------------------------------------------------------------------------------------------------------------------|------------------------------------------------|-------|------------|-------------|-----|-------|
| 1-Naphthalenol, 1,2,3,4,4a,7,8,8a-octahydro-1,6-dimethyl-4-(1-methylethyl)-, [1R-(1 $\alpha$ ,4 $\beta$ ,4a $\beta$ ,8a $\beta$ )]-  | C <sub>15</sub> H <sub>26</sub> O              | FSTP  | 52.10      | 3.77        | 831 | 38    |
| $\gamma$ -Gurjunenepoxide-(2)                                                                                                        | C <sub>15</sub> H <sub>24</sub> O              | FSTP  | 52.40      | 3.95        | 764 | 38    |
| Rosifoliol                                                                                                                           | C <sub>15</sub> H <sub>26</sub> O              | FSTP  | 52.50      | 3.99        | 604 | 45    |
| Ambrosin                                                                                                                             | C <sub>15</sub> H <sub>18</sub> O <sub>3</sub> | FSTP  | 52.60      | 4.54        | 548 | 82    |
| $\beta$ -Cyclocostunolide                                                                                                            | C <sub>15</sub> H <sub>20</sub> O <sub>2</sub> | FSTP  | 52.70      | 4.50        | 788 | 40    |
| 4a,trans-8a-Perhydro-cis-2-(2-hydroxy-2-propyl)-4a,cis-8-dimethylnaphthalene                                                         | C <sub>15</sub> H <sub>28</sub>                | FSTP  | 52.80      | 3.75        | 807 | 34    |
| $\beta$ -Eudesmol                                                                                                                    | C <sub>15</sub> H <sub>24</sub> O              | FSTP  | 52.80      | 4.19        | 674 | 32    |
| 2-Naphthalenemethanol, decahydro- $\alpha$ , $\alpha$ ,4a-trimethyl-8-methylene-, [2R-(2 $\alpha$ ,4a $\alpha$ ,8a $\beta$ )]-       | C <sub>15</sub> H <sub>26</sub> O              | FSTP  | 52.90      | 4.01        | 768 | 13    |
| Guaiol                                                                                                                               | C <sub>15</sub> H <sub>26</sub> O              | FSTP  | 52.90      | 4.07        | 788 | 52    |
| $\alpha$ -Eudesmol                                                                                                                   | C <sub>15</sub> H <sub>26</sub> O              | FSTP  | 53.00      | 4.27        | 592 | 47    |
| Cubenol                                                                                                                              | C <sub>15</sub> H <sub>26</sub> O              | FSTP  | 53.00      | 4.11        | 590 | 37    |
| Viridiflorol                                                                                                                         | C <sub>15</sub> H <sub>26</sub> O              | FSTP  | 53.10      | 3.95        | 798 | 16    |
| Hedycaryol                                                                                                                           | C <sub>15</sub> H <sub>26</sub> O              | FSTP  | 53.10      | 3.95        | 808 | 30    |
| 2-Furanmethanol, tetrahydro- $\alpha$ , $\alpha$ ,5-trimethyl-5-(4-methyl-3-cyclohexen-1-yl)-, [2S-[2 $\alpha$ ,5 $\beta$ (R*)]]-    | C <sub>15</sub> H <sub>26</sub> O <sub>2</sub> | FSTP  | 53.20      | 3.55        | 709 | 19    |
| Globulol                                                                                                                             | C <sub>15</sub> H <sub>26</sub> O              | FSTP  | 53.30      | 4.56        | 807 | 23    |
| Longipinene epoxide                                                                                                                  | C <sub>15</sub> H <sub>24</sub> O              | FSTP  | 53.40      | 2.22        | 728 | 37    |
| $\delta$ -Neoclovene                                                                                                                 | C <sub>15</sub> H <sub>26</sub>                | STP   | 53.40      | 4.31        | 675 | 17    |
| 4-[(E)-5-Hydroxy-3-methylpent-3-enyl]-3,5,5-trimethylcyclohex-2-en-1-one                                                             | C <sub>15</sub> H <sub>24</sub> O <sub>2</sub> | FSTP  | 53.40      | 0.60        | 808 | 24    |
| Khusiol                                                                                                                              | C <sub>15</sub> H <sub>26</sub> O              | FSTP  | 53.50      | 4.38        | 742 | 14    |
| Patchouli alcohol                                                                                                                    | C <sub>15</sub> H <sub>26</sub> O              | FSTP  | 53.50      | 4.38        | 746 | 17    |
| 5-Azulenemethanol, 1,2,3,3a,4,5,6,7-octahydro- $\alpha$ , $\alpha$ ,3,8-tetramethyl-, [3S-(3 $\alpha$ ,3a $\beta$ ,5 $\alpha$ )]-    | C <sub>15</sub> H <sub>26</sub> O              | FSTP  | 53.60      | 3.99        | 663 | 63    |
| 2-Naphthalenemethanol, 1,2,3,4,4a,5,6,8a-octahydro- $\alpha$ , $\alpha$ ,4a,8-tetramethyl-, (2 $\alpha$ ,4a $\alpha$ ,8a $\alpha$ )- | C <sub>15</sub> H <sub>26</sub> O              | FSTP  | 53.60      | 3.87        | 670 | 74    |
| $\alpha$ -Bisabolene epoxide                                                                                                         | C <sub>15</sub> H <sub>24</sub> O              | FSTP  | 53.90      | 4.21        | 730 | 32    |
| (7a-Isopropenyl-4,5-dimethyloctahydroinden-4-yl)methanol                                                                             | C <sub>15</sub> H <sub>26</sub> O              | FSTP  | 54.00      | 3.73        | 796 | 78    |
| 3-Cyclohexen-1-ol, 1-(1,5-dimethyl-4-hexenyl)-4-methyl-                                                                              | C <sub>15</sub> H <sub>26</sub> O              | FSTP  | 54.00      | 3.55        | 832 | 32    |
| 1H-3a,7-Methanoazulene, octahydro-1,4,9,9-tetramethyl-, (1 $\alpha$ ,3a $\alpha$ ,4 $\beta$ ,7 $\alpha$ ,8a $\beta$ )-               | C <sub>15</sub> H <sub>26</sub>                | STP   | 54.00      | 3.71        | 597 | 16    |
| Guiaiazulene                                                                                                                         | C <sub>15</sub> H <sub>18</sub>                | STP   | 54.00      | 4.64        | 830 | 30    |
| 1H-Benzocycloheptene, 2,4a,5,6,7,8,9,9a-octahydro-3,5,5-trimethyl-9-methylene-, (4aS-cis)-                                           | C <sub>15</sub> H <sub>24</sub>                | STP   | 54.20      | 4.90        | 791 | 9     |

Supplementary Table 3. (Cont.)

| Compound Name                                                                                         | Mol. formula                                   | Clas. | RT I (min) | RT II (sec) | MF  | P (%) |
|-------------------------------------------------------------------------------------------------------|------------------------------------------------|-------|------------|-------------|-----|-------|
| Germacraol                                                                                            | C <sub>15</sub> H <sub>24</sub> O              | FSTP  | 54.20      | 4.44        | 783 | 11    |
| 2,6,10-Dodecatrien-1-ol, 3,7,11-trimethyl-                                                            | C <sub>15</sub> H <sub>26</sub> O              | FSTP  | 54.30      | 3.51        | 572 | 22    |
| Mustakone                                                                                             | C <sub>15</sub> H <sub>22</sub> O              | FSTP  | 54.40      | 4.58        | 785 | 14    |
| 1-(1,3-Dimethyl-buta-1,3-dienyl)-3,7,7-trimethyl-2-oxa-bicyclo[3.2.0]hept-3-ene                       | C <sub>15</sub> H <sub>22</sub> O              | FSTP  | 54.50      | 1.25        | 768 | 11    |
| α-Bisabolol                                                                                           | C <sub>15</sub> H <sub>26</sub> O              | FSTP  | 54.70      | 3.61        | 626 | 23    |
| Epizanonone                                                                                           | C <sub>15</sub> H <sub>22</sub> O              | FSTP  | 54.70      | 4.82        | 823 | 26    |
| Taylorione                                                                                            | C <sub>15</sub> H <sub>22</sub> O              | FSTP  | 54.90      | 4.84        | 819 | 33    |
| Longifolene                                                                                           | C <sub>15</sub> H <sub>24</sub>                | STP   | 55.00      | 5.00        | 816 | 30    |
| 1-Methylene-2b-hydroxymethyl-3,3-dimethyl-4b-(3-methylbut-2-enyl)-cyclohexane                         | C <sub>15</sub> H <sub>26</sub> O              | FSTP  | 55.00      | 3.39        | 649 | 17    |
| Alloaromadendrene oxide                                                                               | C <sub>15</sub> H <sub>24</sub> O              | FSTP  | 55.10      | 4.36        | 526 | 13    |
| Aromadendrene oxide-(1)                                                                               | C <sub>15</sub> H <sub>24</sub> O              | FSTP  | 55.30      | 4.27        | 705 | 28    |
| 3,5,11-Eudesmatriene                                                                                  | C <sub>15</sub> H <sub>22</sub>                | STP   | 55.30      | 5.20        | 809 | 16    |
| Cyperotundone                                                                                         | C <sub>15</sub> H <sub>22</sub> O              | FSTP  | 55.50      | 5.30        | 779 | 24    |
| 7-(1,3-Dimethylbuta-1,3-dienyl)-1,6,6-trimethyl-3,8-dioxatricyclo[5.1.0.0(2,4)]octane                 | C <sub>15</sub> H <sub>22</sub> O <sub>2</sub> | FSTP  | 55.60      | 5.10        | 738 | 21    |
| 1H-Cyclopropa[a]naphthalene, 1a,2,6,7,7a,7b-hexahydro-1,1,7,7a-tetramethyl-, [1aR-(1aα,7α,7aα,7bα)]-  | C <sub>15</sub> H <sub>22</sub>                | STP   | 55.60      | 5.46        | 779 | 21    |
| Eudesmatriene                                                                                         | C <sub>15</sub> H <sub>22</sub>                | STP   | 55.70      | 5.63        | 789 | 18    |
| 4-isopropyl-1,6-dimethyl-1,2,3,4-tetrahydronaphthalene                                                | C <sub>15</sub> H <sub>22</sub>                | STP   | 55.70      | 5.48        | 548 | 21    |
| 2,4a,5,8a-Tetramethyl-1,2,3,4,4a,7,8,8a-octahydronaphthalen-1-yl formate (isomer 1)                   | C <sub>15</sub> H <sub>24</sub> O <sub>2</sub> | FSTP  | 55.90      | 1.15        | 821 | 20    |
| Eucalyptol                                                                                            | C <sub>15</sub> H <sub>22</sub> O              | FSTP  | 56.00      | 4.58        | 785 | 17    |
| 2-((2R,4aR,8aR)-4a,8-Dimethyl-1,2,3,4,4a,5,6,8a-octahydronaphthalen-2-yl)acrylaldehyde                | C <sub>15</sub> H <sub>22</sub> O              | FSTP  | 56.00      | 4.66        | 737 | 16    |
| 1H-Cyclopropa[a]naphthalene, 1a,2,3,3a,4,5,6,7b-octahydro-1,1,3a,7-tetramethyl-, [1aR-(1aα,3aα,7bα)]- | C <sub>15</sub> H <sub>24</sub>                | STP   | 56.10      | 5.04        | 585 | 16    |
| Isocaryophyllene                                                                                      | C <sub>15</sub> H <sub>24</sub>                | STP   | 56.20      | 1.25        | 725 | 32    |
| 4,6,6-Trimethyl-2-(3-methylbuta-1,3-dienyl)-3-oxatricyclo[5.1.0.0(2,4)]octane                         | C <sub>15</sub> H <sub>22</sub> O              | FSTP  | 56.20      | 4.52        | 749 | 30    |
| 2-Pentanone, 4-cyclohexylidene-3,3-diethyl-                                                           | C <sub>15</sub> H <sub>26</sub> O              | FSTP  | 56.20      | 3.65        | 772 | 23    |
| 2(1H)Naphthalenone, 3,5,6,7,8,8a-hexahydro-4,8a-dimethyl-6-(1-methylethenyl)-                         | C <sub>15</sub> H <sub>22</sub> O              | FSTP  | 56.30      | 4.58        | 713 | 87    |
| 2-((2S,4aR)-4a,8-Dimethyl-1,2,3,4,4a,5,6,7-octahydronaphthalen-2-yl)propan-2-ol                       | C <sub>15</sub> H <sub>26</sub> O              | FSTP  | 56.50      | 5.22        | 798 | 65    |
| (R)-2-((4aS,8aR)-4a-Methyl-8-methylene-1,4,4a,5,6,7,8,8a-octahydronaphthalen-2-yl)propan-1-ol         | C <sub>15</sub> H <sub>24</sub> O              | FSTP  | 56.60      | 4.40        | 839 | 77    |
| T-2 Tetraol                                                                                           | C <sub>15</sub> H <sub>22</sub> O <sub>6</sub> | FSTP  | 56.70      | 4.96        | 583 | 14    |

Supplementary Table 3. (Cont.)

| Compound Name                                                                                     | Mol. formula                                   | Clas. | RT I (min) | RT II (sec) | MF  | P (%) |
|---------------------------------------------------------------------------------------------------|------------------------------------------------|-------|------------|-------------|-----|-------|
| Verrucarol                                                                                        | C <sub>15</sub> H <sub>22</sub> O <sub>4</sub> | FSTP  | 56.70      | 4.86        | 812 | 22    |
| Naphtho[1,2-b]furan-2-one, 2,3,3a,4,5,5a,6,7,9a,9b-decahydro-3,5a,9-trimethyl-7,9a-peroxy-        | C <sub>15</sub> H <sub>20</sub> O <sub>4</sub> | FSTP  | 56.70      | 3.67        | 672 | 12    |
| Gossonorol                                                                                        | C <sub>15</sub> H <sub>22</sub> O              | FSTP  | 56.90      | 5.83        | 751 | 19    |
| 6-Isopropenyl-4,8a-dimethyl-1,2,3,5,6,7,8,8a-octahydro-naphthalen-2-ol                            | C <sub>15</sub> H <sub>24</sub> O              | FSTP  | 56.90      | 4.46        | 697 | 68    |
| Sesquisabinene hydrate                                                                            | C <sub>15</sub> H <sub>26</sub> O              | FSTP  | 57.30      | 4.11        | 832 | 29    |
| Ledol                                                                                             | C <sub>15</sub> H <sub>26</sub> O              | FSTP  | 57.50      | 3.93        | 748 | 25    |
| α-Santalol                                                                                        | C <sub>15</sub> H <sub>24</sub> O              | FSTP  | 57.60      | 4.05        | 571 | 53    |
| α-Vetivol                                                                                         | C <sub>15</sub> H <sub>24</sub> O              | FSTP  | 57.60      | 4.44        | 804 | 18    |
| Cadinene                                                                                          | C <sub>15</sub> H <sub>22</sub> O              | FSTP  | 57.60      | 4.92        | 680 | 15    |
| Valerenol                                                                                         | C <sub>15</sub> H <sub>24</sub> O              | FSTP  | 57.60      | 4.46        | 846 | 33    |
| 1-Cyclopropene-1-pentanol, α,ε,ε,2-tetramethyl-3-(1-methylethenyl)-                               | C <sub>15</sub> H <sub>26</sub> O              | FSTP  | 57.70      | 5.79        | 741 | 18    |
| Khusimol                                                                                          | C <sub>15</sub> H <sub>24</sub> O              | FSTP  | 57.80      | 4.86        | 770 | 29    |
| 1(2H)-Naphthalenone, 3,4,4a,5,6,7-hexahydro-4a,5-dimethyl-3-(1-methylethenyl)-, [3S-(3α,4aa,5α)]- | C <sub>15</sub> H <sub>22</sub> O              | FSTP  | 57.90      | 5.30        | 748 | 42    |
| 7-Oxabicyclo[4.1.0]heptane, 1-(1,3-dimethyl-1,3-butadienyl)-2,2,6-trimethyl-, (E)-                | C <sub>15</sub> H <sub>24</sub> O              | FSTP  | 57.90      | 4.44        | 628 | 23    |
| 1-Naphthalenol, decahydro-1,4a-dimethyl-7-(1-methylethylidene)-, [1R-(1α,4aβ,8aα)]-               | C <sub>15</sub> H <sub>26</sub> O              | FSTP  | 58.00      | 4.52        | 797 | 16    |
| 7-Isopropenyl-1,4a-dimethyl-4,4a,5,6,7,8-hexahydro-3H-naphthalen-2-one                            | C <sub>15</sub> H <sub>22</sub> O              | FSTP  | 58.20      | 4.82        | 702 | 16    |
| β-Oplopenone                                                                                      | C <sub>15</sub> H <sub>24</sub> O              | FSTP  | 58.50      | 3.06        | 672 | 72    |
| Squamulosone                                                                                      | C <sub>15</sub> H <sub>22</sub> O              | FSTP  | 58.80      | 5.28        | 610 | 36    |
| Santalcamphor                                                                                     | C <sub>15</sub> H <sub>24</sub> O <sub>2</sub> | FSTP  | 59.00      | 5.02        | 779 | 20    |
| Calarene epoxide                                                                                  | C <sub>15</sub> H <sub>24</sub> O              | FSTP  | 59.00      | 4.96        | 666 | 55    |
| Epiglobulol                                                                                       | C <sub>15</sub> H <sub>26</sub> O              | FSTP  | 59.20      | 4.86        | 605 | 22    |
| 1-Formyl-2,2-dimethyl-3-trans-(3-methyl-but-2-enyl)-6-methylidene-cyclohexane                     | C <sub>15</sub> H <sub>24</sub> O              | FSTP  | 59.30      | 2.68        | 742 | 21    |
| Isolongifolol                                                                                     | C <sub>15</sub> H <sub>26</sub> O              | FSTP  | 59.40      | 4.21        | 745 | 20    |
| Silhiperfoladiene                                                                                 | C <sub>15</sub> H <sub>22</sub>                | STP   | 59.50      | 5.26        | 681 | 24    |
| Arctiol                                                                                           | C <sub>15</sub> H <sub>26</sub> O <sub>2</sub> | FSTP  | 59.70      | 3.95        | 739 | 21    |
| 6-(1-Hydroxymethylvinyl)-4,8a-dimethyl-3,5,6,7,8,8a-hexahydro-1H-naphthalen-2-one                 | C <sub>15</sub> H <sub>22</sub> O <sub>2</sub> | FSTP  | 59.70      | 5.32        | 746 | 15    |
| Parthenolide                                                                                      | C <sub>15</sub> H <sub>20</sub> O <sub>3</sub> | FSTP  | 59.80      | 5.22        | 769 | 19    |
| (E)-2-((8R,8aS)-8,8a-Dimethyl-3,4,6,7,8,8a-hexahydronaphthalen-2(1H)-ylidene)propan-1-ol          | C <sub>15</sub> H <sub>24</sub> O              | FSTP  | 60.00      | 4.94        | 687 | 30    |



Supplementary Table 3. (Cont.)

| Compound Name                                                                                     | Mol. formula                                   | Clas. | RT I (min) | RT II (sec) | MF  | P (%) |
|---------------------------------------------------------------------------------------------------|------------------------------------------------|-------|------------|-------------|-----|-------|
| 2-Methyl-3-(3-methyl-but-2-enyl)-2-(4-methyl-pent-3-enyl)-oxetane                                 | C <sub>15</sub> H <sub>26</sub> O              | FSTP  | 60.00      | 2.84        | 772 | 27    |
| 5,6-Azuledimethanol, 1,2,3,3a,8,8a-hexahydro-2,2,8-trimethyl-, (3aα,8β,8aα)-                      | C <sub>15</sub> H <sub>24</sub> O <sub>2</sub> | FSTP  | 60.10      | 4.92        | 727 | 93    |
| 4,4-Dimethyl-3-(3-methylbut-3-enylidene)-2-methylenebicyclo[4.1.0]heptane                         | C <sub>15</sub> H <sub>22</sub>                | STP   | 60.30      | 5.61        | 693 | 16    |
| α-Isonootkatol                                                                                    | C <sub>15</sub> H <sub>24</sub> O              | FSTP  | 60.40      | 5.52        | 754 | 16    |
| Spiro[tricyclo[4.4.0.0(5,9)]decane-10,2'-oxirane], 1-methyl-4-isopropyl-7,8-dihydroxy-, (8S)-     | C <sub>15</sub> H <sub>24</sub> O <sub>3</sub> | FSTP  | 60.40      | 5.34        | 732 | 94    |
| Bicyclo[5.2.0]nonane, 4-methylene-2,8,8-trimethyl-2-vinyl-                                        | C <sub>15</sub> H <sub>24</sub>                | STP   | 60.50      | 5.81        | 660 | 23    |
| 2,4a-Methanonaphthalen-7(4aH)-one, 1,2,3,4,5,6-hexahydro-1,1,5,5-tetramethyl-, (2s-cis)-          | C <sub>15</sub> H <sub>22</sub> O              | FSTP  | 60.60      | 4.88        | 733 | 41    |
| Linderane                                                                                         | C <sub>15</sub> H <sub>16</sub> O <sub>4</sub> | FSTP  | 60.70      | 5.63        | 790 | 27    |
| Ylangenal                                                                                         | C <sub>15</sub> H <sub>22</sub> O              | FSTP  | 60.90      | 5.12        | 775 | 20    |
| 3-Isopropyl-6,7-dimethyltricyclo[4.4.0.0(2,8)]decane-9,10-diol                                    | C <sub>15</sub> H <sub>26</sub> O <sub>2</sub> | FSTP  | 61.00      | 4.21        | 759 | 39    |
| 7-Oxabicyclo[4.1.0]heptane, 2,2,6-trimethyl-1-(3-methyl-1,3-butadienyl)-5-methylene-              | C <sub>15</sub> H <sub>22</sub> O              | FSTP  | 61.00      | 5.32        | 700 | 54    |
| 1H-3a,7-Methanoazulene-6-methanol, 2,3,4,7,8,8a-hexahydro-3,8,8-trimethyl-, [3R-(3α,3aβ,7β,8aα)]- | C <sub>15</sub> H <sub>24</sub> O              | FSTP  | 61.10      | 4.34        | 593 | 24    |
| Nootkatone                                                                                        | C <sub>15</sub> H <sub>22</sub> O              | FSTP  | 61.20      | 5.26        | 768 | 53    |
| 1H-3a,7-Methanoazulene, 2,3,6,7,8,8a-hexahydro-1,4,9,9-tetramethyl-, (1α,3aα,7α,8aβ)-             | C <sub>15</sub> H <sub>24</sub>                | STP   | 61.20      | 4.46        | 854 | 96    |
| 4,4-Dimethyl-3-(3-methylbut-2-enylidene)octane-2,7-dione                                          | C <sub>15</sub> H <sub>24</sub> O <sub>2</sub> | FSTP  | 61.40      | 3.73        | 793 | 17    |
| (5R,10R)-6,10-Dimethyl-2-(propan-2-ylidene)spiro[4.5]dec-6-en-8-one                               | C <sub>15</sub> H <sub>22</sub> O              | FSTP  | 61.50      | 5.16        | 783 | 21    |
| Cyperolactone                                                                                     | C <sub>15</sub> H <sub>22</sub> O <sub>2</sub> | FSTP  | 61.70      | 5.52        | 595 | 30    |
| Cumanin                                                                                           | C <sub>15</sub> H <sub>22</sub> O <sub>4</sub> | FSTP  | 62.10      | 5.50        | 689 | 68    |
| 1,4-Methanonaphthalene, 6,7-diethyldecahydro-, cis-                                               | C <sub>15</sub> H <sub>26</sub>                | STP   | 62.30      | 3.91        | 624 | 69    |
| 5-Hydroxymethyl-1,1,4a-trimethyl-6-methylenedecaahydronaphthalen-2-ol                             | C <sub>15</sub> H <sub>26</sub> O <sub>2</sub> | FSTP  | 62.40      | 4.09        | 787 | 20    |
| Uvidin C                                                                                          | C <sub>15</sub> H <sub>26</sub> O <sub>3</sub> | FSTP  | 62.50      | 4.66        | 848 | 85    |
| Cyperadione                                                                                       | C <sub>15</sub> H <sub>24</sub> O <sub>2</sub> | FSTP  | 62.70      | 5.75        | 773 | 19    |
| Ledene oxide-(I)                                                                                  | C <sub>15</sub> H <sub>24</sub> O              | FSTP  | 62.70      | 3.21        | 787 | 14    |
| Nootkaton epoxide                                                                                 | C <sub>15</sub> H <sub>22</sub> O <sub>2</sub> | FSTP  | 62.80      | 5.65        | 477 | 42    |
| (4aR,5S)-1-Hydroxy-4a,5-dimethyl-3-(propan-2-ylidene)-4,4a,5,6,7,8-hexahydronaphthalen-2(3H)-one  | C <sub>15</sub> H <sub>22</sub> O <sub>2</sub> | FSTP  | 63.20      | 5.22        | 722 | 13    |
| Corymbolone                                                                                       | C <sub>15</sub> H <sub>24</sub> O <sub>2</sub> | FSTP  | 63.70      | 5.59        | 774 | 17    |
| Neoisolongifolene                                                                                 | C <sub>15</sub> H <sub>22</sub> O              | FSTP  | 63.90      | 0.87        | 627 | 15    |
| Cedrol                                                                                            | C <sub>15</sub> H <sub>26</sub> O              | FSTP  | 64.10      | 5.56        | 789 | 12    |

Supplementary Table 3. (Cont.)

| Compound Name                                                                                                 | Mol. formula                                   | Clas. | RT I (min) | RT II (sec) | MF  | P (%) |
|---------------------------------------------------------------------------------------------------------------|------------------------------------------------|-------|------------|-------------|-----|-------|
| 2(3H)-Benzofuranone, 6-ethenylhexahydro-6-methyl-3-methylene-7-(1-methylethenyl)-, [3aS-(3aα,6α,7β,7aβ)]-     | C <sub>15</sub> H <sub>20</sub> O <sub>2</sub> | FSTP  | 64.20      | 5.75        | 822 | 27    |
| 5,7-Decadien-3-yne, 2,9-dihydroxy-5-(1-hydroxy-1-methylethyl)-2,9-dimethyl-, (Z,E)-                           | C <sub>15</sub> H <sub>24</sub> O <sub>3</sub> | FSTP  | 64.50      | 4.15        | 774 | 43    |
| 7-Tetracyclo[6.2.1.0(3.8)0(3.9)]undecanol, 4,4,11,11-tetramethyl-                                             | C <sub>15</sub> H <sub>24</sub> O              | FSTP  | 64.50      | 0.77        | 776 | 21    |
| 1-Acetyl-4,6,8-trimethylazulene                                                                               | C <sub>15</sub> H <sub>16</sub> O              | FSTP  | 64.50      | 0.46        | 584 | 50    |
| Clovanediol                                                                                                   | C <sub>15</sub> H <sub>26</sub> O <sub>2</sub> | FSTP  | 64.60      | 5.83        | 709 | 16    |
| Psilostachyin B                                                                                               | C <sub>15</sub> H <sub>18</sub> O <sub>4</sub> | FSTP  | 64.60      | 5.81        | 791 | 16    |
| 2-Cyclohexene-1-carboxaldehyde, 2,6-dimethyl-6-(4-methyl-3-pentenyl)-                                         | C <sub>15</sub> H <sub>24</sub> O              | FSTP  | 64.60      | 4.54        | 659 | 61    |
| α-Hydroxyculmorin                                                                                             | C <sub>15</sub> H <sub>26</sub> O <sub>3</sub> | FSTP  | 64.80      | 6.15        | 774 | 15    |
| Shyobunone                                                                                                    | C <sub>15</sub> H <sub>24</sub> O              | FSTP  | 64.80      | 2.96        | 810 | 21    |
| Solstitialin A                                                                                                | C <sub>15</sub> H <sub>20</sub> O <sub>5</sub> | FSTP  | 64.90      | 0.22        | 664 | 23    |
| 3-Methoxymethyl-2,5,5,8a-tetramethyl-6,7,8,8a-tetrahydro-5H-chromene                                          | C <sub>15</sub> H <sub>24</sub> O <sub>2</sub> | FSTP  | 65.10      | 5.85        | 734 | 18    |
| Callitrin                                                                                                     | C <sub>15</sub> H <sub>22</sub> O <sub>2</sub> | FSTP  | 65.40      | 5.42        | 799 | 36    |
| 1,4-Methanoazulen-3-ol, decahydro-1,5,5,8a-tetramethyl-, [1S-(1α,3β,3aβ,4α,8aβ)]-                             | C <sub>15</sub> H <sub>26</sub> O              | FSTP  | 65.50      | 6.35        | 736 | 11    |
| Valerenic acid                                                                                                | C <sub>15</sub> H <sub>22</sub> O <sub>2</sub> | FSTP  | 65.70      | 5.57        | 901 | 20    |
| 8-Deoxylactucin                                                                                               | C <sub>15</sub> H <sub>16</sub> O <sub>4</sub> | FSTP  | 66.30      | 1.01        | 687 | 34    |
| 1H-Indene, 2,3,3a,4,7,7a-hexahydro-2,2,4,4,7,7-hexamethyl-, trans-                                            | C <sub>15</sub> H <sub>26</sub>                | STP   | 66.30      | 2.98        | 757 | 14    |
| 5,9b-Dihydroxy-6,6,9a-trimethyl-5,5a,8,9-tetrahydro-3H-benzo[g][2]benzofuran-1,7-dione                        | C <sub>15</sub> H <sub>20</sub> O <sub>5</sub> | FSTP  | 66.40      | 6.01        | 560 | 52    |
| 2(3H)-Benzofuranone, 6-ethenylhexahydro-3,6-dimethyl-7-(1-methylethenyl)-, [3S-(3α,3aα,6α,7β,7aβ)]-           | C <sub>15</sub> H <sub>22</sub> O <sub>2</sub> | FSTP  | 66.40      | 5.67        | 820 | 50    |
| Asperilin                                                                                                     | C <sub>15</sub> H <sub>20</sub> O <sub>3</sub> | FSTP  | 66.60      | 6.13        | 766 | 25    |
| Cubedol                                                                                                       | C <sub>15</sub> H <sub>26</sub> O              | FSTP  | 66.60      | 0.34        | 801 | 19    |
| 2(1H)-Naphthalenone, 4a,5,6,7,8,8a-hexahydro-6-[1-(hydroxymethyl)ethenyl]-4,8a-dimethyl-, [4ar-(4aa,6α,8aβ)]- | C <sub>15</sub> H <sub>22</sub> O <sub>2</sub> | FSTP  | 66.70      | 0.32        | 632 | 15    |
| Cyclolongifolene oxide                                                                                        | C <sub>15</sub> H <sub>22</sub> O              | FSTP  | 66.90      | 1.43        | 793 | 32    |
| Dihydrolactucin                                                                                               | C <sub>15</sub> H <sub>18</sub> O <sub>5</sub> | FSTP  | 66.90      | 4.94        | 584 | 16    |
| Carissone                                                                                                     | C <sub>15</sub> H <sub>24</sub> O <sub>2</sub> | FSTP  | 67.10      | 5.79        | 814 | 52    |
| β-Cyclodihydrocostunolide                                                                                     | C <sub>15</sub> H <sub>22</sub> O <sub>2</sub> | FSTP  | 67.40      | 6.49        | 746 | 72    |
| Costunolide                                                                                                   | C <sub>15</sub> H <sub>20</sub> O <sub>2</sub> | FSTP  | 67.60      | 5.91        | 739 | 36    |
| 4-(3,3-Dimethyl-but-1-ynyl)-4-hydroxy-2,6,6-trimethylcyclohex-2-enone                                         | C <sub>15</sub> H <sub>22</sub> O <sub>2</sub> | FSTP  | 68.10      | 6.21        | 797 | 15    |
| 2,3,3-Trimethyl-2-(3-methylbuta-1,3-dienyl)-6-methylenecyclohexanone                                          | C <sub>15</sub> H <sub>22</sub> O              | FSTP  | 68.60      | 6.67        | 737 | 20    |

Supplementary Table 3. (Cont.)

| Compound Name                                                                            | Mol. formula                                   | Clas. | RT I (min) | RT II (sec) | MF  | P (%) |
|------------------------------------------------------------------------------------------|------------------------------------------------|-------|------------|-------------|-----|-------|
| Dihydrocolumellarin                                                                      | C <sub>15</sub> H <sub>22</sub> O <sub>2</sub> | FSTP  | 68.60      | 6.03        | 663 | 27    |
| Cedrandiol                                                                               | C <sub>15</sub> H <sub>26</sub> O <sub>2</sub> | FSTP  | 68.70      | 6.61        | 782 | 28    |
| Zizanoic acid                                                                            | C <sub>15</sub> H <sub>22</sub> O <sub>2</sub> | FSTP  | 69.40      | 3.17        | 656 | 32    |
| 4-(Hydroxymethyl)-3,4a,8,8-tetramethyl-1,2,5,6,7,8a-hexahydronaphthalene-1,2-diol        | C <sub>15</sub> H <sub>26</sub> O <sub>3</sub> | FSTP  | 69.90      | 0.50        | 704 | 15    |
| 2-((2R,4aR,8aS)-4a-Methyl-8-methylenedecahydronaphthalen-2-yl)acrylaldehyde              | C <sub>15</sub> H <sub>22</sub> O              | FSTP  | 70.00      | 0.32        | 697 | 10    |
| Furanoeremophilone                                                                       | C <sub>15</sub> H <sub>20</sub> O <sub>2</sub> | FSTP  | 70.40      | 0.67        | 775 | 23    |
| Columellarin                                                                             | C <sub>15</sub> H <sub>20</sub> O <sub>2</sub> | FSTP  | 71.00      | 6.33        | 706 | 24    |
| 1-Formyl-2,2,6-trimethyl-3-cis-(3-methylbut-2-enyl)-5-cyclohexene                        | C <sub>15</sub> H <sub>24</sub> O              | FSTP  | 71.50      | 3.69        | 823 | 61    |
| 5,6-Azulenedicarboxaldehyde, 1,2,3,3a,8,8a-hexahydro-2,2,8-trimethyl-, (3aα,8α,8aα)-(-)- | C <sub>15</sub> H <sub>20</sub> O <sub>2</sub> | FSTP  | 71.70      | 1.09        | 698 | 37    |
| 2-Acetoxy-1,1,10-trimethyl-6,9-epidioxydecalin                                           | C <sub>15</sub> H <sub>24</sub> O <sub>4</sub> | FSTP  | 71.90      | 6.25        | 553 | 39    |
| Lapachol                                                                                 | C <sub>15</sub> H <sub>14</sub> O <sub>3</sub> | FSTP  | 71.90      | 6.19        | 732 | 44    |
| 3α,4α,9β,11-Diepoxyumurolan-10-ol                                                        | C <sub>15</sub> H <sub>24</sub> O <sub>3</sub> | FSTP  | 72.20      | 6.07        | 779 | 39    |
| Naphtho[2,3-b]furan-2(4H)-one, 4a,5,6,7,8,8a,9,9a-octahydro-3,8a-dimethyl-5-methylene-   | C <sub>15</sub> H <sub>20</sub> O <sub>2</sub> | FSTP  | 72.20      | 0.56        | 686 | 99    |
| Reynosin                                                                                 | C <sub>15</sub> H <sub>20</sub> O <sub>3</sub> | FSTP  | 73.10      | 0.79        | 492 | 44    |
| Spirojatamol                                                                             | C <sub>15</sub> H <sub>26</sub> O              | FSTP  | 73.50      | 5.65        | 787 | 37    |
| Hydroxyvalerenic acid                                                                    | C <sub>15</sub> H <sub>22</sub> O <sub>3</sub> | FSTP  | 73.80      | 0.65        | 756 | 22    |
| Cyperanic acid                                                                           | C <sub>15</sub> H <sub>22</sub> O <sub>4</sub> | FSTP  | 73.90      | 5.89        | 639 | 68    |
| Nonanophenone                                                                            | C <sub>15</sub> H <sub>22</sub> O              | FSTP  | 74.00      | 0.89        | 749 | 40    |
| Gansongone                                                                               | C <sub>15</sub> H <sub>22</sub> O              | FSTP  | 74.10      | 1.33        | 728 | 29    |
| Humulaneol                                                                               | C <sub>15</sub> H <sub>26</sub> O              | FSTP  | 75.20      | 4.21        | 789 | 83    |
| 1H-3a,7-Methanoazulene, octahydro-3,8,8-trimethyl-6-methylene-, [3R-(3α,3aβ,7β,8aα)]-    | C <sub>15</sub> H <sub>24</sub>                | STP   | 75.40      | 1.63        | 714 | 25    |
| 2H-Cyclopentacyclooctene, 4,5,6,7,8,9-hexahydro-1,2,2,3-tetramethyl-                     | C <sub>15</sub> H <sub>24</sub>                | STP   | 76.60      | 4.33        | 745 | 43    |
| Alantolactone                                                                            | C <sub>15</sub> H <sub>20</sub> O <sub>3</sub> | FSTP  | 76.60      | 5.36        | 775 | 37    |
| Naphtho[2,3-b]furan-2(3H)-one, 4a,5,6,7,8,8a-hexahydro-3,8a-dimethyl-5-methylene-        | C <sub>15</sub> H <sub>18</sub> O <sub>2</sub> | FSTP  | 76.90      | 0.89        | 740 | 29    |
| Ageratriol                                                                               | C <sub>15</sub> H <sub>24</sub> O <sub>3</sub> | FSTP  | 76.90      | 4.86        | 634 | 47    |
| α-Santalol                                                                               | C <sub>15</sub> H <sub>24</sub> O              | FSTP  | 78.40      | 4.13        | 612 | 47    |
| Dihydroartemisinin                                                                       | C <sub>15</sub> H <sub>22</sub> O <sub>3</sub> | FSTP  | 78.90      | 1.77        | 794 | 52    |
| Lanceol                                                                                  | C <sub>15</sub> H <sub>24</sub> O              | FSTP  | 78.90      | 4.27        | 695 | 38    |

Supplementary Table 3. (Cont.)

| Compound Name                                                                                       | Mol. formula                                   | Clas. | RT I (min) | RT II (sec) | MF  | P (%) |
|-----------------------------------------------------------------------------------------------------|------------------------------------------------|-------|------------|-------------|-----|-------|
| 4,11-Dimethyl-8-(propan-2-yl)-5,12-dioxatricyclo[9.1.0.04,6]dodecan-7-ol                            | C <sub>15</sub> H <sub>26</sub> O <sub>3</sub> | FSTP  | 79.00      | 4.13        | 699 | 67    |
| β-Copaenol                                                                                          | C <sub>15</sub> H <sub>24</sub> O              | FSTP  | 79.10      | 4.07        | 595 | 27    |
| 2H-2,4a-Ethanonaphthalene, 1,3,4,5,6,7-hexahydro-2,5,5-trimethyl-                                   | C <sub>15</sub> H <sub>24</sub>                | STP   | 79.50      | 4.54        | 583 | 46    |
| Thujopsene                                                                                          | C <sub>15</sub> H <sub>24</sub>                | STP   | 80.30      | 3.95        | 588 | 34    |
| Hinesol                                                                                             | C <sub>15</sub> H <sub>26</sub> O              | FSTP  | 82.00      | 4.09        | 593 | 40    |
| Himachaladiene                                                                                      | C <sub>15</sub> H <sub>24</sub>                | STP   | 83.60      | 4.15        | 716 | 31    |
| α-Selinene                                                                                          | C <sub>15</sub> H <sub>24</sub>                | STP   | 84.00      | 4.15        | 670 | 15    |
| [5-(Hydroxymethyl)-2,5,8a-trimethyl-1,4,4a,6,7,8-hexahydronaphthalen-1-yl]methanol                  | C <sub>15</sub> H <sub>26</sub> O <sub>2</sub> | FSTP  | 84.20      | 0.52        | 794 | 29    |
| 3,4,8,8-Tetramethyl-4,5,6,7,8,8a-hexahydro-1H-3a,7-methanoazulen-4-ol                               | C <sub>15</sub> H <sub>24</sub> O              | FSTP  | 85.90      | 4.74        | 769 | 21    |
| 5β,7βH,10α-Eudesm-11-en-1α-ol                                                                       | C <sub>15</sub> H <sub>26</sub> O              | FSTP  | 86.60      | 4.21        | 747 | 16    |
| Limonenol                                                                                           | C <sub>15</sub> H <sub>24</sub> O <sub>2</sub> | FSTP  | 86.80      | 4.36        | 633 | 15    |
| β-Santalol                                                                                          | C <sub>15</sub> H <sub>24</sub> O              | FSTP  | 86.80      | 4.27        | 755 | 54    |
| 1,4-Methano-1H-indene, octahydro-4-methyl-8-methylene-7-(1-methylethyl)-, [1S-(1α,3αβ,4α,7α,7αβ)]-  | C <sub>15</sub> H <sub>24</sub>                | STP   | 86.80      | 1.71        | 671 | 42    |
| 9-(3,3-Dimethyloxiran-2-yl)-2,7-dimethylnona-2,6-dien-1-ol                                          | C <sub>15</sub> H <sub>26</sub> O <sub>2</sub> | FSTP  | 87.10      | 4.48        | 681 | 28    |
| Eudesmaol                                                                                           | C <sub>15</sub> H <sub>24</sub> O              | FSTP  | 87.40      | 3.97        | 712 | 44    |
| 6S-2,3,8,8-Tetramethyltricyclo[5.2.2.0(1,6)]undec-2-ene                                             | C <sub>15</sub> H <sub>24</sub>                | STP   | 89.50      | 5.20        | 644 | 29    |
| Hydroxy albrassitriol                                                                               | C <sub>15</sub> H <sub>26</sub> O <sub>4</sub> | FSTP  | 89.70      | 2.44        | 702 | 53    |
| 1,7-Dimethyl-4-(1-methylethyl)cyclodecane                                                           | C <sub>15</sub> H <sub>30</sub>                | STP   | 92.40      | 4.86        | 667 | 25    |
| Picrotoxinin                                                                                        | C <sub>15</sub> H <sub>16</sub> O <sub>6</sub> | FSTP  | 94.80      | 3.69        | 625 | 84    |
| Isopetasol                                                                                          | C <sub>15</sub> H <sub>22</sub> O <sub>2</sub> | FSTP  | 96.70      | 4.96        | 630 | 88    |
| 3H-Cyclodeca[b]furan-2-one, 4,9-dihydroxy-6-methyl-3,10-dimethylene-3a,4,7,8,9,10,11,11a-octahydro- | C <sub>15</sub> H <sub>20</sub> O <sub>4</sub> | FSTP  | 100.80     | 4.29        | 681 | 44    |
| 2H-Cyclopropa[g]benzofuran, 4,5,5a,6,6a,6b-hexahydro-4,4,6b-trimethyl-2-(1-methylethenyl)-          | C <sub>15</sub> H <sub>22</sub> O              | FSTP  | 103.50     | 5.14        | 776 | 69    |
| Coronopilin                                                                                         | C <sub>15</sub> H <sub>20</sub> O <sub>4</sub> | FSTP  | 107.30     | 5.50        | 632 | 89    |
| 3-Oxo-10(14)-epoxyguai-11(13)-en-6,12-olide                                                         | C <sub>15</sub> H <sub>18</sub> O <sub>4</sub> | FSTP  | 110.90     | 4.36        | 750 | 30    |
| Longipinocarveol                                                                                    | C <sub>15</sub> H <sub>24</sub> O              | FSTP  | 111.10     | 4.96        | 695 | 32    |
| 1H-Indene, 2,3,3a,4,7,7a-hexahydro-2,2,4,4,7,7-hexamethyl-                                          | C <sub>15</sub> H <sub>26</sub>                | STP   | 113.50     | 5.28        | 622 | 80    |
| 4-Hydroxy-5-(5-hydroxypentan-2-yl)-6-methyl-3-methylidene-3a,4,7,7a-tetrahydro-1-benzofuran-2-one   | C <sub>15</sub> H <sub>22</sub> O <sub>4</sub> | FSTP  | 114.50     | 4.56        | 690 | 67    |
| 2,4a,8,8-Tetramethyldecahydrocyclopropa[d]naphthalene                                               | C <sub>15</sub> H <sub>26</sub>                | STP   | 116.40     | 4.25        | 766 | 71    |

**Supplementary Table 3.** (Cont.)

| Compound Name                                              | Mol. formula                                   | Clas. | RT I (min) | RT II (sec) | MF  | P (%) |
|------------------------------------------------------------|------------------------------------------------|-------|------------|-------------|-----|-------|
| $\gamma$ -Himachalene                                      | C <sub>15</sub> H <sub>24</sub>                | STP   | 116.70     | 5.00        | 742 | 79    |
| Spiro[4.5]decan-7-one, 1,8-dimethyl-8,9-epoxy-4-isopropyl- | C <sub>15</sub> H <sub>24</sub> O <sub>2</sub> | FSTP  | 119.60     | 4.80        | 597 | 54    |
| 1,5,9,9-Tetramethyl-2-oxatricyclo[6.4.0.0(4,8)]dodecane    | C <sub>15</sub> H <sub>26</sub> O              | FSTP  | 122.90     | 4.05        | 690 | 44    |

**Supplementary Table 4.** Terpenoid standard mixture analysed using GCxGC-TOF/MS.

| Compound Name                                                                                 | Molecular formula | Classification  | RT I (min) | RT II (min) | MF  | P (%) |
|-----------------------------------------------------------------------------------------------|-------------------|-----------------|------------|-------------|-----|-------|
| Butanoic acid, 3-methyl-, 1-ethenyl-1,5-dimethyl-4-hexenyl ester                              | C15H26O2          | Sesquiterpenoid | 12.00      | 1.07        | 726 | 73    |
| Camphene                                                                                      | C10H16            | Monoterpenoid   | 12.50      | 1.29        | 879 | 88    |
| Bicyclo[3.1.1]heptane, 6,6-dimethyl-2-methylene-, (1S)-                                       | C10H16            | Monoterpenoid   | 13.60      | 1.43        | 780 | 78    |
| $\beta$ -Myrcene                                                                              | C10H16            | Monoterpenoid   | 13.90      | 1.37        | 780 | 78    |
| Bicyclo[3.1.0]hex-2-ene, 4-methylene-1-(1-methylethyl)-                                       | C10H14            | Monoterpenoid   | 14.20      | 1.57        | 603 | 60    |
| Bicyclo[3.1.0]hex-2-ene, 2-methyl-5-(1-methylethyl)-                                          | C10H16            | Monoterpenoid   | 14.70      | 1.63        | 883 | 88    |
| 5-Isopropyl-2-methylbicyclo[3.1.0]hexan-2-ol #                                                | C10H18O           | Monoterpenoid   | 15.20      | 1.61        | 543 | 54    |
| p-Cymene                                                                                      | C10H14            | Monoterpenoid   | 15.60      | 1.86        | 572 | 57    |
| Limonene                                                                                      | C10H16            | Monoterpenoid   | 15.80      | 1.63        | 951 | 95    |
| Eucalyptol                                                                                    | C10H18O           | Monoterpenoid   | 16.00      | 1.85        | 676 | 68    |
| 3-Carene                                                                                      | C10H16            | Monoterpenoid   | 16.50      | 1.65        | 937 | 94    |
| $\gamma$ -Terpinene                                                                           | C10H16            | Monoterpenoid   | 17.20      | 1.85        | 896 | 90    |
| Bicyclo[3.1.0]hexan-2-ol, 2-methyl-5-(1-methylethyl)-, (1 $\alpha$ ,2 $\alpha$ ,5 $\alpha$ )- | C10H18O           | Monoterpenoid   | 17.70      | 2.00        | 838 | 84    |
| Cyclohexene, 1-methyl-4-(1-methylethylidene)-                                                 | C10H16            | Monoterpenoid   | 18.80      | 1.98        | 918 | 92    |
| Fenchone                                                                                      | C10H16O           | Monoterpenoid   | 19.00      | 2.56        | 949 | 95    |
| 3-Octanol, 3,7-dimethyl-                                                                      | C10H22O           | Monoterpenoid   | 19.10      | 1.73        | 949 | 95    |
| Fenchol                                                                                       | C10H18O           | Monoterpenoid   | 20.40      | 2.44        | 883 | 88    |
| 1-Pentene, 5-(2,2-dimethylcyclopropyl)-2-methyl-4-methylene-                                  | C12H20            | Ketone          | 21.00      | 2.64        | 592 | 59    |
| 1,2-Dihydrolinalool                                                                           | C10H20O           | Monoterpenoid   | 21.10      | 2.12        | 840 | 84    |
| cis-Verbenol                                                                                  | C10H16O           | Monoterpenoid   | 21.90      | 2.72        | 789 | 79    |
| (+)-2-Bornanone                                                                               | C10H16O           | Monoterpenoid   | 22.20      | 3.23        | 867 | 87    |
| Cyclohexanol, 5-methyl-2-(1-methylethenyl)-                                                   | C10H18O           | Monoterpenoid   | 22.20      | 2.48        | 978 | 98    |
| Cyclohexanone, 5-methyl-2-(1-methylethyl)-, cis-                                              | C10H18O           | Monoterpenoid   | 22.60      | 2.68        | 938 | 94    |
| Isoborneol                                                                                    | C10H18O           | Monoterpenoid   | 22.90      | 2.90        | 935 | 93    |
| endo-Borneol                                                                                  | C10H18O           | Monoterpenoid   | 23.40      | 2.96        | 946 | 95    |
| Cyclohexanol, 5-methyl-2-(1-methylethyl)-, [1S-(1 $\alpha$ ,2 $\alpha$ ,5 $\beta$ )]-         | C10H20O           | Monoterpenoid   | 23.70      | 2.50        | 764 | 76    |
| Terpinen-4-ol                                                                                 | C10H18O           | Monoterpenoid   | 24.00      | 2.74        | 930 | 93    |

**Supplementary Table 4. (Cont.)**

| Compound Name                                                                             | Molecular formula | Classification  | RT I (min) | RT II (min) | MF  | P (%) |
|-------------------------------------------------------------------------------------------|-------------------|-----------------|------------|-------------|-----|-------|
| $\alpha$ -Terpineol                                                                       | C10H18O           | Monoterpenoid   | 24.80      | 2.92        | 935 | 93    |
| Estragole                                                                                 | C10H12O           | Monoterpenoid   | 25.20      | 3.43        | 796 | 80    |
| Bicyclo[3.1.1]hept-2-ene-2-methanol, 6,6-dimethyl-                                        | C10H16O           | Monoterpenoid   | 25.20      | 3.09        | 883 | 88    |
| Bicyclo[3.1.1]hept-3-en-2-one, 4,6,6-trimethyl-                                           | C10H14O           | Monoterpenoid   | 26.00      | 3.89        | 630 | 63    |
| 2,6-Octadiene, 1-(1-ethoxyethoxy)-3,7-dimethyl-                                           | C14H26O2          | Ketone          | 26.80      | 2.76        | 885 | 89    |
| Cyclohexanone, 5-methyl-2-(1-methylethenyl)-                                              | C10H16O           | Monoterpenoid   | 27.80      | 3.53        | 845 | 85    |
| Carvone                                                                                   | C10H14O           | Monoterpenoid   | 28.00      | 3.75        | 925 | 93    |
| Bicyclo[3.1.1]heptan-3-one, 2-hydroxy-2,6,6-trimethyl-                                    | C10H16O2          | Monoterpenoid   | 28.50      | 4.17        | 529 | 53    |
| 2-Cyclohexen-1-one, 3-methyl-6-(1-methylethyl)-                                           | C10H16O           | Monoterpenoid   | 28.70      | 3.75        | 938 | 94    |
| Bicyclo[2.2.1]heptan-2-ol, 1,7,7-trimethyl-, acetate, (1S-endo)-                          | C12H20O2          | Ketone          | 30.70      | 2.96        | 895 | 89    |
| Phenol, 2-methyl-5-(1-methylethyl)-                                                       | C10H14O           | Monoterpenoid   | 30.90      | 3.71        | 757 | 76    |
| Cyclohexanol, 5-methyl-2-(1-methylethyl)-, acetate, (1 $\alpha$ ,2 $\alpha$ ,5 $\beta$ )- | C12H22O2          | Ketone          | 30.90      | 2.54        | 841 | 84    |
| Phenol, 2-methyl-5-(1-methylethyl)-                                                       | C10H14O           | Monoterpenoid   | 31.50      | 3.83        | 908 | 91    |
| Bicyclo[2.2.1]heptane-2,3-dione, 1,7,7-trimethyl-, (1S)-                                  | C10H14O2          | Monoterpenoid   | 31.80      | 5.38        | 973 | 97    |
| Santolina alcohol                                                                         | C10H18O           | Monoterpenoid   | 31.80      | 3.97        | 929 | 93    |
| (1R,2R,3S,5R)-(-)-2,3-Pinenediol                                                          | C10H18O2          | Monoterpenoid   | 33.00      | 4.34        | 908 | 91    |
| Bicyclo[2.2.1]heptane, 2-chloro-2,3,3-trimethyl-                                          | C10H17Cl          | Monoterpenoid   | 33.40      | 2.40        | 886 | 89    |
| 6-Octen-1-ol, 3,7-dimethyl-, acetate                                                      | C12H22O2          | Ketone          | 34.30      | 2.58        | 797 | 80    |
| Geranyl isovalerate                                                                       | C15H26O2          | Sesquiterpenoid | 35.10      | 2.88        | 809 | 81    |
| 4-Hexen-1-ol, 5-methyl-2-(1-methylethenyl)-, acetate                                      | C12H20O2          | Ketone          | 36.20      | 3.00        | 995 | 100   |
| $\alpha$ -Damascone                                                                       | C13H20O           | Ketone          | 37.20      | 3.45        | 834 | 83    |
| 1,3-Cyclohexadiene, 5-(1,5-dimethyl-4-hexenyl)-2-methyl-, [S-(R*,S*)]-                    | C15H24            | Sesquiterpenoid | 38.70      | 2.64        | 644 | 64    |
| Caryophyllene                                                                             | C15H24            | Sesquiterpenoid | 39.10      | 2.68        | 923 | 92    |
| cis- $\beta$ -Farnesene                                                                   | C15H24            | Sesquiterpenoid | 40.80      | 2.40        | 901 | 90    |
| Humulene                                                                                  | C15H24            | Sesquiterpenoid | 41.20      | 2.84        | 903 | 90    |
| 3-Buten-2-one, 4-(2,6,6-trimethyl-1-cyclohexen-1-yl)-                                     | C13H20O           | Ketone          | 42.80      | 3.61        | 849 | 85    |
| 1,3,6,10-Dodecatetraene, 3,7,11-trimethyl-, (Z,E)-                                        | C15H24            | Sesquiterpenoid | 43.00      | 2.58        | 877 | 88    |

**Supplementary Table 4. (Cont.)**

| Compound Name                                                                               | Molecular formula | Classification  | RT I (min) | RT II (min) | MF  | P (%) |
|---------------------------------------------------------------------------------------------|-------------------|-----------------|------------|-------------|-----|-------|
| 1,3,6,10-Dodecatetraene, 3,7,11-trimethyl-, (Z,E)-                                          | C15H24            | Sesquiterpenoid | 43.80      | 2.58        | 846 | 85    |
| (E)- $\beta$ -Farnesene                                                                     | C15H24            | Sesquiterpenoid | 44.00      | 2.60        | 855 | 85    |
| Butylated Hydroxytoluene                                                                    | C15H24O           | Sesquiterpenoid | 44.30      | 3.35        | 953 | 95    |
| 1-Isopropyl-4,7-dimethyl-1,2,3,5,6,8a-hexahydronaphthalene                                  | C15H24            | Sesquiterpenoid | 45.10      | 2.96        | 980 | 98    |
| 1,5-Diphenyl-2H-1,2,4-triazoline-3-thione                                                   | C14H11N3S         | Ketone          | 46.00      | 2.74        | 885 | 89    |
| (E)- $\beta$ -Farnesene                                                                     | C15H24            | Sesquiterpenoid | 47.00      | 3.57        | 953 | 95    |
| 1,6,10-Dodecatrien-3-ol, 3,7,11-trimethyl-, (E)-                                            | C15H26O           | Sesquiterpenoid | 47.10      | 2.92        | 898 | 90    |
| Caryophyllene oxide                                                                         | C15H24O           | Sesquiterpenoid | 48.80      | 3.69        | 954 | 95    |
| Cedrol                                                                                      | C15H26O           | Sesquiterpenoid | 50.00      | 3.87        | 838 | 84    |
| Cyclopentaneacetic acid, 3-oxo-2-(2-pentenyl)-, methyl ester, [1 $\alpha$ ,2 $\alpha$ (Z)]- | C13H20O3          | Ketone          | 52.00      | 4.72        | 957 | 96    |
| $\alpha$ -Bisabolol                                                                         | C15H26O           | Sesquiterpenoid | 54.00      | 3.53        | 970 | 97    |
| 2-Butenoic acid, 2-methyl-, 3,7-dimethyl-2,6-octadienyl ester, (E,Z)-                       | C15H24O2          | Sesquiterpenoid | 54.60      | 3.49        | 788 | 79    |
| 1-Methylene-2b-hydroxymethyl-3,3-dimethyl-4b-(3-methylbut-2-enyl)-cyclohexane               | C15H26O           | Sesquiterpenoid | 55.90      | 3.39        | 912 | 91    |
| Cyclopropane, 1-methyl-2-(3-methylpentyl)-                                                  | C10H20            | Monoterpenoid   | 56.00      | 1.81        | 931 | 93    |
| Azulene, 1,4-dimethyl-7-(1-methylethyl)-                                                    | C15H18            | Sesquiterpenoid | 59.20      | 5.14        | 915 | 91    |
| Nootkatone                                                                                  | C15H22O           | Sesquiterpenoid | 60.80      | 5.14        | 811 | 81    |
| Neophytadiene                                                                               | C20H38            | Diterpenoid     | 61.60      | 2.08        | 948 | 95    |
| (E,E)-7,11,15-Trimethyl-3-methylene-hexadeca-1,6,10,14-tetraene                             | C20H32            | Diterpenoid     | 65.60      | 2.84        | 879 | 88    |
| 3,7,11,15-Tetramethyl-2-hexadecen-1-ol                                                      | C20H40O           | Diterpenoid     | 66.90      | 2.44        | 835 | 83    |
| 1-Methylene-2b-hydroxymethyl-3,3-dimethyl-4b-(3-methylbut-2-enyl)-cyclohexane               | C15H26O           | Sesquiterpenoid | 68.00      | 2.98        | 602 | 60    |
| Musk ketone                                                                                 | C14H18N2O5        | Ketone          | 69.30      | 5.93        | 954 | 95    |
| Phytol                                                                                      | C20H40O           | Diterpenoid     | 74.50      | 2.90        | 935 | 93    |
| $\alpha$ -Santonin                                                                          | C15H18O3          | Sesquiterpenoid | 79.60      | 3.11        | 631 | 63    |
| 2-Methyl-3-(3-methyl-but-2-enyl)-2-(4-methyl-pent-3-enyl)-oxetane                           | C15H26O           | Sesquiterpenoid | 101.10     | 3.61        | 499 | 50    |
| Supraene                                                                                    | C30H50            | Triterpenoid    | 101.40     | 3.55        | 881 | 88    |
| Squalene                                                                                    | C30H50            | Triterpenoid    | 101.70     | 3.65        | 690 | 69    |



**Supplementary Table 5.** *Chlamydomonas reinhardtii* metabolism optimisation to produce heterologous sesquiterpenes.

| Construct transformed    | Cell concentration (cells/L) |         |         | Patchoulol titer ( $\mu\text{g/L}$ ) |      |     |             |         | Patchoulol titer (fg/cell) |       |      |             |         |
|--------------------------|------------------------------|---------|---------|--------------------------------------|------|-----|-------------|---------|----------------------------|-------|------|-------------|---------|
|                          | n                            | Mean    | SD      | n                                    | Mean | SD  | Fold change | p-value | n                          | Mean  | SD   | Fold change | p-value |
| PcPS_YFP                 | 2.1E+10                      |         |         | 77                                   |      |     |             |         | 3.7                        |       |      |             |         |
|                          | 2.1E+10                      | 2.3E+10 | 4.5E+09 | 109                                  | 119  | 37  | -           | -       | 5.3                        | 5.4   | 2.1  | -           | -       |
|                          | 2.0E+10                      |         |         | 165                                  |      |     |             |         | 8.4                        |       |      |             |         |
|                          | 2.9E+10                      |         |         | 125                                  |      |     |             |         | 4.3                        |       |      |             |         |
| 2.2E+10                  | 969                          |         |         | 44.6                                 |      |     |             |         |                            |       |      |             |         |
| PcPS_YFP + CrBKT         | 2.2E+10                      | 2.2E+10 | 2.1E+08 | 993                                  | 906  | 126 | 8           | 0.0003  | 45.3                       | 41.2  | 5.9  | 8           | 0.0114  |
|                          | 2.2E+10                      |         |         | 719                                  |      |     |             |         | 32.6                       |       |      |             |         |
|                          | 2.2E+10                      |         |         | 941                                  |      |     |             |         | 42.4                       |       |      |             |         |
|                          | 2.2E+10                      |         |         | 1502                                 |      |     |             |         | 67.1                       |       |      |             |         |
| PcPS_YFP + SQSkd         | 2.3E+10                      | 2.3E+10 | 2.1E+08 | 1809                                 | 1622 | 174 | 14          | <0.0001 | 80.3                       | 71.7  | 7.8  | 12          | 0.0110  |
|                          | 2.3E+10                      |         |         | 1729                                 |      |     |             |         | 76.2                       |       |      |             |         |
|                          | 2.3E+10                      |         |         | 1449                                 |      |     |             |         | 63.4                       |       |      |             |         |
|                          | 2.3E+10                      |         |         | 2171                                 |      |     |             |         | 110.7                      |       |      |             |         |
| PcPS_YFP + CrBKT + SQSkd | 2.6E+10                      | 2.8E+10 | 3.7E+09 | 2385                                 | 2215 | 272 | 21          | <0.0001 | 156.4                      | 132.7 | 41.1 | 25          | <0.0001 |
|                          | 2.9E+10                      |         |         | 2074                                 |      |     |             |         | 87.1                       |       |      |             |         |
|                          | 3.1E+10                      |         |         | 2231                                 |      |     |             |         | 176.7                      |       |      |             |         |
|                          | 2.3E+10                      |         |         | 2171                                 |      |     |             |         | 110.7                      |       |      |             |         |

**Supplementary Table 6.** List of plasmids.

| Construct number | Construct name | Gene name                     | Product                       | Gene length (bp) | Protein size (kDa) | Intron copies (i1RBCS2) | Reporter (FP) | Selection (Antibiotic Resistance) |
|------------------|----------------|-------------------------------|-------------------------------|------------------|--------------------|-------------------------|---------------|-----------------------------------|
| 01               | P007           | <i>mVenus</i>                 | Yellow fluorescent protein    | 1004             | 27                 | 3                       | YFP           | Paromomycin                       |
| 02               | P117           | <i>SaSS</i>                   | Santalene                     | 2441             | 92                 | 5                       | YFP           | Paromomycin                       |
| 03               | P118           | <i>CISS</i>                   | Santalene                     | 2387             | 91                 | 5                       | YFP           | Paromomycin                       |
| 04               | P119           | <i>CcSS</i>                   | Santalene                     | 2393             | 91                 | 5                       | YFP           | Paromomycin                       |
| 05               | P124           | <i>CzZS</i>                   | Zizaene                       | 2399             | 91                 | 4                       | YFP           | Paromomycin                       |
| 06               | P125           | <i>CzZS</i>                   | Zizaene                       | 2390             | 91                 | 4                       | YFP           | Paromomycin                       |
| 07               | P107           | <i>PeAS</i>                   | Aristolochene                 | 1446             | 65                 | 3                       | YFP           | Paromomycin                       |
| 08               | P108           | <i>PcAS</i>                   | Aristolochene                 | 1470             | 66                 | 3                       | YFP           | Paromomycin                       |
| 09               | P109           | <i>PcAS</i>                   | Aristolochene                 | 1521             | 68                 | 3                       | YFP           | Paromomycin                       |
| 10               | P110           | <i>PrAS</i>                   | Aristolochene                 | 1470             | 66                 | 3                       | YFP           | Paromomycin                       |
| 11               | P120           | <i>CsVS</i>                   | Valencene                     | 2378             | 91                 | 5                       | YFP           | Paromomycin                       |
| 12               | P121           | <i>CnVS</i>                   | Valencene                     | 2501             | 96                 | 5                       | YFP           | Paromomycin                       |
| 13               | P111           | <i>AcDGS I</i>                | $\delta$ -guaiene             | 2375             | 91                 | 5                       | YFP           | Paromomycin                       |
| 14               | P112           | <i>AcDGS II</i>               | $\delta$ -guaiene             | 2375             | 91                 | 5                       | YFP           | Paromomycin                       |
| 15               | P113           | <i>AcDGS III</i>              | $\delta$ -guaiene             | 2375             | 91                 | 5                       | YFP           | Paromomycin                       |
| 16               | P114           | <i>AsDGS I</i>                | $\delta$ -guaiene             | 2375             | 95                 | 5                       | YFP           | Paromomycin                       |
| 17               | P115           | <i>AsDGS II</i>               | $\delta$ -guaiene             | 2375             | 91                 | 5                       | YFP           | Paromomycin                       |
| 18               | P116           | <i>AsDGS III</i>              | $\delta$ -guaiene             | 2375             | 91                 | 5                       | YFP           | Paromomycin                       |
| 19               | P126           | <i>LaCS</i>                   | $\tau$ -Cadinol               | 2426             | 92                 | 5                       | YFP           | Paromomycin                       |
| 20               | P122           | <i>CsVL</i>                   | Valerioanol                   | 2453             | 94                 | 5                       | YFP           | Paromomycin                       |
| 21               | P123           | <i>ChVL</i>                   | Valerioanol                   | 2396             | 91                 | 5                       | YFP           | Paromomycin                       |
| 22               | P139           | <i>ispA_PcPS(C415F_H454A)</i> | Patchoulol                    | 3707             | 122                | 8                       | YFP           | Paromomycin                       |
| 23               | P140           | <i>PcPS(C415F_H454A)</i>      | Patchoulol                    | 2378             | 72                 | 6                       | YFP           | Paromomycin                       |
| 24               | P127           | <i>CcBS</i>                   | Bisabolol                     | 2468             | 93                 | 5                       | YFP           | Paromomycin                       |
| 25               | B005           | <i>mTFP1</i>                  | Cyan-green florescent protein | 1140             | 27                 | 3                       | TFP           | Bleomycin                         |
| 26               | B036           | <i>CISS</i>                   | Santalene                     | 1650             | 91                 | 5                       | BFP           | Bleomycin                         |
| 27               | B039           | <i>CzZS</i>                   | Zizaene                       | 2399             | 91                 | 4                       | BFP           | Bleomycin                         |
| 28               | B033           | <i>PcAS</i>                   | Aristolochene                 | 1078             | 67                 | 3                       | BFP           | Bleomycin                         |
| 29               | B037           | <i>CnVS</i>                   | Valencene                     | 1764             | 96                 | 5                       | BFP           | Bleomycin                         |

**Supplementary Table 6. (Cont.)**

| Construct number | Construct name | Gene name                     | Product                      | Gene length (bp) | Protein size (kDa) | Intron copies (i1RBCS2) | Reporter (FP) | Selection (Antibiotic Resistance) |
|------------------|----------------|-------------------------------|------------------------------|------------------|--------------------|-------------------------|---------------|-----------------------------------|
| 30               | B034           | <i>AcDGS1</i>                 | $\delta$ -guaiene            | 1638             | 91                 | 5                       | BFP           | Bleomycin                         |
| 31               | B035           | <i>AsDGSIII</i>               | $\delta$ -guaiene            | 1638             | 91                 | 5                       | BFP           | Bleomycin                         |
| 32               | B040           | <i>LaCS</i>                   | $\tau$ -Cadinol              | 1662             | 92                 | 5                       | BFP           | Bleomycin                         |
| 33               | B038           | <i>ChVL</i>                   | Valerioanol                  | 1659             | 91                 | 5                       | BFP           | Bleomycin                         |
| 34               | B031           | <i>ispA_PcPS(C415F_H454A)</i> | Patchoulol                   | 3707             | 122                | 8                       | BFP           | Bleomycin                         |
| 35               | B032           | <i>PcPS(C415F_H454A)</i>      | Patchoulol                   | 2378             | 72                 | 6                       | BFP           | Bleomycin                         |
| 36               | B041           | <i>CcBS</i>                   | Bisabolol                    | 1704             | 93                 | 5                       | BFP           | Bleomycin                         |
| 37               | P011           | <i>PcPS</i>                   | Patchoulol                   | 2097             | 72                 | 5                       | YFP           | Paromomycin                       |
| 38               | MS021          | BKT                           | Ketocarotenoids              | 2419             | 93                 | 3                       | -             | Spectinomycin                     |
| 39               | S001           | SQSkd                         | Squalene synthase knock-down | 1382             | 30                 | 3                       | gLuc          | Spectinomycin                     |

**Supplementary Table 7.** Sesquiterpenoid quantifications (Single transformation).

| Sesquiterpenoid   | Construct transformed | Cell concentration<br>(cells/L) |         |         | Product titer<br>( $\mu\text{g/L}$ culture) |      |     | Product titer<br>(fg/cell) |      |      |
|-------------------|-----------------------|---------------------------------|---------|---------|---------------------------------------------|------|-----|----------------------------|------|------|
|                   |                       | n                               | Mean    | SD      | n                                           | Mean | SD  | n                          | Mean | SD   |
| Santalene         | 3                     | 2.3E+10                         | 2.3E+10 | 2.1E+09 | 78                                          | 64   | 10  | 3.4                        | 2.7  | 0.5  |
|                   |                       | 2.1E+10                         |         |         | 55                                          |      |     | 2.7                        |      |      |
|                   |                       | 2.6E+10                         |         |         | 58                                          |      |     | 2.3                        |      |      |
|                   |                       | 2.4E+10                         |         |         | 63                                          |      |     | 2.6                        |      |      |
| Zizaene           | 6                     | 2.5E+10                         | 2.5E+10 | 4.1E+09 | 503                                         | 416  | 77  | 19.8                       | 16.6 | 2.5  |
|                   |                       | 3.1E+10                         |         |         | 448                                         |      |     | 14.5                       |      |      |
|                   |                       | 2.2E+10                         |         |         | 324                                         |      |     | 14.7                       |      |      |
|                   |                       | 2.2E+10                         |         |         | 390                                         |      |     | 17.4                       |      |      |
| Aristolochene     | 9                     | 1.9E+10                         | 1.7E+10 | 2.4E+09 | 32                                          | 25   | 6   | 1.6                        | 1.4  | 0.2  |
|                   |                       | 1.7E+10                         |         |         | 29                                          |      |     | 1.7                        |      |      |
|                   |                       | 1.9E+10                         |         |         | 22                                          |      |     | 1.2                        |      |      |
|                   |                       | 1.4E+10                         |         |         | 18                                          |      |     | 1.3                        |      |      |
| Valencene         | 12                    | 2.3E+10                         | 2.3E+10 | 0.0E+00 | 57                                          | 52   | 5   | 2.4                        | 2.5  | 0.1  |
|                   |                       | 2.3E+10                         |         |         | 54                                          |      |     | 2.5                        |      |      |
|                   |                       | 2.3E+10                         |         |         | 52                                          |      |     | 2.6                        |      |      |
|                   |                       | 2.3E+10                         |         |         | 46                                          |      |     | 2.5                        |      |      |
| $\delta$ -Guaiene | 13                    | 2.1E+10                         | 2.1E+10 | 3.4E+08 | 26                                          | 25   | 4   | 1.3                        | 1.2  | 0.2  |
|                   |                       | 2.1E+10                         |         |         | 30                                          |      |     | 1.4                        |      |      |
|                   |                       | 2.1E+10                         |         |         | 21                                          |      |     | 1.0                        |      |      |
|                   |                       | 2.1E+10                         |         |         | 22                                          |      |     | 1.0                        |      |      |
| $\delta$ -Guaiene | 18                    | 2.1E+10                         | 2.5E+10 | 3.2E+09 | 1747                                        | 1447 | 312 | 83.6                       | 60.3 | 20.4 |
|                   |                       | 2.4E+10                         |         |         | 1668                                        |      |     | 70.9                       |      |      |
|                   |                       | 2.7E+10                         |         |         | 1279                                        |      |     | 46.8                       |      |      |
|                   |                       | 2.7E+10                         |         |         | 1094                                        |      |     | 39.9                       |      |      |
| $\tau$ -Cadinol   | 19                    | 2.1E+10                         | 2.4E+10 | 2.6E+09 | 30                                          | 43   | 14  | 1.4                        | 1.8  | 0.6  |
|                   |                       | 2.7E+10                         |         |         | 37                                          |      |     | 1.4                        |      |      |
|                   |                       | 2.2E+10                         |         |         | 43                                          |      |     | 2.0                        |      |      |
|                   |                       | 2.4E+10                         |         |         | 62                                          |      |     | 2.6                        |      |      |
| Valerianol        | 21                    | 2.2E+10                         | 2.0E+10 | 1.9E+09 | 40                                          | 41   | 13  | 1.8                        | 2.1  | 0.6  |
|                   |                       | 1.8E+10                         |         |         | 44                                          |      |     | 2.4                        |      |      |
|                   |                       | 2.0E+10                         |         |         | 56                                          |      |     | 2.7                        |      |      |
|                   |                       | 1.8E+10                         |         |         | 25                                          |      |     | 1.4                        |      |      |
| Patchoulol        | 22                    | 2.4E+10                         | 2.1E+10 | 2.6E+09 | 1813                                        | 1729 | 132 | 77.1                       | 82.1 | 4.4  |
|                   |                       | 2.3E+10                         |         |         | 1871                                        |      |     | 80.4                       |      |      |
|                   |                       | 1.9E+10                         |         |         | 1618                                        |      |     | 83.5                       |      |      |
|                   |                       | 1.8E+10                         |         |         | 1614                                        |      |     | 87.5                       |      |      |
| Bisabolol         | 24                    | 2.2E+10                         | 2.2E+10 | 9.6E+08 | 28                                          | 21   | 5   | 1.3                        | 1.0  | 0.3  |
|                   |                       | 2.1E+10                         |         |         | 23                                          |      |     | 1.1                        |      |      |
|                   |                       | 2.3E+10                         |         |         | 19                                          |      |     | 0.8                        |      |      |
|                   |                       | 2.3E+10                         |         |         | 15                                          |      |     | 0.6                        |      |      |

**Supplementary Table 8.** Sesquiterpenoid quantifications (Double transformation).

| Sesquiterpenoid   | Construct transformed | Cell concentration (cells/L) |         |         | Product titer ( $\mu\text{g/L}$ culture) |      |     | Product titer (fg/cell) |      |      |
|-------------------|-----------------------|------------------------------|---------|---------|------------------------------------------|------|-----|-------------------------|------|------|
|                   |                       | n                            | Mean    | SD      | n                                        | Mean | SD  | n                       | Mean | SD   |
| Santalene         | 3+26                  | 2.1E+10                      | 2.4E+10 | 2.7E+09 | 211                                      | 250  | 27  | 10.0                    | 11   | 1.1  |
|                   |                       | 2.7E+10                      |         |         | 257                                      |      |     | 9.4                     |      |      |
|                   |                       | 2.4E+10                      |         |         | 269                                      |      |     | 11.3                    |      |      |
|                   |                       | 2.2E+10                      |         |         | 265                                      |      |     | 11.9                    |      |      |
| Zizaene           | 6+27                  | 2.4E+10                      | 2.4E+10 | 6.0E+08 | 739                                      | 642  | 80  | 30.4                    | 26   | 3.0  |
|                   |                       | 2.4E+10                      |         |         | 625                                      |      |     | 25.9                    |      |      |
|                   |                       | 2.5E+10                      |         |         | 659                                      |      |     | 26.2                    |      |      |
|                   |                       | 2.4E+10                      |         |         | 547                                      |      |     | 23.1                    |      |      |
| Aristolochene     | 9+28                  | 2.2E+10                      | 1.4E+10 | 6.0E+09 | 36                                       | 38   | 7   | 1.6                     | 3    | 1.7  |
|                   |                       | 1.4E+10                      |         |         | 39                                       |      |     | 2.8                     |      |      |
|                   |                       | 8.4E+09                      |         |         | 47                                       |      |     | 5.5                     |      |      |
|                   |                       | 1.2E+10                      |         |         | 30                                       |      |     | 2.6                     |      |      |
| Valencene         | 12+29                 | 2.4E+10                      | 2.1E+10 | 2.5E+09 | 332                                      | 313  | 17  | 14.3                    | 13   | 0.7  |
|                   |                       | 2.2E+10                      |         |         | 309                                      |      |     | 13.3                    |      |      |
|                   |                       | 2.0E+10                      |         |         | 292                                      |      |     | 12.5                    |      |      |
|                   |                       | 1.8E+10                      |         |         | 319                                      |      |     | 13.7                    |      |      |
| $\delta$ -Guaiene | 13+30                 | 2.1E+10                      | 2.2E+10 | 9.3E+08 | 54                                       | 53   | 13  | 2.5                     | 2    | 0.6  |
|                   |                       | 2.2E+10                      |         |         | 67                                       |      |     | 3.0                     |      |      |
|                   |                       | 2.3E+10                      |         |         | 57                                       |      |     | 2.5                     |      |      |
|                   |                       | 2.3E+10                      |         |         | 36                                       |      |     | 1.6                     |      |      |
| $\delta$ -Guaiene | 18+31                 | 2.3E+10                      | 2.4E+10 | 1.8E+09 | 3236                                     | 2692 | 482 | 137.8                   | 113  | 25.3 |
|                   |                       | 2.7E+10                      |         |         | 2092                                     |      |     | 78.1                    |      |      |
|                   |                       | 2.3E+10                      |         |         | 2861                                     |      |     | 122.0                   |      |      |
|                   |                       | 2.3E+10                      |         |         | 2580                                     |      |     | 113.0                   |      |      |
| $\tau$ -Cadinol   | 19+32                 | 2.6E+10                      | 2.5E+10 | 8.7E+08 | 374                                      | 399  | 36  | 14.5                    | 16   | 1.2  |
|                   |                       | 2.5E+10                      |         |         | 434                                      |      |     | 17.1                    |      |      |
|                   |                       | 2.4E+10                      |         |         | 363                                      |      |     | 14.9                    |      |      |
|                   |                       | 2.6E+10                      |         |         | 425                                      |      |     | 16.1                    |      |      |
| Valerianol        | 21+33                 | 2.6E+10                      | 2.4E+10 | 4.0E+09 | 446                                      | 538  | 85  | 17.1                    | 23   | 7.2  |
|                   |                       | 2.9E+10                      |         |         | 494                                      |      |     | 17.3                    |      |      |
|                   |                       | 2.1E+10                      |         |         | 640                                      |      |     | 31.0                    |      |      |
|                   |                       | 2.1E+10                      |         |         | 573                                      |      |     | 27.8                    |      |      |
| Patchoulol        | 22+34                 | 2.6E+10                      | 2.4E+10 | 2.6E+09 | 3007                                     | 2767 | 201 | 116.9                   | 115  | 9.3  |
|                   |                       | 2.4E+10                      |         |         | 2578                                     |      |     | 107.7                   |      |      |
|                   |                       | 2.1E+10                      |         |         | 2625                                     |      |     | 127.2                   |      |      |
|                   |                       | 2.7E+10                      |         |         | 2858                                     |      |     | 107.6                   |      |      |
| Bisabolol         | 24+35                 | 2.2E+10                      | 2.4E+10 | 1.5E+09 | 330                                      | 275  | 48  | 15.0                    | 12   | 2.6  |
|                   |                       | 2.5E+10                      |         |         | 293                                      |      |     | 11.7                    |      |      |
|                   |                       | 2.3E+10                      |         |         | 256                                      |      |     | 11.1                    |      |      |
|                   |                       | 2.5E+10                      |         |         | 219                                      |      |     | 8.8                     |      |      |

**Supplementary Table 9.** Summary of sesquiterpenoids quantification.

| Sesquiterpenoid   | Titer ( $\mu\text{g}/\text{cell}$ ) |       |                       |       | Titer ( $\text{fg}/\text{cell}$ ) |      |                       |      | Fold change |
|-------------------|-------------------------------------|-------|-----------------------|-------|-----------------------------------|------|-----------------------|------|-------------|
|                   | Single transformation               |       | Double transformation |       | Single transformation             |      | Double transformation |      |             |
|                   | Mean                                | SD    | Mean                  | SD    | Mean                              | SD   | mean                  | SD   |             |
| Santalene         | 63.5                                | 10.4  | 250.5                 | 26.9  | 2.7                               | 0.5  | 10.6                  | 1.1  | 3.9         |
| Zizaene           | 416.3                               | 76.8  | 642.3                 | 79.5  | 16.6                              | 2.5  | 26.4                  | 3.0  | 1.6         |
| Aristolochene     | 25.1                                | 6.3   | 38.1                  | 6.8   | 1.4                               | 0.2  | 3.1                   | 1.7  | 2.2         |
| Valencene         | 52.4                                | 4.7   | 313.1                 | 16.9  | 2.5                               | 0.1  | 13.4                  | 0.7  | 5.4         |
| $\delta$ -Guaiene | 1447.0                              | 311.5 | 2692.4                | 482.2 | 60.3                              | 20.4 | 112.7                 | 25.3 | 1.9         |
| $\tau$ -Cadinol   | 43.2                                | 13.9  | 398.8                 | 35.8  | 1.8                               | 0.6  | 15.7                  | 1.2  | 8.7         |
| Valerianol        | 41.3                                | 12.5  | 538.2                 | 85.4  | 2.1                               | 0.6  | 23.3                  | 7.2  | 11.1        |
| Patchoulol        | 1729.1                              | 132.4 | 2766.9                | 201.4 | 82.1                              | 4.4  | 114.8                 | 9.3  | 1.4         |
| Bisabolol         | 21.2                                | 5.5   | 274.9                 | 47.8  | 1.0                               | 0.3  | 11.7                  | 2.6  | 11.7        |

**Supplementary Table 10.** Concentrated algal-produced sesquiterpenoids identified in ethanol using GCxGC-TOF/MS.

| Compound Name          | Molecular formula                 | Classification | RT I (min) | RT II (min) | MF  | P (%) |
|------------------------|-----------------------------------|----------------|------------|-------------|-----|-------|
| $\alpha$ -Santalene    | C <sub>15</sub> H <sub>24</sub>   | STP            | 31.20      | 2.72        | 888 | 89    |
| Aromadendrene          | C <sub>15</sub> H <sub>22</sub>   | STP            | 34.70      | 2.64        | 821 | 82    |
| $\alpha$ -Cubebene     | C <sub>15</sub> H <sub>24</sub>   | STP            | 36.30      | 2.42        | 752 | 75    |
| $\beta$ -Bourbonene    | C <sub>15</sub> H <sub>24</sub>   | STP            | 36.90      | 2.54        | 718 | 72    |
| $\beta$ -Elemene       | C <sub>15</sub> H <sub>24</sub>   | STP            | 37.20      | 2.50        | 728 | 73    |
| $\beta$ -copaene       | C <sub>15</sub> H <sub>24</sub>   | STP            | 37.30      | 2.42        | 775 | 78    |
| $\alpha$ -gurjunene    | C <sub>15</sub> H <sub>24</sub>   | STP            | 38.20      | 2.66        | 744 | 74    |
| Isocaryophyllene       | C <sub>15</sub> H <sub>24</sub>   | STP            | 39.10      | 2.76        | 737 | 74    |
| Caryophyllene          | C <sub>15</sub> H <sub>24</sub>   | STP            | 39.30      | 2.68        | 752 | 75    |
| Seychellene            | C <sub>15</sub> H <sub>24</sub>   | STP            | 40.60      | 3.15        | 758 | 76    |
| $\beta$ -Santalene     | C <sub>15</sub> H <sub>24</sub>   | STP            | 41.30      | 2.74        | 695 | 69    |
| Alloaromadendrene      | C <sub>15</sub> H <sub>24</sub>   | STP            | 41.30      | 2.98        | 739 | 74    |
| Zizaene                | C <sub>15</sub> H <sub>24</sub>   | STP            | 41.40      | 3.00        | 761 | 76    |
| Cadinene               | C <sub>15</sub> H <sub>28</sub>   | STP            | 42.10      | 2.38        | 904 | 90    |
| $\alpha$ -Curcumene    | C <sub>15</sub> H <sub>22</sub>   | STP            | 42.50      | 3.04        | 815 | 82    |
| $\alpha$ -Farnesene    | C <sub>15</sub> H <sub>24</sub>   | STP            | 42.90      | 3.11        | 910 | 91    |
| $\beta$ -Guaiene       | C <sub>15</sub> H <sub>24</sub>   | STP            | 43.10      | 3.04        | 765 | 76    |
| Aristolochene          | C <sub>15</sub> H <sub>24</sub>   | STP            | 43.10      | 3.00        | 774 | 77    |
| Eremophilene           | C <sub>15</sub> H <sub>24</sub>   | STP            | 43.10      | 2.98        | 797 | 80    |
| Rosiglitazone          | C <sub>15</sub> H <sub>24</sub>   | STP            | 44.60      | 3.09        | 693 | 69    |
| Humulene               | C <sub>15</sub> H <sub>24</sub>   | STP            | 47.90      | 3.91        | 823 | 82    |
| $\alpha$ -Santalol     | C <sub>15</sub> H <sub>24</sub> O | FSTP           | 49.50      | 4.72        | 774 | 77    |
| $\alpha$ -Guaiene      | C <sub>15</sub> H <sub>24</sub>   | STP            | 50.40      | 2.60        | 748 | 75    |
| $\gamma$ -himachalene  | C <sub>15</sub> H <sub>24</sub>   | STP            | 51.10      | 4.17        | 812 | 81    |
| $\beta$ -Caryophyllene | C <sub>15</sub> H <sub>24</sub>   | STP            | 52.10      | 4.09        | 791 | 79    |
| $\beta$ -Longipinene   | C <sub>15</sub> H <sub>24</sub>   | STP            | 53.20      | 4.33        | 591 | 59    |
| $\alpha$ -Santalol     | C <sub>15</sub> H <sub>24</sub> O | FSTP           | 53.70      | 3.85        | 828 | 83    |

**Supplementary Table 10. (Cont.)**

| Compound Name               | Molecular formula                              | Classification | RT I (min) | RT II (min) | MF  | P (%) |
|-----------------------------|------------------------------------------------|----------------|------------|-------------|-----|-------|
| $\alpha$ -copaene           | C <sub>15</sub> H <sub>24</sub> O              | FSTP           | 53.90      | 4.44        | 690 | 69    |
| $\alpha$ -Eudesmol          | C <sub>15</sub> H <sub>24</sub> O              | FSTP           | 54.60      | 4.21        | 702 | 70    |
| Valencene                   | C <sub>15</sub> H <sub>24</sub>                | STP            | 54.90      | 4.21        | 814 | 81    |
| Elemol                      | C <sub>15</sub> H <sub>24</sub> O              | FSTP           | 57.30      | 5.73        | 805 | 81    |
| $\delta$ -Guaiene           | C <sub>15</sub> H <sub>24</sub>                | STP            | 59.67      | 3.75        | 779 | 78    |
| Nootkatone                  | C <sub>15</sub> H <sub>22</sub> O              | FSTP           | 61.00      | 5.28        | 830 | 83    |
| $\alpha$ -Patchoulene       | C <sub>15</sub> H <sub>24</sub>                | STP            | 61.40      | 3.04        | 737 | 74    |
| $\tau$ -Cadinol             | C <sub>15</sub> H <sub>24</sub> O              | FSTP           | 62.10      | 3.71        | 843 | 84    |
| $\gamma$ -gurjunene         | C <sub>15</sub> H <sub>24</sub>                | STP            | 64.30      | 5.20        | 894 | 89    |
| Valerianol                  | C <sub>15</sub> H <sub>24</sub> O              | FSTP           | 64.70      | 4.36        | 658 | 66    |
| $\alpha$ -Selinene          | C <sub>15</sub> H <sub>24</sub> O              | FSTP           | 69.60      | 6.19        | 949 | 95    |
| Patchouli alcohol           | C <sub>15</sub> H <sub>24</sub> O              | FSTP           | 73.20      | 4.52        | 865 | 86    |
| $\alpha$ -bisabol           | C <sub>15</sub> H <sub>24</sub>                | STP            | 78.30      | 2.92        | 866 | 87    |
| $\alpha$ -Bisabolol oxide B | C <sub>15</sub> H <sub>26</sub> O <sub>2</sub> | FSTP           | 81.00      | 3.55        | 676 | 68    |
| $\delta$ -Elemene           | C <sub>15</sub> H <sub>24</sub>                | STP            | 82.80      | 4.01        | 865 | 86    |



**Supplementary Table 11.** Sesquiterpenoids identified after hydroboration-oxidation reaction using GCxGC-TOF/MS.

| Compound Name               | Molecular formula                              | Classification | RT I (min) | RT II (min) | MF   | P (%) |
|-----------------------------|------------------------------------------------|----------------|------------|-------------|------|-------|
| $\alpha$ -Bisabolol oxide B | C <sub>15</sub> H <sub>26</sub> O <sub>2</sub> | FSTP           | 31.20      | 2.72        | 888  | 89    |
| $\alpha$ -Santalene         | C <sub>15</sub> H <sub>24</sub>                | STP            | 31.20      | 2.72        | 834  | 83    |
| $\alpha$ -cedrene           | C <sub>15</sub> H <sub>24</sub>                | STP            | 34.00      | 2.04        | 1005 | 101   |
| Zizaene                     | C <sub>15</sub> H <sub>24</sub>                | STP            | 34.40      | 3.00        | 883  | 88    |
| Aromadendrene               | C <sub>15</sub> H <sub>22</sub>                | STP            | 34.70      | 2.64        | 888  | 89    |
| $\beta$ -Vatirenene         | C <sub>15</sub> H <sub>22</sub>                | STP            | 35.80      | 3.85        | 728  | 73    |
| $\alpha$ -Cubebene          | C <sub>15</sub> H <sub>24</sub>                | STP            | 36.30      | 2.42        | 775  | 78    |
| $\beta$ -Bourbonene         | C <sub>15</sub> H <sub>24</sub>                | STP            | 36.90      | 2.54        | 744  | 74    |
| $\beta$ -Elemene            | C <sub>15</sub> H <sub>24</sub>                | STP            | 37.20      | 2.50        | 737  | 74    |
| Germacrene A                | C <sub>15</sub> H <sub>24</sub>                | STP            | 37.30      | 2.44        | 752  | 75    |
| $\beta$ -copaene            | C <sub>15</sub> H <sub>24</sub>                | STP            | 37.30      | 2.42        | 758  | 76    |
| Isocaryophyllene            | C <sub>15</sub> H <sub>24</sub>                | STP            | 39.10      | 2.76        | 910  | 91    |
| Caryophyllene               | C <sub>15</sub> H <sub>24</sub>                | STP            | 39.30      | 2.68        | 797  | 80    |
| Patchouladiene              | C <sub>15</sub> H <sub>22</sub>                | STP            | 39.50      | 3.04        | 693  | 69    |
| Cycloisolongifolol          | C <sub>15</sub> H <sub>24</sub> O              | FSTP           | 40.40      | 2.90        | 812  | 81    |
| Seychellene                 | C <sub>15</sub> H <sub>24</sub>                | STP            | 40.60      | 3.15        | 591  | 59    |
| Humulene                    | C <sub>15</sub> H <sub>24</sub>                | STP            | 40.90      | 3.91        | 702  | 70    |
| $\beta$ -Selinene           | C <sub>15</sub> H <sub>24</sub>                | STP            | 40.90      | 2.58        | 805  | 81    |
| $\beta$ -Santalene          | C <sub>15</sub> H <sub>24</sub>                | STP            | 41.30      | 2.74        | 779  | 78    |
| Alloaromadendrene           | C <sub>15</sub> H <sub>24</sub>                | STP            | 41.30      | 2.98        | 843  | 84    |
| $\alpha$ -Patchoulene       | C <sub>15</sub> H <sub>24</sub>                | STP            | 41.40      | 3.04        | 658  | 66    |
| $\alpha$ -gurjunene         | C <sub>15</sub> H <sub>24</sub>                | STP            | 41.40      | 3.00        | 761  | 76    |
| Cadinene                    | C <sub>15</sub> H <sub>28</sub>                | STP            | 42.10      | 2.38        | 804  | 80    |
| $\alpha$ -Farnesene         | C <sub>15</sub> H <sub>24</sub>                | STP            | 42.90      | 3.11        | 811  | 81    |
| $\beta$ -Guaiene            | C <sub>15</sub> H <sub>24</sub>                | STP            | 43.10      | 3.04        | 813  | 81    |
| $\alpha$ -coastal           | C <sub>15</sub> H <sub>22</sub> O              | FSTP           | 43.10      | 3.00        | 895  | 89    |

**Supplementary Table 11. (Cont.)**

| Compound Name          | Molecular formula                 | Classification | RT I (min) | RT II (min) | MF  | P (%) |
|------------------------|-----------------------------------|----------------|------------|-------------|-----|-------|
| Aristolochene          | C <sub>15</sub> H <sub>24</sub>   | STP            | 43.10      | 3.00        | 815 | 82    |
| Eremophilene           | C <sub>15</sub> H <sub>24</sub>   | STP            | 43.10      | 2.98        | 768 | 77    |
| $\alpha$ -himachalene  | C <sub>15</sub> H <sub>20</sub>   | FSTP           | 43.30      | 3.59        | 783 | 78    |
| $\beta$ -Bisabolene    | C <sub>15</sub> H <sub>24</sub> O | FSTP           | 43.30      | 3.21        | 763 | 76    |
| Eudesmatriene          | C <sub>15</sub> H <sub>22</sub>   | STP            | 43.40      | 3.17        | 821 | 82    |
| $\alpha$ -agorofuran   | C <sub>15</sub> H <sub>24</sub> O | FSTP           | 46.90      | 3.99        | 838 | 84    |
| Longifolene            | C <sub>15</sub> H <sub>20</sub>   | FSTP           | 47.20      | 3.69        | 841 | 84    |
| Aromadendran           | C <sub>15</sub> H <sub>26</sub>   | STP            | 47.40      | 4.25        | 842 | 84    |
| Neoisolongifolene      | C <sub>15</sub> H <sub>22</sub>   | STP            | 49.30      | 2.72        | 848 | 85    |
| $\alpha$ -Santalol     | C <sub>15</sub> H <sub>24</sub> O | FSTP           | 49.50      | 4.72        | 849 | 85    |
| isolede                | C <sub>15</sub> H <sub>24</sub>   | STP            | 50.10      | 3.47        | 852 | 85    |
| Humulene epoxide I     | C <sub>15</sub> H <sub>24</sub> O | FSTP           | 50.50      | 3.87        | 856 | 86    |
| $\gamma$ -himachalene  | C <sub>15</sub> H <sub>24</sub>   | STP            | 51.10      | 4.17        | 859 | 86    |
| $\delta$ -Guaiene      | C <sub>15</sub> H <sub>24</sub>   | STP            | 52.00      | 3.75        | 864 | 86    |
| $\beta$ -Caryophyllene | C <sub>15</sub> H <sub>24</sub>   | STP            | 52.10      | 4.09        | 866 | 87    |
| $\tau$ -Cadinol        | C <sub>15</sub> H <sub>26</sub> O | FSTP           | 52.10      | 3.71        | 867 | 87    |
| $\alpha$ -Guaiene      | C <sub>15</sub> H <sub>24</sub>   | STP            | 52.30      | 3.85        | 872 | 87    |
| Aristolene             | C <sub>15</sub> H <sub>24</sub>   | STP            | 52.50      | 4.19        | 875 | 88    |
| Agarospirol            | C <sub>15</sub> H <sub>26</sub> O | FSTP           | 52.80      | 4.07        | 877 | 88    |
| Alloaromadendrenol     | C <sub>15</sub> H <sub>26</sub> O | FSTP           | 52.80      | 4.07        | 986 | 99    |
| Globulol               | C <sub>15</sub> H <sub>26</sub> O | FSTP           | 52.80      | 4.31        | 880 | 88    |
| Cubenol                | C <sub>15</sub> H <sub>26</sub> O | FSTP           | 52.90      | 4.13        | 881 | 88    |
| Ledol                  | C <sub>15</sub> H <sub>26</sub> O | FSTP           | 52.90      | 5.81        | 884 | 88    |
| Guaiol                 | C <sub>15</sub> H <sub>26</sub> O | FSTP           | 53.00      | 4.09        | 886 | 89    |
| $\beta$ -Longipinene   | C <sub>15</sub> H <sub>24</sub>   | STP            | 53.20      | 4.33        | 892 | 89    |
| Cedrol                 | C <sub>15</sub> H <sub>26</sub> O | FSTP           | 53.30      | 4.33        | 894 | 89    |
| $\alpha$ -Santalol     | C <sub>15</sub> H <sub>24</sub> O | FSTP           | 53.70      | 3.85        | 898 | 90    |

**Supplementary Table 11. (Cont.)**

| Compound Name                 | Molecular formula                              | Classification | RT I (min) | RT II (min) | MF  | P (%) |
|-------------------------------|------------------------------------------------|----------------|------------|-------------|-----|-------|
| $\alpha$ -Eudesmol            | C <sub>15</sub> H <sub>24</sub> O              | FSTP           | 54.60      | 4.21        | 904 | 90    |
| Valerenol                     | C <sub>15</sub> H <sub>24</sub> O              | FSTP           | 54.70      | 4.36        | 851 | 85    |
| Valerianol                    | C <sub>15</sub> H <sub>24</sub> O              | FSTP           | 54.70      | 4.36        | 868 | 87    |
| $\alpha$ -Curcumene           | C <sub>15</sub> H <sub>22</sub>                | STP            | 54.90      | 4.21        | 750 | 75    |
| Valencene                     | C <sub>15</sub> H <sub>24</sub>                | STP            | 54.90      | 4.21        | 911 | 91    |
| Agidol                        | C <sub>15</sub> H <sub>22</sub> O              | FSTP           | 57.00      | 5.00        | 990 | 99    |
| Elemol                        | C <sub>15</sub> H <sub>26</sub> O              | FSTP           | 57.30      | 5.73        | 928 | 93    |
| Eudesmenol                    | C <sub>15</sub> H <sub>26</sub> O              | FSTP           | 57.60      | 5.46        | 933 | 93    |
| Aromadendrenol                | C <sub>15</sub> H <sub>26</sub> O              | FSTP           | 58.00      | 3.59        | 977 | 98    |
| Valerenic acid                | C <sub>15</sub> H <sub>22</sub> O <sub>2</sub> | FSTP           | 58.60      | 5.73        | 937 | 94    |
| $\gamma$ -Gurjunenepoxide     | C <sub>15</sub> H <sub>24</sub> O              | FSTP           | 59.50      | 4.64        | 943 | 94    |
| $\alpha$ -Hexylcinnamaldehyde | C <sub>15</sub> H <sub>20</sub> O              | FSTP           | 59.67      | 3.75        | 930 | 93    |
| Ylangenal                     | C <sub>15</sub> H <sub>22</sub> O              | FSTP           | 60.40      | 5.77        | 949 | 95    |
| Nootkatone                    | C <sub>15</sub> H <sub>22</sub> O              | FSTP           | 61.00      | 5.28        | 951 | 95    |
| $\beta$ -acoradienol          | C <sub>15</sub> H <sub>24</sub> O              | FSTP           | 61.00      | 4.23        | 953 | 95    |
| Caryophylladienol             | C <sub>15</sub> H <sub>26</sub> O              | FSTP           | 61.10      | 6.01        | 957 | 96    |
| $\beta$ -Eudesmol             | C <sub>15</sub> H <sub>26</sub> O              | FSTP           | 61.60      | 5.12        | 959 | 96    |
| $\alpha$ -isocomene           | C <sub>15</sub> H <sub>24</sub>                | STP            | 62.10      | 3.71        | 909 | 91    |
| Alloaromadendrene oxide       | C <sub>15</sub> H <sub>24</sub> O              | FSTP           | 63.00      | 5.08        | 968 | 97    |
| Isoaromadendrene epoxide      | C <sub>15</sub> H <sub>24</sub> O              | FSTP           | 63.50      | 5.24        | 864 | 86    |
| $\gamma$ -gurjunene           | C <sub>15</sub> H <sub>24</sub>                | STP            | 64.30      | 5.20        | 982 | 98    |
| $\alpha$ -cyperone            | C <sub>15</sub> H <sub>20</sub> O              | FSTP           | 64.70      | 4.36        | 923 | 92    |
| Curcumenol                    | C <sub>15</sub> H <sub>28</sub> O              | FSTP           | 64.70      | 4.07        | 988 | 99    |
| Bourbonenol                   | C <sub>15</sub> H <sub>26</sub> O              | FSTP           | 65.00      | 3.21        | 989 | 99    |
| Cumanin                       | C <sub>15</sub> H <sub>22</sub> O <sub>4</sub> | FSTP           | 66.50      | 1.88        | 988 | 99    |
| $\alpha$ -Panasinsen          | C <sub>15</sub> H <sub>24</sub>                | STP            | 66.80      | 0.62        | 991 | 99    |
| Valerenolic acid              | C <sub>15</sub> H <sub>22</sub> O <sub>3</sub> | FSTP           | 67.00      | 5.57        | 935 | 94    |

**Supplementary Table 11. (Cont.)**

| Compound Name         | Molecular formula                              | Classification | RT I (min) | RT II (min) | MF  | P (%) |
|-----------------------|------------------------------------------------|----------------|------------|-------------|-----|-------|
| Aromadendrene oxide   | C <sub>15</sub> H <sub>24</sub> O              | FSTP           | 67.30      | 5.85        | 940 | 94    |
| γ-Elemene             | C <sub>15</sub> H <sub>24</sub>                | STP            | 69.10      | 5.83        | 954 | 95    |
| Humulenol-II          | C <sub>15</sub> H <sub>24</sub> O              | FSTP           | 69.40      | 6.17        | 975 | 97    |
| α-selinene            | C <sub>15</sub> H <sub>24</sub> O              | FSTP           | 69.60      | 6.19        | 951 | 95    |
| Farnesenol            | C <sub>15</sub> H <sub>26</sub> O              | FSTP           | 69.60      | 6.19        | 970 | 97    |
| Nootkaton epoxide     | C <sub>15</sub> H <sub>22</sub> O <sub>2</sub> | FSTP           | 71.70      | 1.09        | 922 | 92    |
| α-Eudesmol            | C <sub>15</sub> H <sub>22</sub> O <sub>2</sub> | FSTP           | 72.40      | 1.03        | 961 | 96    |
| α-copaene             | C <sub>15</sub> H <sub>24</sub> O              | FSTP           | 73.20      | 4.52        | 898 | 90    |
| Gurjunenol            | C <sub>15</sub> H <sub>28</sub> O              | FSTP           | 73.20      | 4.52        | 981 | 98    |
| Patchouli alcohol     | C <sub>15</sub> H <sub>24</sub> O              | FSTP           | 73.20      | 4.52        | 865 | 86    |
| Hydroxyumurolene      | C <sub>15</sub> H <sub>24</sub> O              | FSTP           | 73.60      | 6.33        | 958 | 96    |
| Cedrandiol            | C <sub>15</sub> H <sub>26</sub> O <sub>2</sub> | FSTP           | 73.90      | 1.41        | 958 | 96    |
| Copaenol              | C <sub>15</sub> H <sub>26</sub> O              | FSTP           | 78.00      | 4.07        | 980 | 98    |
| α-bisabol             | C <sub>15</sub> H <sub>24</sub>                | STP            | 78.30      | 2.92        | 866 | 87    |
| Santalenol            | C <sub>15</sub> H <sub>26</sub> O              | FSTP           | 78.30      | 2.92        | 985 | 99    |
| Cadinol               | C <sub>15</sub> H <sub>26</sub> O              | FSTP           | 81.00      | 3.17        | 987 | 99    |
| Santalol              | C <sub>15</sub> H <sub>26</sub> O              | FSTP           | 81.00      | 3.55        | 976 | 98    |
| Caryophyllene oxide   | C <sub>15</sub> H <sub>24</sub> O              | FSTP           | 82.40      | 3.65        | 950 | 95    |
| Seychellene alcohol   | C <sub>15</sub> H <sub>22</sub> O              | FSTP           | 82.80      | 4.01        | 984 | 98    |
| δ-Elemene             | C <sub>15</sub> H <sub>24</sub>                | STP            | 82.80      | 4.01        | 951 | 95    |
| Ylangenol             | C <sub>15</sub> H <sub>24</sub> O              | FSTP           | 83.10      | 2.98        | 966 | 97    |
| Zizaenol              | C <sub>15</sub> H <sub>26</sub> O              | FSTP           | 85.20      | 4.58        | 986 | 99    |
| Caryophyllene alcohol | C <sub>15</sub> H <sub>26</sub> O              | FSTP           | 86.00      | 4.19        | 982 | 98    |

**Supplementary Table 12.** Common sesquiterpenoids identified using GCxGC-TOF/MS in alga-derivate mixture, agarwood and agarwood distillate samples.

| Compound Name            | Molecular formula                              | Classification | Algal | Distillate | Agarwood |
|--------------------------|------------------------------------------------|----------------|-------|------------|----------|
| $\alpha$ -Santalol       | C <sub>15</sub> H <sub>24</sub> O              | FSTP           | 0.56% | 2.12%      | 2.69%    |
| Agarospirol              | C <sub>15</sub> H <sub>26</sub> O              | FSTP           | 3.44% | 5.53%      | 1.37%    |
| Alloaromadendrene        | C <sub>15</sub> H <sub>24</sub>                | STP            | 3.96% | 1.82%      | 4.19%    |
| Alloaromadendrene oxide  | C <sub>15</sub> H <sub>24</sub> O              | FSTP           | 4.19% | 4.65%      | 2.60%    |
| Aristolene               | C <sub>15</sub> H <sub>24</sub>                | STP            | 4.27% | 2.09%      | 1.47%    |
| Aristolochene            | C <sub>15</sub> H <sub>24</sub>                | STP            | 1.73% | 3.25%      | 3.02%    |
| Cadinene                 | C <sub>15</sub> H <sub>28</sub>                | STP            | 3.04% | 1.84%      | 2.28%    |
| Caryophyllene            | C <sub>15</sub> H <sub>24</sub>                | STP            | 3.52% | 2.51%      | 0.63%    |
| Cedrandiol               | C <sub>15</sub> H <sub>26</sub> O <sub>2</sub> | FSTP           | 4.18% | 0.72%      | 3.28%    |
| Cedrol                   | C <sub>15</sub> H <sub>26</sub> O              | FSTP           | 2.05% | 3.44%      | 3.68%    |
| Cubenol                  | C <sub>15</sub> H <sub>26</sub> O              | FSTP           | 2.54% | 4.20%      | 1.81%    |
| Cumanin                  | C <sub>15</sub> H <sub>22</sub> O <sub>4</sub> | FSTP           | 1.96% | 0.78%      | 2.62%    |
| Curcumenol               | C <sub>15</sub> H <sub>28</sub> O              | FSTP           | 1.62% | 2.38%      | 4.31%    |
| Globulol                 | C <sub>15</sub> H <sub>26</sub> O              | FSTP           | 0.13% | 0.28%      | 3.98%    |
| Guaiol                   | C <sub>15</sub> H <sub>26</sub> O              | FSTP           | 2.75% | 1.64%      | 2.64%    |
| Humulene                 | C <sub>15</sub> H <sub>24</sub>                | STP            | 2.36% | 5.59%      | 3.24%    |
| Humulene epoxide I       | C <sub>15</sub> H <sub>24</sub> O              | FSTP           | 0.67% | 0.60%      | 1.04%    |
| Humulenol-II             | C <sub>15</sub> H <sub>24</sub> O              | FSTP           | 2.85% | 4.75%      | 4.30%    |
| Isoaromadendrene epoxide | C <sub>15</sub> H <sub>24</sub> O              | FSTP           | 0.47% | 2.98%      | 2.04%    |
| isolekene                | C <sub>15</sub> H <sub>24</sub>                | STP            | 2.54% | 0.63%      | 1.34%    |
| Ledol                    | C <sub>15</sub> H <sub>26</sub> O              | FSTP           | 2.73% | 0.73%      | 3.98%    |
| Longifolene              | C <sub>15</sub> H <sub>20</sub>                | FSTP           | 2.45% | 2.50%      | 0.33%    |
| Neoisolongifolene        | C <sub>15</sub> H <sub>22</sub>                | STP            | 3.18% | 3.96%      | 3.14%    |
| Nootkatone epoxide       | C <sub>15</sub> H <sub>22</sub> O <sub>2</sub> | FSTP           | 1.90% | 3.81%      | 2.38%    |
| Nootkatone               | C <sub>15</sub> H <sub>22</sub> O              | FSTP           | 0.31% | 3.43%      | 2.57%    |
| Valencene                | C <sub>15</sub> H <sub>24</sub>                | STP            | 0.36% | 1.23%      | 0.86%    |

**Supplementary Table 12. (Cont.)**

| Compound Name   | Molecular formula                              | Classification | RT I (min) | RT II (min) | MF    |
|-----------------|------------------------------------------------|----------------|------------|-------------|-------|
| Valerenic acid  | C <sub>15</sub> H <sub>22</sub> O <sub>2</sub> | FSTP           | 2.88%      | 1.23%       | 0.46% |
| Valerenol       | C <sub>15</sub> H <sub>24</sub> O              | FSTP           | 1.86%      | 5.52%       | 3.82% |
| Ylangenal       | C <sub>15</sub> H <sub>22</sub> O              | FSTP           | 2.43%      | 3.79%       | 1.23% |
| α-Farnesene     | C <sub>15</sub> H <sub>24</sub>                | STP            | 4.10%      | 0.96%       | 2.66% |
| α-Guaiene       | C <sub>15</sub> H <sub>24</sub>                | STP            | 3.47%      | 3.71%       | 0.13% |
| α-Panasinsen    | C <sub>15</sub> H <sub>24</sub>                | STP            | 0.13%      | 1.48%       | 3.75% |
| α-Santalol      | C <sub>15</sub> H <sub>24</sub> O              | FSTP           | 1.20%      | 2.68%       | 3.17% |
| β-Caryophyllene | C <sub>15</sub> H <sub>24</sub>                | STP            | 3.70%      | 2.67%       | 0.07% |
| β-Eudesmol      | C <sub>15</sub> H <sub>26</sub> O              | FSTP           | 2.75%      | 1.72%       | 3.14% |
| β-Guaiene       | C <sub>15</sub> H <sub>24</sub>                | STP            | 3.46%      | 1.43%       | 3.07% |
| β-Longipinene   | C <sub>15</sub> H <sub>24</sub>                | STP            | 3.86%      | 0.95%       | 1.25% |
| β-Selinene      | C <sub>15</sub> H <sub>24</sub>                | STP            | 0.43%      | 0.67%       | 3.33% |
| γ-Elemene       | C <sub>15</sub> H <sub>24</sub>                | STP            | 3.55%      | 3.73%       | 4.34% |
| δ-Elemene       | C <sub>15</sub> H <sub>24</sub>                | STP            | 2.07%      | 0.83%       | 1.16% |
| δ-Guaiene       | C <sub>15</sub> H <sub>24</sub>                | STP            | 4.34%      | 1.16%       | 2.62% |

**Supplementary Table 13.** Mass spectra of sesquiterpenoids identified by GC – MS.

| Compound Name | Molecular formula               | Structure                                                                           | Mass spectra                                                                         |
|---------------|---------------------------------|-------------------------------------------------------------------------------------|--------------------------------------------------------------------------------------|
| Santalene     | C <sub>15</sub> H <sub>24</sub> | 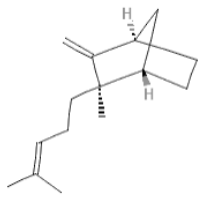   |    |
| Bergamotene   | C <sub>15</sub> H <sub>24</sub> |    |    |
| Zizaene       | C <sub>15</sub> H <sub>24</sub> |  |  |

Supplementary Table 13. (Cont.)

| Compound Name | Molecular formula               | Structure                                                                          | Mass spectra                                                                        |
|---------------|---------------------------------|------------------------------------------------------------------------------------|-------------------------------------------------------------------------------------|
| Cedrene       | C <sub>15</sub> H <sub>24</sub> | 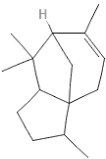  |   |
| Curcumene     | C <sub>15</sub> H <sub>22</sub> |   |   |
| Himalachene   | C <sub>15</sub> H <sub>24</sub> |  |  |



Supplementary Table 13. (Cont.)

| Compound Name | Molecular formula               | Structure                                                                          | Mass spectra                                                                        |
|---------------|---------------------------------|------------------------------------------------------------------------------------|-------------------------------------------------------------------------------------|
| Isolatedene   | C <sub>15</sub> H <sub>24</sub> | 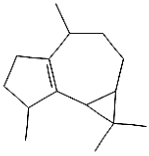  |   |
| Longipinene   | C <sub>15</sub> H <sub>24</sub> |   |   |
| Germacrene D  | C <sub>15</sub> H <sub>24</sub> |  |  |

Supplementary Table 13. (Cont.)

| Compound Name       | Molecular formula                 | Structure                                                                           | Mass spectra                                                                         |
|---------------------|-----------------------------------|-------------------------------------------------------------------------------------|--------------------------------------------------------------------------------------|
| $\gamma$ -Muurolene | C <sub>15</sub> H <sub>24</sub>   | 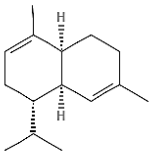   |    |
| Caryophyllene       | C <sub>15</sub> H <sub>24</sub>   |    |    |
| $\beta$ -Agarofuran | C <sub>15</sub> H <sub>26</sub> O |   |   |
| $\alpha$ -Humulene  | C <sub>15</sub> H <sub>24</sub>   |  |  |

Supplementary Table 13. (Cont.)

| Compound Name     | Molecular formula               | Structure                                                                          | Mass spectra                                                                        |
|-------------------|---------------------------------|------------------------------------------------------------------------------------|-------------------------------------------------------------------------------------|
| $\alpha$ -Guaiene | C <sub>15</sub> H <sub>24</sub> | 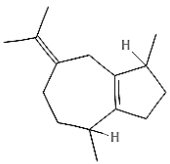  |   |
| Copaene           | C <sub>15</sub> H <sub>24</sub> |   |   |
| Aromadendrene     | C <sub>15</sub> H <sub>24</sub> |  |  |

Supplementary Table 13. (Cont.)

| Compound Name        | Molecular formula               | Structure                                                                          | Mass spectra                                                                        |
|----------------------|---------------------------------|------------------------------------------------------------------------------------|-------------------------------------------------------------------------------------|
| $\beta$ -Bourbonene  | C <sub>15</sub> H <sub>24</sub> | 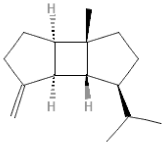  |   |
| $\alpha$ -Bourbonene | C <sub>15</sub> H <sub>24</sub> |   |   |
| Alloaromadendrene    | C <sub>15</sub> H <sub>24</sub> |  |  |

Supplementary Table 13. (Cont.)

| Compound Name | Molecular formula                 | Structure                                                                          | Mass spectra                                                                        |
|---------------|-----------------------------------|------------------------------------------------------------------------------------|-------------------------------------------------------------------------------------|
| Seychellene   | C <sub>15</sub> H <sub>24</sub>   | 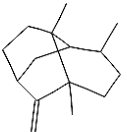  |   |
| Patchoulene   | C <sub>15</sub> H <sub>24</sub>   |   |   |
| Cadinol       | C <sub>15</sub> H <sub>26</sub> O |  |  |

Supplementary Table 13. (Cont.)

| Compound Name | Molecular formula               | Structure                                                                           | Mass spectra                                                                        |
|---------------|---------------------------------|-------------------------------------------------------------------------------------|-------------------------------------------------------------------------------------|
| Selinene      | C <sub>15</sub> H <sub>24</sub> | 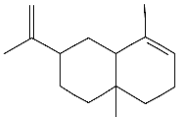   |   |
| Eremophilane  | C <sub>15</sub> H <sub>24</sub> |    |   |
| δ-Guaiene     | C <sub>15</sub> H <sub>24</sub> |  |  |

Supplementary Table 13. (Cont.)

| Compound Name       | Molecular formula                 | Structure                                                                           | Mass spectra                                                                         |
|---------------------|-----------------------------------|-------------------------------------------------------------------------------------|--------------------------------------------------------------------------------------|
| Aristolochene       | C <sub>15</sub> H <sub>24</sub>   | 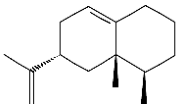   |    |
| Caryophyllene oxide | C <sub>15</sub> H <sub>24</sub> O |    |    |
| Valerianol          | C <sub>15</sub> H <sub>26</sub> O |   |   |
| Patchoulol          | C <sub>15</sub> H <sub>26</sub> O |  |  |

Supplementary Table 13. (Cont.)

| Compound Name | Molecular formula                 | Structure                                                                           | Mass spectra                                                                         |
|---------------|-----------------------------------|-------------------------------------------------------------------------------------|--------------------------------------------------------------------------------------|
| Patchoulene   | C <sub>15</sub> H <sub>24</sub>   | 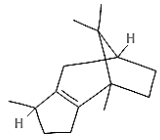   |    |
| Bisabolol     | C <sub>15</sub> H <sub>26</sub> O |    |    |
| Valencene     | C <sub>15</sub> H <sub>24</sub>   |    |   |
| Gurjunene     | C <sub>15</sub> H <sub>24</sub>   |  |  |



Supplementary Table 13. (Cont.)

| Compound Name      | Molecular formula | Structure                                                                          | Mass spectra                                                                        |
|--------------------|-------------------|------------------------------------------------------------------------------------|-------------------------------------------------------------------------------------|
| $\alpha$ -Santalol | $C_{15}H_{24}O$   | 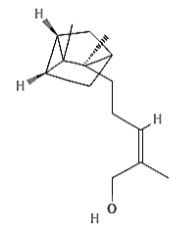  |   |
| $\beta$ -Santalol  | $C_{15}H_{24}O$   |   |   |
| Isolongifolol      | $C_{16}H_{28}O$   |  |  |

Supplementary Table 13. (Cont.)

| Compound Name   | Molecular formula                 | Structure                                                                           | Mass spectra                                                                         |
|-----------------|-----------------------------------|-------------------------------------------------------------------------------------|--------------------------------------------------------------------------------------|
| Cubenol         | C <sub>15</sub> H <sub>26</sub> O | 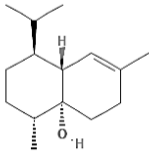   |    |
| Khusimol        | C <sub>15</sub> H <sub>24</sub> O |    |    |
| Dihydrokaranone | C <sub>15</sub> H <sub>22</sub> O |   |   |
| Cadinene        | C <sub>15</sub> H <sub>24</sub>   |  |  |

Supplementary Table 13. (Cont.)

| Compound Name                  | Molecular formula                              | Structure                                                                           | Mass spectra                                                                         |
|--------------------------------|------------------------------------------------|-------------------------------------------------------------------------------------|--------------------------------------------------------------------------------------|
| Guaiol                         | C <sub>15</sub> H <sub>26</sub> O              | 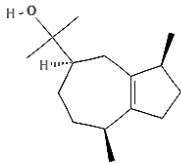   |    |
| Globulol                       | C <sub>15</sub> H <sub>26</sub> O              |    |    |
| Guaia-1(10),11-dien-15,2-olide | C <sub>15</sub> H <sub>20</sub> O <sub>2</sub> |   |   |
| Eudesmol                       | C <sub>15</sub> H <sub>26</sub> O              |  |  |

Supplementary Table 13. (Cont.)

| Compound Name          | Molecular formula                              | Structure                                                                           | Mass spectra                                                                        |
|------------------------|------------------------------------------------|-------------------------------------------------------------------------------------|-------------------------------------------------------------------------------------|
| Jinkoheremol           | C <sub>15</sub> H <sub>26</sub> O              | 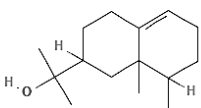   |   |
| Humulane-1,6-dien-3-ol | C <sub>15</sub> H <sub>26</sub> O              |    |   |
| Bisabolol oxide B      | C <sub>15</sub> H <sub>26</sub> O <sub>2</sub> |  |  |

Supplementary Table 13. (Cont.)

| Compound Name     | Molecular formula                              | Structure                                                                          | Mass spectra                                                                        |
|-------------------|------------------------------------------------|------------------------------------------------------------------------------------|-------------------------------------------------------------------------------------|
| Bisabolol oxide A | C <sub>15</sub> H <sub>26</sub> O <sub>2</sub> | 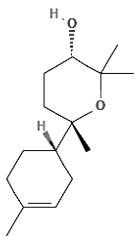  |   |
| Ylangene          | C <sub>15</sub> H <sub>24</sub>                |   |   |
| Agidol            | C <sub>15</sub> H <sub>24</sub> O              |  |  |

Supplementary Table 13. (Cont.)

| Compound Name       | Molecular formula | Structure                                                                         | Mass spectra                                                                       |
|---------------------|-------------------|-----------------------------------------------------------------------------------|------------------------------------------------------------------------------------|
| Ledol               | $C_{15}H_{26}O$   | 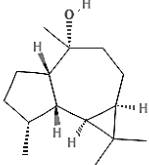 |  |
| Aromadendrene oxide | $C_{15}H_{24}O$   |  |  |
